# Supplementary material for: An Immune-Gene-Based Classifier Predicts Prognosis in Patients With Cervical Squamous Cell Carcinoma
Source: Front Mol Biosci. 2021 Jul 5;8:679474. doi: 10.3389/fmolb.2021.679474 (PMC8289438; doi:10.3389/fmolb.2021.679474)
Supplement: Supplementary file 12 [file Table6.XLS]

## Sheet: code (2)
#survival analysis
library(survival)
library("survminer")
rt=read.table("DFS_risk.txt",header=T,sep="\t")
diff=survdiff(Surv(futime, fustat) ~risk,data = rt)
pValue=1-pchisq(diff$chisq,df=1)
pValue=signif(pValue,4)
pValue=format(pValue, scientific = TRUE)
fit <- survfit(Surv(futime, fustat) ~ risk, data = rt)
pdf(file="survival.pdf",onefile = FALSE,
width = 5.5,
height =5)
ggsurvplot(fit,
data=rt,
conf.int=TRUE,
pval=paste0("p=",pValue),
pval.size=4,
risk.table=TRUE,
legend.labs=c("High risk", "Low risk"),
legend.title="Risk",
xlab="Time(years)",
break.time.by = 1,
risk.table.title="",
palette="Set1",
risk.table.height=.30)
dev.off()
summary(fit)
#ROC analysis
library(survivalROC)
rt=read.table("DFS_risk.txt",header=T,sep="\t",check.names=F,row.names=1)
pdf(file="ROC.pdf",width=6,height=6)
par(oma=c(0.5,1,0,1),font.lab=1.5,font.axis=1.5)
roc=survivalROC(Stime=rt$futime, status=rt$fustat, marker = rt$riskScore,
predict.time =12, method="KM")
plot(roc$FP, roc$TP, type="l", xlim=c(0,1), ylim=c(0,1),col='red',
xlab="False positive rate", ylab="True positive rate",
main=paste("ROC curve (", "AUC = ",sprintf("%.3f",roc$AUC),")"),
lwd = 2, cex.main=1.3, cex.lab=1.2, cex.axis=1.2, font=1.2)
abline(0,1)
dev.off()
#riskscore plot
library(pheatmap)
rt=read.table("DFS_risk.txt",sep="\t",header=T,row.names=1,check.names=F)
rt=rt[order(rt$riskScore),]
riskClass=rt[,"risk"]
lowLength=length(riskClass[riskClass=="low"])
highLength=length(riskClass[riskClass=="high"])
line=rt[,"riskScore"]
line[line>10]=10
pdf(file="riskScore.pdf",width = 10,height = 4)
plot(line,
type="p",
pch=20,
xlab="Patients (increasing risk socre)",
ylab="Risk score",
col=c(rep("green",lowLength),
rep("red",highLength)))
abline(h=median(rt$riskScore),v=lowLength,lty=2)
legend("topleft", c("High risk", "low Risk"),bty="n",pch=19,col=c("red","green"),cex=1.2)
dev.off()
color=as.vector(rt$fustat)
color[color==1]="red"
color[color==0]="green"
pdf(file="survStat.pdf",width = 10,height = 4)
plot(rt$futime,
pch=19,
xlab="Patients (increasing risk socre)",
ylab="Survival time (years)",
col=color)
legend("topleft", c("Dead", "Alive"),bty="n",pch=19,col=c("red","green"),cex=1.2)
abline(v=lowLength,lty=2)
dev.off()
rt1=rt[c(3:(ncol(rt)-2))]
rt1=log2(t(rt1)+0.001)
annotation=data.frame(type=rt[,ncol(rt)])
rownames(annotation)=rownames(rt)
pdf(file="heatmap.pdf",width = 10,height = 4)
pheatmap(rt1,
annotation=annotation,
cluster_cols = FALSE,
fontsize_row=11,
show_colnames = F,
fontsize_col=3,
color = colorRampPalette(c("green", "black", "red"))(50) )
dev.off()

## Sheet: Rhistory
p.val = 1 - pchisq(data.survdiff$chisq, length(data.survdiff$n) - 1)
HR = (data.survdiff$obs[2]/data.survdiff$exp[2])/(data.survdiff$obs[1]/data.survdiff$exp[1])
up95 = exp(log(HR) + qnorm(0.975)*sqrt(1/data.survdiff$exp[2]+1/data.survdiff$exp[1]))
low95 = exp(log(HR) - qnorm(0.975)*sqrt(1/data.survdiff$exp[2]+1/data.survdiff$exp[1]))
if (p.val>0.05) next
HR <- paste("Hazard Ratio = ", round(HR,2), sep = "")
CI <- paste("95% CI: ", paste(round(low95,2), round(up95,2), sep = " - "), sep = "")
svsort <- svdata[order(svdata[,i]),]
pl[[i]]<-ggsurvplot(fit, data = survival_dat ,
#ggtheme = theme_bw(),
conf.int = F,
#conf.int.style = "step",
censor = F,
palette = c("#D95F02","#1B9E77"),
legend.title = i,
font.legend = 11,
#font.title = 12,font.x = 10,font.y = 10,
legend.labs=c(paste0(">",round(svsort[fit$n[2],i],2),"(",fit$n[1],")"),
paste0("<",round(svsort[fit$n[2],i],2),"(",fit$n[2],")")),
pval = paste(pval = ifelse(p.val < 0.001, "p < 0.001",
paste("p = ",round(p.val,3), sep = "")),
HR, CI, sep = "\n"))
ggsave(paste0(i,".pdf"),width = 6,height = 6)
}
setwd("J:/Project/最近项目/宫颈鳞癌/宫颈鳞癌 2021.5.22/宫颈鳞癌/代码/Figure 4")
rt=read.table("ROC-compare.txt",header=T,sep="\t",check.names=F,row.names=1) #读取cox回归风险文件
rt$futime=rt$futime/365
rocCol=brewer.pal('Set1',n=5)
aucText=c()
pdf(file="1-year_multiROC.pdf",width=6,height=6)
par(oma=c(0.5,1,0,1),font.lab=1.5,font.axis=1.5)
roc=survivalROC(Stime=rt$futime, status=rt$fustat, marker = rt$Nomogram, predict.time =1, method="KM")
plot(roc$FP, roc$TP, type="l", xlim=c(0,1), ylim=c(0,1),col=rocCol[1],
xlab="False positive rate", ylab="True positive rate",
lwd = 2, cex.main=1.3, cex.lab=1.2, cex.axis=1.2, font=1.2)
aucText=c(aucText,paste0("Nomogram"," (AUC=",sprintf("%.3f",roc$AUC),")"))
abline(0,1)
j=1
for(i in colnames(rt[,3:(ncol(rt)-1)])){
roc=survivalROC(Stime=rt$futime, status=rt$fustat, marker = rt[,i], predict.time =1, method="KM")
j=j+1
aucText=c(aucText,paste0(i," (AUC=",sprintf("%.3f",roc$AUC),")"))
lines(roc$FP, roc$TP, type="l", xlim=c(0,1), ylim=c(0,1),col=rocCol[j],lwd = 2)
}
legend("bottomright", aucText,lwd=2,bty="n",col=rocCol)
dev.off()
library(RColorBrewer)
rt=read.table("ROC_compare.txt",header=T,sep="\t",check.names=F,row.names=1) #读取cox回归风险文件
rt$futime=rt$futime/365
rocCol=brewer.pal('Set1',n=5)
aucText=c()
pdf(file="1-year_multiROC.pdf",width=6,height=6)
par(oma=c(0.5,1,0,1),font.lab=1.5,font.axis=1.5)
roc=survivalROC(Stime=rt$futime, status=rt$fustat, marker = rt$Nomogram, predict.time =1, method="KM")
plot(roc$FP, roc$TP, type="l", xlim=c(0,1), ylim=c(0,1),col=rocCol[1],
xlab="False positive rate", ylab="True positive rate",
lwd = 2, cex.main=1.3, cex.lab=1.2, cex.axis=1.2, font=1.2)
aucText=c(aucText,paste0("Nomogram"," (AUC=",sprintf("%.3f",roc$AUC),")"))
abline(0,1)
j=1
for(i in colnames(rt[,3:(ncol(rt)-1)])){
roc=survivalROC(Stime=rt$futime, status=rt$fustat, marker = rt[,i], predict.time =1, method="KM")
j=j+1
aucText=c(aucText,paste0(i," (AUC=",sprintf("%.3f",roc$AUC),")"))
lines(roc$FP, roc$TP, type="l", xlim=c(0,1), ylim=c(0,1),col=rocCol[j],lwd = 2)
}
legend("bottomright", aucText,lwd=2,bty="n",col=rocCol)
dev.off()
rt=read.table("ROC_compare.txt",header=T,sep="\t",check.names=F,row.names=1)
rocCol=brewer.pal('Set1',n=5)
aucText=c()
pdf(file="1-year_multiROC.pdf",width=6,height=6)
par(oma=c(0.5,1,0,1),font.lab=1.5,font.axis=1.5)
roc=survivalROC(Stime=rt$futime, status=rt$fustat, marker = rt$Nomogram, predict.time =1, method="KM")
plot(roc$FP, roc$TP, type="l", xlim=c(0,1), ylim=c(0,1),col=rocCol[1],
xlab="False positive rate", ylab="True positive rate",
lwd = 2, cex.main=1.3, cex.lab=1.2, cex.axis=1.2, font=1.2)
aucText=c(aucText,paste0("Nomogram"," (AUC=",sprintf("%.3f",roc$AUC),")"))
abline(0,1)
j=1
for(i in colnames(rt[,3:(ncol(rt)-1)])){
roc=survivalROC(Stime=rt$futime, status=rt$fustat, marker = rt[,i], predict.time =1, method="KM")
j=j+1
aucText=c(aucText,paste0(i," (AUC=",sprintf("%.3f",roc$AUC),")"))
lines(roc$FP, roc$TP, type="l", xlim=c(0,1), ylim=c(0,1),col=rocCol[j],lwd = 2)
}
legend("bottomright", aucText,lwd=2,bty="n",col=rocCol)
dev.off()
source("stdca.R")
pbc<-read.table("Nomogram.txt",head=T,sep='\t',check.names = F,row.names = 1)
pbc$died <- pbc$fustat==1
pbc$fustat <- ifelse(pbc$died=="TRUE",1,0)
head(pbc)
Srv = Surv(pbc$futime, pbc$died)
coxmod1 = coxph(Srv ~ Stage , data=pbc)
pbc$Stage = c(1 - (summary(survfit(coxmod1, newdata=pbc), times=1)$surv))
coxmod2 = coxph(Srv ~ riskScore, data=pbc)
pbc$Riskscore = c(1 - (summary(survfit(coxmod2,newdata=pbc), times=1)$surv))
coxmod3 = coxph(Srv ~ Stage + riskScore, data=pbc)
pbc$Nomogram = c(1 - (summary(survfit(coxmod3,newdata=pbc), times=1)$surv))
head(pbc)
pdf("net_benefit_1_year.pdf",width = 6,height = 6)
stdca(data=pbc, outcome="fustat", ttoutcome="futime", timepoint=1,
predictors=c("Stage","Riskscore","Nomogram"),
cmprsk=TRUE, smooth=TRUE,
xstop=0.5,intervention="FALSE")
dev.off()
pbc <- read.table("Nomogram.txt",head=T,sep='\t',check.names = F,row.names = 1)
pbc$died <- pbc$fustat==1
pbc$fustat <- ifelse(pbc$died=="TRUE",1,0)
head(pbc)
Srv = Surv(pbc$futime, pbc$died)
coxmod1 = coxph(Srv ~ Stage , data=pbc)
pbc$Stage = c(1 - (summary(survfit(coxmod1, newdata=pbc), times=3)$surv))
coxmod2 = coxph(Srv ~ riskScore, data=pbc)
pbc$Riskscore = c(1 - (summary(survfit(coxmod2,newdata=pbc), times=3)$surv))
coxmod3 = coxph(Srv ~ Stage + riskScore, data=pbc)
pbc$Nomogram = c(1 - (summary(survfit(coxmod3,newdata=pbc), times=3)$surv))
head(pbc)
pdf("net_benefit_3_year.pdf",width = 6,height = 6)
stdca(data=pbc, outcome="fustat", ttoutcome="futime", timepoint=3,
predictors=c("Stage","Riskscore","Nomogram"),
cmprsk=TRUE, smooth=TRUE,
xstop=0.5,intervention="FALSE")
dev.off()
pbc <- read.table("Nomogram.txt",head=T,sep='\t',check.names = F,row.names = 1)
pbc$died <- pbc$fustat==1
pbc$fustat <- ifelse(pbc$died=="TRUE",1,0)
head(pbc)
Srv = Surv(pbc$futime, pbc$died)
coxmod1 = coxph(Srv ~ Stage , data=pbc)
pbc$Stage = c(1 - (summary(survfit(coxmod1, newdata=pbc), times=5)$surv))
coxmod2 = coxph(Srv ~ riskScore, data=pbc)
pbc$Riskscore = c(1 - (summary(survfit(coxmod2,newdata=pbc), times=5)$surv))
coxmod3 = coxph(Srv ~ Stage + riskScore, data=pbc)
pbc$Nomogram = c(1 - (summary(survfit(coxmod3,newdata=pbc), times=5)$surv))
head(pbc)
pdf("net_benefit_5_year.pdf",width = 6,height = 6)
stdca(data=pbc, outcome="fustat", ttoutcome="futime", timepoint=5,
predictors=c("Stage","Riskscore","Nomogram"),
cmprsk=TRUE, smooth=TRUE,
xstop=0.5,intervention="FALSE")
dev.off()
pbc<-read.table("Nomogram.txt",head=T,sep='\t',check.names = F,row.names = 1)
pbc$died <- pbc$fustat==1
pbc$fustat <- ifelse(pbc$died=="TRUE",1,0)
pbc$futime=pbc$futime/365
head(pbc)
Srv = Surv(pbc$futime, pbc$died)
coxmod1 = coxph(Srv ~ Stage , data=pbc)
pbc$Stage = c(1 - (summary(survfit(coxmod1, newdata=pbc), times=1)$surv))
coxmod2 = coxph(Srv ~ riskScore, data=pbc)
pbc$Riskscore = c(1 - (summary(survfit(coxmod2,newdata=pbc), times=1)$surv))
coxmod3 = coxph(Srv ~ Stage + riskScore, data=pbc)
pbc$Nomogram = c(1 - (summary(survfit(coxmod3,newdata=pbc), times=1)$surv))
head(pbc)
pdf("net_benefit_1_year.pdf",width = 6,height = 6)
stdca(data=pbc, outcome="fustat", ttoutcome="futime", timepoint=1,
predictors=c("Stage","Riskscore","Nomogram"),
cmprsk=TRUE, smooth=TRUE,
xstop=0.5,intervention="FALSE")
dev.off()
pbc <- read.table("Nomogram.txt",head=T,sep='\t',check.names = F,row.names = 1)
pbc$died <- pbc$fustat==1
pbc$fustat <- ifelse(pbc$died=="TRUE",1,0)
head(pbc)
Srv = Surv(pbc$futime, pbc$died)
coxmod1 = coxph(Srv ~ Stage , data=pbc)
pbc$Stage = c(1 - (summary(survfit(coxmod1, newdata=pbc), times=3)$surv))
coxmod2 = coxph(Srv ~ riskScore, data=pbc)
pbc$Riskscore = c(1 - (summary(survfit(coxmod2,newdata=pbc), times=3)$surv))
coxmod3 = coxph(Srv ~ Stage + riskScore, data=pbc)
pbc$Nomogram = c(1 - (summary(survfit(coxmod3,newdata=pbc), times=3)$surv))
head(pbc)
pdf("net_benefit_3_year.pdf",width = 6,height = 6)
stdca(data=pbc, outcome="fustat", ttoutcome="futime", timepoint=3,
predictors=c("Stage","Riskscore","Nomogram"),
cmprsk=TRUE, smooth=TRUE,
xstop=0.5,intervention="FALSE")
dev.off()
pbc <- read.table("Nomogram.txt",head=T,sep='\t',check.names = F,row.names = 1)
pbc$died <- pbc$fustat==1
pbc$fustat <- ifelse(pbc$died=="TRUE",1,0)
head(pbc)
Srv = Surv(pbc$futime, pbc$died)
coxmod1 = coxph(Srv ~ Stage , data=pbc)
pbc$Stage = c(1 - (summary(survfit(coxmod1, newdata=pbc), times=5)$surv))
coxmod2 = coxph(Srv ~ riskScore, data=pbc)
pbc$Riskscore = c(1 - (summary(survfit(coxmod2,newdata=pbc), times=5)$surv))
coxmod3 = coxph(Srv ~ Stage + riskScore, data=pbc)
pbc$Nomogram = c(1 - (summary(survfit(coxmod3,newdata=pbc), times=5)$surv))
head(pbc)
pdf("net_benefit_5_year.pdf",width = 6,height = 6)
stdca(data=pbc, outcome="fustat", ttoutcome="futime", timepoint=5,
predictors=c("Stage","Riskscore","Nomogram"),
cmprsk=TRUE, smooth=TRUE,
xstop=0.5,intervention="FALSE")
dev.off()
source("stdca.R")
pbc<-read.table("Nomogram.txt",head=T,sep='\t',check.names = F,row.names = 1)
pbc$died <- pbc$fustat==1
pbc$fustat <- ifelse(pbc$died=="TRUE",1,0)
pbc$futime=pbc$futime/365
head(pbc)
Srv = Surv(pbc$futime, pbc$died)
coxmod1 = coxph(Srv ~ Stage , data=pbc)
pbc$Stage = c(1 - (summary(survfit(coxmod1, newdata=pbc), times=1)$surv))
coxmod2 = coxph(Srv ~ riskScore, data=pbc)
pbc$Riskscore = c(1 - (summary(survfit(coxmod2,newdata=pbc), times=1)$surv))
coxmod3 = coxph(Srv ~ Stage + riskScore, data=pbc)
pbc$Nomogram = c(1 - (summary(survfit(coxmod3,newdata=pbc), times=1)$surv))
head(pbc)
pdf("net_benefit_1_year.pdf",width = 6,height = 6)
stdca(data=pbc, outcome="fustat", ttoutcome="futime", timepoint=1,
predictors=c("Stage","Riskscore","Nomogram"),
cmprsk=TRUE, smooth=TRUE,
xstop=0.5,intervention="FALSE")
dev.off()
pbc <- read.table("Nomogram.txt",head=T,sep='\t',check.names = F,row.names = 1)
pbc$died <- pbc$fustat==1
pbc$fustat <- ifelse(pbc$died=="TRUE",1,0)
pbc$futime=pbc$futime/365
head(pbc)
Srv = Surv(pbc$futime, pbc$died)
coxmod1 = coxph(Srv ~ Stage , data=pbc)
pbc$Stage = c(1 - (summary(survfit(coxmod1, newdata=pbc), times=3)$surv))
coxmod2 = coxph(Srv ~ riskScore, data=pbc)
pbc$Riskscore = c(1 - (summary(survfit(coxmod2,newdata=pbc), times=3)$surv))
coxmod3 = coxph(Srv ~ Stage + riskScore, data=pbc)
pbc$Nomogram = c(1 - (summary(survfit(coxmod3,newdata=pbc), times=3)$surv))
head(pbc)
pdf("net_benefit_3_year.pdf",width = 6,height = 6)
stdca(data=pbc, outcome="fustat", ttoutcome="futime", timepoint=3,
predictors=c("Stage","Riskscore","Nomogram"),
cmprsk=TRUE, smooth=TRUE,
xstop=0.5,intervention="FALSE")
dev.off()
pbc <- read.table("Nomogram.txt",head=T,sep='\t',check.names = F,row.names = 1)
pbc$died <- pbc$fustat==1
pbc$fustat <- ifelse(pbc$died=="TRUE",1,0)
pbc$futime=pbc$futime/365
head(pbc)
Srv = Surv(pbc$futime, pbc$died)
coxmod1 = coxph(Srv ~ Stage , data=pbc)
pbc$Stage = c(1 - (summary(survfit(coxmod1, newdata=pbc), times=5)$surv))
coxmod2 = coxph(Srv ~ riskScore, data=pbc)
pbc$Riskscore = c(1 - (summary(survfit(coxmod2,newdata=pbc), times=5)$surv))
coxmod3 = coxph(Srv ~ Stage + riskScore, data=pbc)
pbc$Nomogram = c(1 - (summary(survfit(coxmod3,newdata=pbc), times=5)$surv))
head(pbc)
pdf("net_benefit_5_year.pdf",width = 6,height = 6)
stdca(data=pbc, outcome="fustat", ttoutcome="futime", timepoint=5,
predictors=c("Stage","Riskscore","Nomogram"),
cmprsk=TRUE, smooth=TRUE,
xstop=0.5,intervention="FALSE")
dev.off()
setwd("J:/Project/最近项目/宫颈鳞癌/宫颈鳞癌 2021.5.22/宫颈鳞癌/代码/Figure 5")
dat<-read.table("uniq.symbol.txt",head=T,sep='\t',check.names = F,row.names = 1)
gene<-read.table("gene.txt",head=F,sep='\t')
gene
gene<-read.table("gene.txt",head=F,sep='\t')
gene
gene_expr<-dat[intersect(gene$V1,row.names(dat)),]
gene_expr[1:4,1:4]
gene_expr[1:5,1:4]
dim(gene_expr)
library(ggplot2)
library(dplyr)
Sys.setenv(LANGUAGE = "en") #显示英文报错信息
options(stringsAsFactors = FALSE) #禁止chr转成fa
tcga_gsva<-read.table("Cibersort_filter.txt",head=T,sep='\t',check.names = F,row.names = )
dim(tcga_gsva)
tcga_gsva[1:4,1:4]
tcga_gsva<-read.table("Cibersort_filter.txt",head=T,sep='\t',check.names = F,row.names = 1)
tcga_gsva[1:4,1:4]
dim(tcga_gsva)
tcga_expr<-gene_expr
gene <- genelist
immuscore <- function(gene){
y <- as.numeric(tcga_expr[gene,])
colnames <- colnames(tcga_gsva)
do.call(rbind,lapply(colnames, function(x){
dd <- cor.test(as.numeric(tcga_gsva[,x]),y,type="spearman")
data.frame(gene=gene,immune_cells=x,cor=dd$estimate,p.value=dd$p.value )
}))
}
data <- do.call(rbind,lapply(genelist,immuscore))
head(data)
genelist
genelist <- gene$V1
immuscore <- function(gene){
y <- as.numeric(tcga_expr[gene,])
colnames <- colnames(tcga_gsva)
do.call(rbind,lapply(colnames, function(x){
dd <- cor.test(as.numeric(tcga_gsva[,x]),y,type="spearman")
data.frame(gene=gene,immune_cells=x,cor=dd$estimate,p.value=dd$p.value )
}))
}
gene<-read.table("gene.txt",head=F,sep='\t',check.names = F)
gene
sample<-intersect(row.names(tcga_gsva),colnames(tcga_expr))
tcga_expr<-tcga_expr[,sample]
tcga_gsva<-tcga_gsva[sample,]
sample<-intersect(row.names(tcga_gsva),colnames(tcga_expr))
tcga_expr<-tcga_expr[,sample]
tcga_gsva<-tcga_gsva[sample,]
genelist <- gene$V1
immuscore <- function(gene){
y <- as.numeric(tcga_expr[gene,])
colnames <- colnames(tcga_gsva)
do.call(rbind,lapply(colnames, function(x){
dd <- cor.test(as.numeric(tcga_gsva[,x]),y,type="spearman")
data.frame(gene=gene,immune_cells=x,cor=dd$estimate,p.value=dd$p.value )
}))
}
data <- do.call(rbind,lapply(genelist,immuscore))
head(data)
data$pstar <- ifelse(data$p.value < 0.05,
ifelse(data$p.value < 0.01,"**","*"),
)
data$pstar[1:20]
ggplot(data, aes(immune_cells, gene)) +
geom_tile(aes(fill = cor), colour = "black",size=1)+
scale_fill_gradient2(low = "#2b8cbe",mid = "white",high = "#e41a1c")+
geom_text(aes(label=pstar),col ="black",size = 5)+
theme_minimal()+
theme(axis.title.x=element_blank()
axis.ticks.x=element_blank()
axis.title.y=element_blank()
axis.text.x = element_text(angle = 45, hjust = 1)
axis.text.y = element_text(size = 8))
labs(fill =paste0(" * p < 0.05","\n\n","** p < 0.01","\n\n","Correlation"))
ggplot(data, aes(immune_cells, gene)) +
geom_tile(aes(fill = cor), colour = "black",size=1)+
scale_fill_gradient2(low = "#2b8cbe",mid = "white",high = "#e41a1c")+
geom_text(aes(label=pstar),col ="black",size = 5)+
theme_minimal()+
theme(axis.title.x=element_blank(),
axis.ticks.x=element_blank(),
axis.title.y=element_blank(),
axis.text.x = element_text(angle = 45, hjust = 1),
axis.text.y = element_text(size = 8))
labs(fill =paste0(" * p < 0.05","\n\n","** p < 0.01","\n\n","Correlation"))
ggsave("correlation.pdf", width = 8, height = 4)
ggplot(data, aes(immune_cells, gene)) +
geom_tile(aes(fill = cor), colour = "black",size=1)+
scale_fill_gradient2(low = "#2b8cbe",mid = "white",high = "#e41a1c")+
geom_text(aes(label=pstar),col ="black",size = 5)+
theme_minimal()+
theme(axis.title.x=element_blank(),
axis.ticks.x=element_blank(),
axis.title.y=element_blank(),
axis.text.x = element_text(angle = 45, hjust = 1),
axis.text.y = element_text(size = 8))
labs(fill =paste0(" * p < 0.05","\n\n","** p < 0.01","\n\n","Correlation"))
ggsave("correlation.pdf", width = 8, height = 4)
dat <- read.table("uniq.symbol.txt",sep = "\t",row.names = 1,header = T,stringsAsFactors = F,check.names = F)
setwd("J:/Project/最近项目/宫颈鳞癌/宫颈鳞癌 2021.5.22/宫颈鳞癌/代码/Figure 6")
ann <- read.table("risk.txt",sep = "\t",row.names = 1,header = T,stringsAsFactors = F,check.names = F)
head(ann)
dat[1:4,1:4]
range(dat)
sample<-intersect(row.names(ann),colnames(dat))
length(sample)
dim(ann)
dat<-dat[,sample]
generateInputFileForSubMap <- function(in_gct, gct_file, cls_file, sam_info, type_name = "type"){
in_gct <- data.frame(GeneID=rownames(in_gct),
description="na",
in_gct,
stringsAsFactors = F,
check.names = F)
cat("#1.2\n", file = gct_file)
cat(nrow(in_gct),"\t",ncol(in_gct)-2,"\n", file = gct_file, append = T)
cat(paste(colnames(in_gct), collapse = "\t"),"\n", file = gct_file, append = T)
for(i in 1:nrow(in_gct)) cat(paste(in_gct[i,], collapse = "\t"),"\n", file = gct_file, append = T)
cat(nrow(sam_info),length(levels(factor(sam_info$rank))),1, "\n", file = cls_file )
cat("#", paste0(levels(factor(sam_info[, type_name])), collapse = " " ), "\n", file = cls_file, sep = "", append = T)
cat(as.numeric(factor(sam_info[, type_name])), file = cls_file, append = T)
}
skcm.immunotherapy.logNC <- read.table("skcm.immunotherapy.47samples.log2CountsNorm.txt",sep = "\t",row.names = 1,header = T,check.names = F,stringsAsFactors = F)
rownames(skcm.immunotherapy.logNC) <- toupper(rownames(skcm.immunotherapy.logNC))
skcm.immunotherapy.info <- read.table("skcm.immunotherapy.47sampleInfo.txt",sep = "\t",row.names = 1,header = T,check.names = F,stringsAsFactors = F)
skcm.immunotherapy.info <- skcm.immunotherapy.info[order(skcm.immunotherapy.info$label),]
skcm.immunotherapy.info$rank <- rep(c(1,2,3,4),times=as.character(table(skcm.immunotherapy.info$label))) #1: CTLA4_noR 2: CTLA4_R 3:PD1_noR 4:PD1_R
tmp <- read.table("expr_data_lowfiltered.txt",sep = "\t",check.names = F,stringsAsFactors = F,header = T,row.names = 1)
GENELIST <- intersect(rownames(tmp),rownames(skcm.immunotherapy.logNC))
sam_info <- skcm.immunotherapy.info
in_gct <- skcm.immunotherapy.logNC[GENELIST,rownames(skcm.immunotherapy.info)]
gct_file <- "skcm.immunotherapy.for.SubMap.gct"
cls_file <- "skcm.immunotherapy.for.SubMap.cls"
generateInputFileForSubMap(in_gct = in_gct, gct_file = gct_file, cls_file = cls_file, sam_info = sam_info, type_name = "rank")
samples.C1 <- rownames(ann[which(ann$ImmClust == "C1"),])
samples.C2 <- rownames(ann[which(ann$ImmClust == "C2"),])
sam_info <- data.frame("ImmClust"=c(samples.C1,samples.C2),row.names = c(samples.C1,samples.C2))
sam_info$rank <- rep(c(1,2),times=c(length(samples.C1),length(samples.C2)))
gct_file <- "Immune2.for.SubMap.gct"
cls_file <- "Immune2.for.SubMap.cls"
in_gct <- tmp[GENELIST,rownames(sam_info)]
generateInputFileForSubMap(in_gct = in_gct, gct_file = gct_file, cls_file = cls_file, sam_info = sam_info, type_name = "rank")
generateInputFileForSubMap <- function(in_gct, gct_file, cls_file, sam_info, type_name = "type"){
in_gct <- data.frame(GeneID=rownames(in_gct),
description="na",
in_gct,
stringsAsFactors = F,
check.names = F)
cat("#1.2\n", file = gct_file)
cat(nrow(in_gct),"\t",ncol(in_gct)-2,"\n", file = gct_file, append = T)
cat(paste(colnames(in_gct), collapse = "\t"),"\n", file = gct_file, append = T)
for(i in 1:nrow(in_gct)) cat(paste(in_gct[i,], collapse = "\t"),"\n", file = gct_file, append = T)
cat(nrow(sam_info),length(levels(factor(sam_info$rank))),1, "\n", file = cls_file )
cat("#", paste0(levels(factor(sam_info[, type_name])), collapse = " " ), "\n", file = cls_file, sep = "", append = T)
cat(as.numeric(factor(sam_info[, type_name])), file = cls_file, append = T)
}
skcm.immunotherapy.logNC <- read.table("skcm.immunotherapy.47samples.log2CountsNorm.txt",sep = "\t",row.names = 1,header = T,check.names = F,stringsAsFactors = F)
rownames(skcm.immunotherapy.logNC) <- toupper(rownames(skcm.immunotherapy.logNC))
skcm.immunotherapy.info <- read.table("skcm.immunotherapy.47sampleInfo.txt",sep = "\t",row.names = 1,header = T,check.names = F,stringsAsFactors = F)
skcm.immunotherapy.info <- skcm.immunotherapy.info[order(skcm.immunotherapy.info$label),]
skcm.immunotherapy.info$rank <- rep(c(1,2,3,4),times=as.character(table(skcm.immunotherapy.info$label))) #1: CTLA4_noR 2: CTLA4_R 3:PD1_noR 4:PD1_R
tmp <- dat
GENELIST <- intersect(rownames(tmp),rownames(skcm.immunotherapy.logNC))
sam_info <- skcm.immunotherapy.info
in_gct <- skcm.immunotherapy.logNC[GENELIST,rownames(skcm.immunotherapy.info)]
gct_file <- "skcm.immunotherapy.for.SubMap.gct"
cls_file <- "skcm.immunotherapy.for.SubMap.cls"
generateInputFileForSubMap(in_gct = in_gct, gct_file = gct_file, cls_file = cls_file, sam_info = sam_info, type_name = "rank")
samples.C1 <- rownames(ann[which(ann$ImmClust == "C1"),])
samples.C2 <- rownames(ann[which(ann$ImmClust == "C2"),])
sam_info <- data.frame("ImmClust"=c(samples.C1,samples.C2),row.names = c(samples.C1,samples.C2))
sam_info$rank <- rep(c(1,2),times=c(length(samples.C1),length(samples.C2)))
gct_file <- "Immune2.for.SubMap.gct"
cls_file <- "Immune2.for.SubMap.cls"
in_gct <- tmp[GENELIST,rownames(sam_info)]
generateInputFileForSubMap(in_gct = in_gct, gct_file = gct_file, cls_file = cls_file, sam_info = sam_info, type_name = "rank")
setwd("J:/Project/最近项目/宫颈鳞癌/宫颈鳞癌 2021.5.22/宫颈鳞癌/代码/Supplementary Figure")
library(survivalROC)
rt=read.table("DFS_risk.txt",header=T,sep="\t",check.names=F,row.names=1)
pdf(file="ROC.pdf",width=6,height=6)
par(oma=c(0.5,1,0,1),font.lab=1.5,font.axis=1.5)
roc=survivalROC(Stime=rt$futime, status=rt$fustat, marker = rt$riskScore,
predict.time =1, method="KM")
plot(roc$FP, roc$TP, type="l", xlim=c(0,1), ylim=c(0,1),col='red',
xlab="False positive rate", ylab="True positive rate",
main=paste("ROC curve (", "AUC = ",sprintf("%.3f",roc$AUC),")"),
lwd = 2, cex.main=1.3, cex.lab=1.2, cex.axis=1.2, font=1.2)
abline(0,1)
dev.off()
roc$AUC
library(survivalROC)
rt=read.table("DFS_risk.txt",header=T,sep="\t",check.names=F,row.names=1)
pdf(file="ROC.pdf",width=6,height=6)
par(oma=c(0.5,1,0,1),font.lab=1.5,font.axis=1.5)
roc=survivalROC(Stime=rt$futime, status=rt$fustat, marker = rt$riskScore,
predict.time =5, method="KM")
plot(roc$FP, roc$TP, type="l", xlim=c(0,1), ylim=c(0,1),col='red',
xlab="False positive rate", ylab="True positive rate",
main=paste("ROC curve (", "AUC = ",sprintf("%.3f",roc$AUC),")"),
lwd = 2, cex.main=1.3, cex.lab=1.2, cex.axis=1.2, font=1.2)
abline(0,1)
dev.off()
roc$AUC
library(survivalROC)
rt=read.table("DFS_risk.txt",header=T,sep="\t",check.names=F,row.names=1)
pdf(file="ROC.pdf",width=6,height=6)
par(oma=c(0.5,1,0,1),font.lab=1.5,font.axis=1.5)
roc=survivalROC(Stime=rt$futime, status=rt$fustat, marker = rt$riskScore,
predict.time =3, method="KM")
plot(roc$FP, roc$TP, type="l", xlim=c(0,1), ylim=c(0,1),col='red',
xlab="False positive rate", ylab="True positive rate",
main=paste("ROC curve (", "AUC = ",sprintf("%.3f",roc$AUC),")"),
lwd = 2, cex.main=1.3, cex.lab=1.2, cex.axis=1.2, font=1.2)
abline(0,1)
dev.off()
roc$AUC
library(survivalROC)
rt=read.table("DFS_risk.txt",header=T,sep="\t",check.names=F,row.names=1)
pdf(file="ROC.pdf",width=6,height=6)
par(oma=c(0.5,1,0,1),font.lab=1.5,font.axis=1.5)
roc=survivalROC(Stime=rt$futime, status=rt$fustat, marker = rt$riskScore,
predict.time =5, method="KM")
plot(roc$FP, roc$TP, type="l", xlim=c(0,1), ylim=c(0,1),col='red',
xlab="False positive rate", ylab="True positive rate",
main=paste("ROC curve (", "AUC = ",sprintf("%.3f",roc$AUC),")"),
lwd = 2, cex.main=1.3, cex.lab=1.2, cex.axis=1.2, font=1.2)
abline(0,1)
dev.off()
library(survivalROC)
rt=read.table("DFS_risk.txt",header=T,sep="\t",check.names=F,row.names=1)
pdf(file="ROC.pdf",width=6,height=6)
par(oma=c(0.5,1,0,1),font.lab=1.5,font.axis=1.5)
roc=survivalROC(Stime=rt$futime, status=rt$fustat, marker = rt$riskScore,
predict.time =60, method="KM")
plot(roc$FP, roc$TP, type="l", xlim=c(0,1), ylim=c(0,1),col='red',
xlab="False positive rate", ylab="True positive rate",
main=paste("ROC curve (", "AUC = ",sprintf("%.3f",roc$AUC),")"),
lwd = 2, cex.main=1.3, cex.lab=1.2, cex.axis=1.2, font=1.2)
abline(0,1)
dev.off()
roc$AUC
library(survivalROC)
rt=read.table("DFS_risk.txt",header=T,sep="\t",check.names=F,row.names=1)
pdf(file="ROC.pdf",width=6,height=6)
par(oma=c(0.5,1,0,1),font.lab=1.5,font.axis=1.5)
roc=survivalROC(Stime=rt$futime, status=rt$fustat, marker = rt$riskScore,
predict.time =12, method="KM")
plot(roc$FP, roc$TP, type="l", xlim=c(0,1), ylim=c(0,1),col='red',
xlab="False positive rate", ylab="True positive rate",
main=paste("ROC curve (", "AUC = ",sprintf("%.3f",roc$AUC),")"),
lwd = 2, cex.main=1.3, cex.lab=1.2, cex.axis=1.2, font=1.2)
abline(0,1)
dev.off()
roc$AUC
