# Supplementary material for: An Immune-Gene-Based Classifier Predicts Prognosis in Patients With Cervical Squamous Cell Carcinoma
Source: Front Mol Biosci. 2021 Jul 5;8:679474. doi: 10.3389/fmolb.2021.679474 (PMC8289438; doi:10.3389/fmolb.2021.679474)
Supplement: Supplementary file 18 [file Table9.XLS]

## Sheet: LTBR.cox (2)
cancer	HR	HR.95L	HR.95H	pvalue
BRCA	1.07219	0.831444	1.38263	0.591122
CESC	1.55846	1.04549	2.32312	0.0293789
OV	1.16573	0.948535	1.43265	0.144925
UCEC	0.764424	0.562203	1.03938	0.0866076
UCS	0.945885	0.68598	1.30426	0.734305

## Sheet: ISG20.cox (2)
cancer	HR	HR.95L	HR.95H	pvalue
BRCA	0.880283	0.742947	1.043	0.140636
CESC	0.662664	0.517926	0.847849	0.00106537
OV	0.78833	0.68377	0.908879	0.00105297
UCEC	0.979381	0.784562	1.22258	0.853923
UCS	0.939769	0.649928	1.35887	0.741274

## Sheet: ICOS.cox (2)
cancer	HR	HR.95L	HR.95H	pvalue
BRCA	0.900979	0.780094	1.0406	0.156018
CESC	0.696294	0.540383	0.897189	0.00512961
OV	0.765851	0.62321	0.941139	0.0111853
UCEC	0.671148	0.485505	0.927774	0.0157895
UCS	0.790999	0.403988	1.54876	0.494029

## Sheet: expTime (2)
id	futime	fustat	ICOS	ISG20	ANGPTL4	SBDS	LTBR	Type	CancerType
TCGA-C8-A275-01A	1	0	3.07866	4.77451	2.49163	7.13812	5.48462	Tumor	BRCA
TCGA-BH-A1F8-01A	1	1	1.02901	2.67909	1.21145	8.73062	5.56202	Tumor	BRCA
TCGA-AC-A7VC-01A	1	0	0.0809823	2.12778	5.41675	6.76603	5.53837	Tumor	BRCA
TCGA-AN-A0AM-01A	5	0	2.09341	4.06181	3.9746	6.59517	6.27166	Tumor	BRCA
TCGA-C8-A1HJ-01A	5	0	1.78889	2.26593	3.12013	7.44278	5.63215	Tumor	BRCA
TCGA-PL-A8LX-01A	5	0	0.412074	3.7195	1.80377	7.34991	6.05145	Tumor	BRCA
TCGA-AN-A041-01A	7	0	0.472983	3.69034	1.69272	6.96417	5.92325	Tumor	BRCA
TCGA-PL-A8LY-01A	8	0	0.724127	4.1336	3.9741	7.06018	5.52603	Tumor	BRCA
TCGA-AN-A0XP-01A	9	0	0.400823	4.5637	3.21798	7.63198	5.74384	Tumor	BRCA
TCGA-AN-A0AR-01A	10	0	0.554019	4.58957	2.079	6.93263	7.32915	Tumor	BRCA
TCGA-AN-A0AT-01A	10	0	1.68774	3.74433	4.45915	7.85207	5.9525	Tumor	BRCA
TCGA-AN-A046-01A	10	0	2.76477	3.14633	2.928	6.88029	5.53071	Tumor	BRCA
TCGA-AN-A0FV-01A	10	0	0.326434	3.10322	3.9158	7.08476	4.81436	Tumor	BRCA
TCGA-AN-A0FX-01A	10	0	0.788244	2.82797	5.90085	7.07805	6.09724	Tumor	BRCA
TCGA-AN-A0FZ-01A	10	0	0.1924	2.5505	3.71504	7.19959	6.22702	Tumor	BRCA
TCGA-AN-A03X-01A	10	0	0.580182	2.97532	2.88771	7.53144	5.71728	Tumor	BRCA
TCGA-AN-A0XR-01A	10	0	1.05203	3.32159	3.57428	7.25574	5.79946	Tumor	BRCA
TCGA-AN-A0FY-01A	10	0	1.24915	2.486	4.77586	7.69702	5.68282	Tumor	BRCA
TCGA-AN-A0AS-01A	10	0	0.770923	3.27391	6.64792	7.00713	6.01754	Tumor	BRCA
TCGA-AN-A03Y-01A	10	0	1.64589	2.25726	3.37757	7.07618	5.25068	Tumor	BRCA
TCGA-AN-A0XT-01A	10	0	0.455769	1.83362	2.65913	7.41754	6.1615	Tumor	BRCA
TCGA-AN-A0XS-01A	10	0	1.70608	2.60976	5.13365	7.20183	5.91288	Tumor	BRCA
TCGA-AN-A0XN-01A	10	0	1.32702	2.09178	5.2568	7.97249	5.23683	Tumor	BRCA
TCGA-AN-A0XU-01A	10	0	1.46687	4.03565	6.18112	6.91194	5.64264	Tumor	BRCA
TCGA-AN-A0FW-01A	11	0	0.928037	1.6486	4.79649	7.17255	5.76912	Tumor	BRCA
TCGA-AN-A0G0-01A	16	0	0.999687	3.52965	6.86922	6.64704	6.9989	Tumor	BRCA
TCGA-AN-A049-01A	19	0	1.58528	3.52906	5.12814	6.81193	5.51878	Tumor	BRCA
TCGA-E9-A244-01A	21	0	1.27352	3.21696	2.94744	7.794	6.59875	Tumor	BRCA
TCGA-E9-A5FL-01A	24	0	0.946332	2.65827	6.26546	6.72808	6.36663	Tumor	BRCA
TCGA-E9-A245-01A	26	1	0.562817	3.04471	2.07292	7.17821	5.93502	Tumor	BRCA
TCGA-A8-A08A-01A	30	0	1.01493	2.15839	3.52747	6.643	5.30654	Tumor	BRCA
TCGA-A8-A0A7-01A	30	0	3.66476	4.14813	2.8511	7.16983	5.06771	Tumor	BRCA
TCGA-A8-A09W-01A	30	0	0.80305	1.30791	2.17237	7.15755	5.84178	Tumor	BRCA
TCGA-A8-A08L-01A	30	1	2.38584	2.89513	2.83852	6.5802	4.28602	Tumor	BRCA
TCGA-A8-A08R-01A	30	0	3.18763	3.83499	3.449	7.68118	5.62104	Tumor	BRCA
TCGA-A8-A06Q-01A	31	0	0.244549	1.68145	0.869308	6.88785	4.8242	Tumor	BRCA
TCGA-A8-A09N-01A	31	0	1.40047	1.80771	3.10161	8.04491	5.92172	Tumor	BRCA
TCGA-A8-A06Z-01A	31	0	0.124664	2.41053	3.67993	7.21008	6.11825	Tumor	BRCA
TCGA-AC-A8OQ-01A	34	0	2.56088	3.90978	6.02345	6.79564	5.40872	Tumor	BRCA
TCGA-E9-A1RD-01A	34	0	0.725239	2.93055	1.30073	7.35168	5.40669	Tumor	BRCA
TCGA-AC-A8OR-01A	40	0	0.142255	3.03294	3.65064	7.26562	6.62193	Tumor	BRCA
TCGA-D8-A27P-01A	49	0	0.555102	2.44163	3.86988	7.21925	5.95428	Tumor	BRCA
TCGA-AC-A6NO-01A	51	0	0.672174	2.75819	2.66324	6.98618	5.759	Tumor	BRCA
TCGA-AN-A04D-01A	52	0	0.185478	2.53802	1.84114	6.31958	6.06306	Tumor	BRCA
TCGA-AN-A04C-01A	54	0	0.817045	3.23899	3.66778	6.2884	6.2004	Tumor	BRCA
TCGA-E9-A248-01A	59	0	3.51934	4.60139	1.44459	6.47094	4.6534	Tumor	BRCA
TCGA-OK-A5Q2-01A	64	0	1.94093	3.74933	5.28141	7.37347	6.08959	Tumor	BRCA
TCGA-AC-A8OS-01A	70	0	1.48237	1.72627	4.10152	7.07911	5.64222	Tumor	BRCA
TCGA-BH-A0HL-01A	72	0	0.0639604	2.97822	2.02417	7.66291	6.26568	Tumor	BRCA
TCGA-BH-A0HO-01A	76	0	0.908467	4.23322	2.49463	7.15202	5.69588	Tumor	BRCA
TCGA-E9-A1R3-01A	78	0	1.07581	3.12961	3.3073	7.22143	5.4778	Tumor	BRCA
TCGA-BH-A0DS-01A	78	0	0.806666	2.11347	5.10274	7.20841	5.62674	Tumor	BRCA
TCGA-AQ-A54N-01A	78	0	0.357525	3.92382	4.92458	6.06393	5.93197	Tumor	BRCA
TCGA-HN-A2NL-01A	79	0	2.11047	2.66675	1.78312	6.79178	6.45836	Tumor	BRCA
TCGA-LL-A6FQ-01A	80	0	0.373089	2.96351	3.815	6.4723	5.70162	Tumor	BRCA
TCGA-AR-A24P-01A	84	0	1.18073	1.87727	2.96603	7.29034	5.89045	Tumor	BRCA
TCGA-AN-A04A-01A	90	0	0.374455	3.56023	3.49719	7.41857	5.33856	Tumor	BRCA
TCGA-E9-A1R5-01A	92	0	0.518573	1.48957	2.99585	7.54135	5.50439	Tumor	BRCA
TCGA-BH-A0DQ-01A	98	0	0.776971	2.27397	4.92064	7.2224	5.03635	Tumor	BRCA
TCGA-UU-A93S-01A	116	1	0.762324	4.18176	4.88817	6.85987	5.43849	Tumor	BRCA
TCGA-E2-A1IL-01A	118	0	0.461983	2.79772	5.56241	7.34192	5.96525	Tumor	BRCA
TCGA-BH-A0E0-01A	134	0	1.62419	2.06182	4.0452	7.11496	5.20682	Tumor	BRCA
TCGA-BH-A18G-01A	149	0	0.441122	3.5188	6.90852	7.19459	6.33678	Tumor	BRCA
TCGA-A2-A0CU-01A	158	1	0.5449	2.54729	3.84332	6.88349	6.25182	Tumor	BRCA
TCGA-BH-A6R9-01A	160	0	2.15087	3.01628	5.46388	7.42025	6.29706	Tumor	BRCA
TCGA-AR-A0TR-01A	160	1	1.3235	1.41065	3.40398	7.71561	4.49013	Tumor	BRCA
TCGA-AN-A0XV-01A	162	0	1.79907	2.85377	2.38759	7.59368	5.87869	Tumor	BRCA
TCGA-AN-A0XL-01A	163	0	0.683503	1.31562	5.46154	7.63596	5.76277	Tumor	BRCA
TCGA-BH-A0RX-01A	170	0	3.22459	4.30724	4.66486	6.99989	6.06706	Tumor	BRCA
TCGA-AN-A0XW-01A	170	0	3.27765	3.2426	1.399	7.18437	5.45989	Tumor	BRCA
TCGA-AQ-A0Y5-01A	172	1	0.734498	2.5626	5.13216	7.8282	6.26022	Tumor	BRCA
TCGA-AN-A0FF-01A	172	0	1.23253	3.47216	3.81218	6.97581	5.35631	Tumor	BRCA
TCGA-BH-A0HK-01A	178	0	0.448445	1.66034	4.18263	6.89405	5.30837	Tumor	BRCA
TCGA-E9-A1R4-01A	186	0	3.21157	3.8615	4.3517	7.76591	4.46081	Tumor	BRCA
TCGA-EW-A1PC-01B	187	0	1.13181	3.69917	3.45295	6.36762	5.43416	Tumor	BRCA
TCGA-AN-A0FD-01A	196	0	1.12309	2.46394	2.13165	6.85707	5.42508	Tumor	BRCA
TCGA-AC-A3EH-01A	197	1	0.288356	2.61588	3.01699	6.67841	5.85702	Tumor	BRCA
TCGA-E9-A1RF-01A	200	0	1.9163	2.85127	3.01359	7.09781	5.4479	Tumor	BRCA
TCGA-AN-A0FS-01A	210	0	0.181618	2.16798	3.60304	7.44836	5.40006	Tumor	BRCA
TCGA-AN-A0FK-01A	213	0	0.20801	2.95852	2.18324	6.89833	5.58761	Tumor	BRCA
TCGA-AN-A0FT-01A	214	0	0.422841	1.731	3.49918	5.98191	5.28199	Tumor	BRCA
TCGA-B6-A400-01A	215	0	2.92571	3.62967	3.64801	7.06212	7.09317	Tumor	BRCA
TCGA-E9-A249-01A	217	0	1.21598	1.90758	3.17378	7.21178	5.24229	Tumor	BRCA
TCGA-AN-A0FN-01A	218	0	2.57606	3.20985	5.03184	7.49556	5.49642	Tumor	BRCA
TCGA-A2-A4RW-01A	222	0	1.49732	3.58138	5.45101	6.84265	5.95324	Tumor	BRCA
TCGA-BH-A18T-01A	224	1	1.56421	1.84393	4.26916	6.75677	8.00647	Tumor	BRCA
TCGA-AN-A0AK-01A	224	0	1.32407	2.92685	2.37927	7.62945	6.77294	Tumor	BRCA
TCGA-GI-A2C8-01A	225	0	1.00459	3.8996	1.41268	7.64827	5.62224	Tumor	BRCA
TCGA-AN-A0AL-01A	227	0	1.67269	4.63621	3.56429	7.31126	6.49728	Tumor	BRCA
TCGA-LL-A73Z-01A	227	1	2.51365	4.06399	5.38832	7.13366	5.72716	Tumor	BRCA
TCGA-AN-A0FL-01A	231	0	0.145727	2.02406	4.61601	7.39832	4.45767	Tumor	BRCA
TCGA-EW-A1P8-01A	239	1	2.04422	3.07037	5.87701	6.65817	7.29426	Tumor	BRCA
TCGA-AN-A0FJ-01A	242	0	1.30011	2.46809	5.85236	7.14868	6.06182	Tumor	BRCA
TCGA-A1-A0SM-01A	242	0	0.131492	4.66092	1.95906	7.34634	6.44217	Tumor	BRCA
TCGA-A8-A07S-01A	243	0	0.669896	2.69206	2.96465	6.75829	5.74297	Tumor	BRCA
TCGA-AC-A7VB-01A	250	0	0.307328	3.04799	3.79297	7.14582	6.45002	Tumor	BRCA
TCGA-E2-A56Z-01A	252	0	0.669177	3.80361	2.68945	7.41733	6.11421	Tumor	BRCA
TCGA-A2-A0T2-01A	255	1	1.2222	2.85431	7.65605	7.59556	5.35191	Tumor	BRCA
TCGA-EW-A1IY-01A	258	0	3.83797	2.72282	1.82436	7.53798	4.69461	Tumor	BRCA
TCGA-A1-A0SB-01A	259	0	0	3.57716	2.38643	7.03356	5.69934	Tumor	BRCA
TCGA-E2-A1LK-01A	266	1	0.38264	3.82469	5.49144	7.39889	7.04305	Tumor	BRCA
TCGA-A7-A6VY-01A	266	0	3.12202	4.24769	6.20262	7.27468	6.29375	Tumor	BRCA
TCGA-OL-A97C-01A	271	0	1.27172	2.93907	6.37196	7.10676	5.99877	Tumor	BRCA
TCGA-A8-A07R-01A	273	0	0.733444	4.23521	3.79079	6.3595	6.15518	Tumor	BRCA
TCGA-A8-A09R-01A	273	0	2.35738	3.83841	1.76869	7.12088	6.07249	Tumor	BRCA
TCGA-A8-A079-01A	274	0	0.4861	2.58493	3.19076	6.60082	6.03337	Tumor	BRCA
TCGA-E2-A15K-06A	275	0	0.094757	2.34271	2.15328	6.94113	6.00616	Tumor	BRCA
TCGA-E2-A15K-01A	275	0	2.11247	2.55816	4.16446	6.96622	6.09973	Tumor	BRCA
TCGA-A7-A6VW-01A	285	0	0.365706	4.65697	4.24958	6.72743	7.29012	Tumor	BRCA
TCGA-BH-AB28-01A	287	0	1.67077	3.33516	4.72361	7.1147	6.03479	Tumor	BRCA
TCGA-E9-A2JT-01A	288	0	4.64756	5.44383	4.09225	6.86346	4.98044	Tumor	BRCA
TCGA-E2-A15O-01A	289	0	1.26103	2.99116	3.61242	7.22763	5.92899	Tumor	BRCA
TCGA-BH-A6R8-01A	293	0	2.79196	4.56177	2.18654	7.35393	5.64697	Tumor	BRCA
TCGA-BH-A0E6-01A	293	0	0.916907	3.17999	5.05534	7.24934	6.07142	Tumor	BRCA
TCGA-BH-A8FY-01A	295	1	0.188805	3.18054	3.03243	6.7727	5.64474	Tumor	BRCA
TCGA-C8-A278-01A	297	0	3.09909	3.71931	0.664638	6.96728	4.8136	Tumor	BRCA
TCGA-E9-A1NI-01A	300	0	0.779696	2.85832	3.80584	7.24721	5.84371	Tumor	BRCA
TCGA-D8-A1Y1-01A	302	1	0.552571	1.98253	3.04698	7.85224	5.67036	Tumor	BRCA
TCGA-PL-A8LZ-01A	302	0	4.1775	5.87142	4.99447	6.95411	5.82131	Tumor	BRCA
TCGA-5T-A9QA-01A	303	0	0.230327	5.42704	1.2862	6.70396	6.42053	Tumor	BRCA
TCGA-AN-A0AJ-01A	303	0	3.01814	3.37635	3.2845	6.56694	4.59362	Tumor	BRCA
TCGA-A8-A099-01A	304	0	1.20195	3.77522	1.43791	8.58847	5.73162	Tumor	BRCA
TCGA-A8-A07O-01A	304	0	1.59642	2.03209	3.75975	7.34401	6.56329	Tumor	BRCA
TCGA-A8-A07W-01A	304	0	1.33701	2.39483	3.68449	7.42197	6.35423	Tumor	BRCA
TCGA-A8-A09A-01A	304	0	2.01684	2.16266	3.36197	7.99101	5.96177	Tumor	BRCA
TCGA-D8-A27R-01A	307	0	1.35307	3.2607	3.41385	7.58653	6.44942	Tumor	BRCA
TCGA-A7-A6VV-01A	313	0	1.70779	3.72487	5.89007	7.17493	6.14816	Tumor	BRCA
TCGA-A7-A3J0-01A	313	0	1.69705	2.37636	3.43333	7.21529	6.00206	Tumor	BRCA
TCGA-A7-A6VX-01A	317	0	1.17616	4.19453	3.81652	7.80304	6.46244	Tumor	BRCA
TCGA-C8-A1HL-01A	317	0	0.470131	3.07498	0.949008	7.18008	5.60271	Tumor	BRCA
TCGA-EW-A1PE-01A	320	0	2.92985	5.22035	4.28745	7.07103	5.80658	Tumor	BRCA
TCGA-BH-A42T-01A	320	1	1.54537	4.22561	6.33467	5.96167	6.12491	Tumor	BRCA
TCGA-AR-A5QQ-01A	322	1	3.76107	4.36579	7.1581	7.70904	6.67332	Tumor	BRCA
TCGA-A2-A25F-01A	322	0	5.52819	3.85583	5.83567	8.22332	5.79315	Tumor	BRCA
TCGA-A7-A3IZ-01A	322	0	0.101442	3.84606	1.72378	6.25034	6.03952	Tumor	BRCA
TCGA-LD-A9QF-01A	323	0	3.65925	4.00194	3.95956	7.09669	5.77557	Tumor	BRCA
TCGA-A7-A5ZW-01A	326	0	1.75172	2.65833	2.50395	7.68257	5.55929	Tumor	BRCA
TCGA-BH-A0GZ-01A	328	0	0.456523	2.63574	2.25351	6.8783	5.1715	Tumor	BRCA
TCGA-C8-A1HF-01A	332	0	3.07903	3.61995	1.23219	7.28565	5.51814	Tumor	BRCA
TCGA-A8-A07P-01A	334	0	1.13302	2.99403	2.19458	7.43765	5.48618	Tumor	BRCA
TCGA-A7-A5ZX-01A	336	0	0.111162	2.3999	3.53057	7.42116	5.85102	Tumor	BRCA
TCGA-E2-A15M-01A	336	1	3.61345	2.82424	5.17843	7.35049	4.97187	Tumor	BRCA
TCGA-E2-A1IU-01A	337	0	0.60176	3.80248	3.85624	7.58374	5.98653	Tumor	BRCA
TCGA-E9-A1R6-01A	339	0	0.998596	3.25429	1.85033	7.69475	6.38417	Tumor	BRCA
TCGA-A7-A3J1-01A	343	0	2.5025	4.08227	4.46958	6.921	5.76408	Tumor	BRCA
TCGA-C8-A1HI-01A	343	0	0.413004	3.09993	1.55339	7.93689	5.02835	Tumor	BRCA
TCGA-A7-A3IY-01A	345	0	0.993366	3.96901	2.21774	7.50259	5.77675	Tumor	BRCA
TCGA-C8-A1HG-01A	345	0	2.96546	3.63431	0.864032	7.52714	6.88237	Tumor	BRCA
TCGA-W8-A86G-01A	347	0	0.226071	2.87936	4.99205	7.30336	5.87755	Tumor	BRCA
TCGA-4H-AAAK-01A	348	0	1.21419	2.26116	3.57038	7.26796	5.84585	Tumor	BRCA
TCGA-AC-A62V-01A	348	1	0.0302089	2.64267	4.55763	6.2789	6.36323	Tumor	BRCA
TCGA-AO-A1KS-01A	350	0	2.38539	1.58156	2.68075	7.32911	5.20144	Tumor	BRCA
TCGA-JL-A3YX-01A	352	0	0.145934	3.23361	4.6445	7.18584	5.7489	Tumor	BRCA
TCGA-C8-A12N-01A	358	0	1.40896	2.58468	3.96576	7.4033	5.6212	Tumor	BRCA
TCGA-C8-A12M-01A	358	0	1.28059	1.43701	1.3554	7.2932	5.53835	Tumor	BRCA
TCGA-C8-A12P-01A	358	0	1.6893	3.01908	1.10456	7.50215	5.99477	Tumor	BRCA
TCGA-JL-A3YW-01A	360	0	2.73637	3.60769	7.4672	7.4783	6.04499	Tumor	BRCA
TCGA-B6-A0I9-01A	362	1	1.18959	2.45717	3.7602	6.87207	5.51629	Tumor	BRCA
TCGA-C8-A12L-01A	363	0	1.40265	3.37234	7.72448	7.76419	6.52195	Tumor	BRCA
TCGA-A7-A426-01A	364	0	0.837318	3.069	5.29254	7.16669	5.98333	Tumor	BRCA
TCGA-BH-A1EV-01A	365	1	0.0650551	3.03406	3.98143	6.20828	4.84896	Tumor	BRCA
TCGA-A8-A0A1-01A	365	0	3.3154	2.02342	4.19295	7.31085	5.6473	Tumor	BRCA
TCGA-A8-A08I-01A	365	0	3.37982	3.8442	0.955766	5.90114	5.55908	Tumor	BRCA
TCGA-A8-A07J-01A	365	0	0.799405	2.69229	5.09609	7.3472	5.86766	Tumor	BRCA
TCGA-A8-A097-01A	365	0	1.28012	3.04443	3.11717	7.05492	5.42057	Tumor	BRCA
TCGA-A8-A09B-01A	365	0	0.365226	2.96496	4.68324	7.19409	5.82421	Tumor	BRCA
TCGA-D8-A1JF-01A	366	0	1.77561	1.84865	3.77088	7.68236	4.99366	Tumor	BRCA
TCGA-C8-A1HK-01A	366	0	1.99581	2.34882	0.754361	7.06772	4.93501	Tumor	BRCA
TCGA-A7-A5ZV-01A	368	0	0.184339	3.52997	7.00633	8.23305	6.84485	Tumor	BRCA
TCGA-C8-A130-01A	370	0	1.42483	2.50524	3.29877	7.10775	5.95266	Tumor	BRCA
TCGA-D8-A1JS-01A	371	0	0.153165	4.05468	1.08	7.89283	5.86662	Tumor	BRCA
TCGA-EW-A1IW-01A	371	0	1.37832	3.97846	4.64081	7.47498	5.94403	Tumor	BRCA
TCGA-D8-A27W-01A	373	0	1.26433	3.55724	3.94899	7.0407	6.18345	Tumor	BRCA
TCGA-AC-A6IX-01A	373	0	1.57096	3.37656	5.25526	7.36769	6.12602	Tumor	BRCA
TCGA-AC-A6IX-06A	373	0	2.98435	4.02426	1.95245	7.12966	5.70758	Tumor	BRCA
TCGA-C8-A1HM-01A	375	0	3.90707	5.20675	2.41798	6.54028	5.99953	Tumor	BRCA
TCGA-C8-A1HE-01A	375	0	0.687946	2.83581	1.6481	7.35892	5.55893	Tumor	BRCA
TCGA-C8-A1HO-01A	375	0	0.562727	4.02013	0.492326	7.30656	5.65039	Tumor	BRCA
TCGA-AN-A0XO-01A	375	0	0.0490861	2.20724	5.69451	7.2257	5.97949	Tumor	BRCA
TCGA-E9-A295-01A	375	0	0.930537	2.08576	2.74582	7.04206	5.91091	Tumor	BRCA
TCGA-C8-A26X-01A	376	0	2.09371	4.25129	6.57784	6.99656	5.84565	Tumor	BRCA
TCGA-LL-A7T0-01A	376	0	1.46299	3.43449	2.40603	6.78509	5.73678	Tumor	BRCA
TCGA-D8-A1XC-01A	377	1	0.0753593	2.91637	3.05067	7.08264	5.51078	Tumor	BRCA
TCGA-C8-A137-01A	379	0	0.56897	3.18892	4.03492	7.97928	5.82344	Tumor	BRCA
TCGA-C8-A138-01A	380	0	1.987	2.95347	1.68974	6.51573	4.954	Tumor	BRCA
TCGA-C8-A8HQ-01A	380	0	2.41927	4.58867	2.24541	7.20438	6.44458	Tumor	BRCA
TCGA-D8-A27V-01A	381	0	1.26195	2.4135	1.22621	7.40633	4.98558	Tumor	BRCA
TCGA-C8-A26W-01A	381	0	2.02845	3.74924	2.66137	7.20194	5.36391	Tumor	BRCA
TCGA-C8-A12Z-01A	382	0	0.320412	2.87633	4.54353	7.32003	5.35631	Tumor	BRCA
TCGA-C8-A134-01A	383	0	2.84394	3.36775	2.76038	8.19836	5.66513	Tumor	BRCA
TCGA-C8-A132-01A	383	0	2.89235	3.34749	2.8409	7.53236	5.55177	Tumor	BRCA
TCGA-C8-A12W-01A	385	0	1.52888	3.34621	3.72646	7.03969	6.37136	Tumor	BRCA
TCGA-C8-A12V-01A	385	0	4.79135	4.81753	2.31804	6.77767	5.28709	Tumor	BRCA
TCGA-D8-A73W-01A	385	1	0.935372	4.87206	4.86123	7.63393	5.88302	Tumor	BRCA
TCGA-C8-A12X-01A	385	0	0.413431	3.14129	1.13326	7.11402	5.75413	Tumor	BRCA
TCGA-C8-A12Q-01A	385	1	1.46783	3.14955	3.70543	7.76234	6.30984	Tumor	BRCA
TCGA-C8-A12O-01A	385	0	2.01078	2.75755	3.97021	7.75008	5.97551	Tumor	BRCA
TCGA-C8-A12U-01A	385	0	1.91555	3.94359	4.01815	7.10029	4.96909	Tumor	BRCA
TCGA-BH-A0HU-01A	392	0	0.663228	2.05813	3.30199	6.92798	6.17209	Tumor	BRCA
TCGA-E2-A15H-01A	393	0	0.69481	3.57598	2.10317	6.87898	6.40315	Tumor	BRCA
TCGA-C8-A135-01A	393	0	1.12681	2.54626	3.99274	6.94768	5.13279	Tumor	BRCA
TCGA-C8-A3M8-01A	394	0	0.119816	3.18396	4.19886	6.76701	6.10527	Tumor	BRCA
TCGA-C8-A1HN-01A	394	0	0.842071	2.41324	1.15723	8.20691	6.65559	Tumor	BRCA
TCGA-LL-A5YM-01A	394	0	0.272208	5.7975	6.19871	6.47728	4.90655	Tumor	BRCA
TCGA-D8-A1XU-01A	395	0	0.942015	2.43765	5.36414	6.85466	5.24023	Tumor	BRCA
TCGA-A8-A0A4-01A	396	0	0.603712	2.43214	2.01635	7.7803	5.66229	Tumor	BRCA
TCGA-C8-A8HP-01A	396	0	2.63245	3.65586	5.02413	6.67875	5.22418	Tumor	BRCA
TCGA-A8-A06P-01A	396	0	0.553091	2.82461	4.46861	7.61273	6.11207	Tumor	BRCA
TCGA-A8-A086-01A	396	0	0.668164	2.20291	3.27907	7.16352	5.44891	Tumor	BRCA
TCGA-A8-A06O-01A	396	0	1.72374	2.39759	3.70662	6.95196	5.46763	Tumor	BRCA
TCGA-D8-A27H-01A	397	0	0.927165	5.32004	4.96429	7.82855	6.61427	Tumor	BRCA
TCGA-D8-A27T-01A	398	0	2.02935	3.2593	3.56689	7.00937	6.04493	Tumor	BRCA
TCGA-LD-A74U-01A	402	0	1.11308	2.21559	5.78642	7.15395	5.90042	Tumor	BRCA
TCGA-EW-A1J2-01A	403	0	1.57895	2.87277	4.55873	7.3795	5.73487	Tumor	BRCA
TCGA-D8-A140-01A	403	0	2.65243	3.57545	2.49173	6.94598	5.91574	Tumor	BRCA
TCGA-LD-A7W6-01A	404	0	1.66789	3.91185	3.27306	7.16258	5.86605	Tumor	BRCA
TCGA-D8-A1JT-01A	405	0	0.928855	2.75454	3.16803	7.64572	4.86925	Tumor	BRCA
TCGA-A7-A3RF-01A	408	0	0.0267233	3.49856	5.01168	7.15654	6.07812	Tumor	BRCA
TCGA-C8-A8HR-01A	408	0	2.16546	3.70495	3.31776	6.9855	5.8835	Tumor	BRCA
TCGA-D8-A27G-01A	409	0	2.41332	3.37952	3.85637	7.2578	5.86603	Tumor	BRCA
TCGA-D8-A145-01A	410	0	1.06877	3.45554	3.25554	7.31657	5.76194	Tumor	BRCA
TCGA-D8-A27M-01A	410	0	3.54274	4.29133	4.00327	7.98935	6.26906	Tumor	BRCA
TCGA-C8-A131-01A	411	0	1.05102	2.60448	5.64095	6.35565	5.94027	Tumor	BRCA
TCGA-GM-A5PV-01A	412	0	0.843761	2.35131	3.38698	7.36616	5.4919	Tumor	BRCA
TCGA-AC-A6IW-01A	413	0	3.66189	4.0552	2.49532	6.59253	7.20827	Tumor	BRCA
TCGA-BH-A0HP-01A	414	0	0.851733	2.33913	2.19722	7.29109	5.17147	Tumor	BRCA
TCGA-A1-A0SJ-01A	416	0	0.363309	2.99201	5.29775	7.75352	6.15338	Tumor	BRCA
TCGA-AC-A62X-01A	417	0	0.473784	5.20036	6.42243	7.5688	6.72796	Tumor	BRCA
TCGA-A7-A4SB-01A	418	0	0.126299	2.68812	3.80732	7.41972	5.61016	Tumor	BRCA
TCGA-S3-AA11-01A	421	0	0.555363	2.5252	3.20781	6.52758	6.01227	Tumor	BRCA
TCGA-BH-A0DK-01A	423	0	2.55151	4.27252	4.37854	6.99444	5.08926	Tumor	BRCA
TCGA-S3-AA17-01A	424	0	3.84265	5.00176	2.6021	6.36004	6.10963	Tumor	BRCA
TCGA-EW-A1PD-01A	424	0	0.330788	2.84341	5.73886	7.38157	5.89821	Tumor	BRCA
TCGA-D8-A142-01A	425	0	1.35458	2.28793	3.45588	7.59047	5.42227	Tumor	BRCA
TCGA-D8-A1JH-01A	426	0	1.94042	2.86958	2.7822	7.52135	5.44973	Tumor	BRCA
TCGA-A8-A07I-01A	426	0	2.66535	4.47255	3.54032	7.19115	5.49366	Tumor	BRCA
TCGA-A8-A09X-01A	426	1	3.20515	4.75483	2.41276	8.01346	4.89552	Tumor	BRCA
TCGA-E2-A15S-01A	428	0	0.122116	2.72326	3.87087	7.24097	5.99611	Tumor	BRCA
TCGA-OL-A66P-01A	428	0	1.96443	5.01972	3.38372	5.93347	5.53306	Tumor	BRCA
TCGA-D8-A1Y3-01A	430	0	1.9472	3.54725	1.61239	7.39625	5.75666	Tumor	BRCA
TCGA-D8-A143-01A	431	0	1.72264	2.89054	8.76336	6.52117	6.3255	Tumor	BRCA
TCGA-D8-A1J8-01A	431	0	3.55239	2.53909	5.08675	7.9939	4.82758	Tumor	BRCA
TCGA-D8-A1Y2-01A	433	0	1.60654	2.83746	2.94254	7.3545	5.32797	Tumor	BRCA
TCGA-A1-A0SG-01A	434	0	0.570497	2.57169	4.04927	7.55631	5.56777	Tumor	BRCA
TCGA-BH-A0E2-01A	435	0	1.36778	4.55084	3.76915	7.92679	6.01591	Tumor	BRCA
TCGA-A1-A0SD-01A	437	0	1.5269	3.89345	4.56792	7.6708	6.4221	Tumor	BRCA
TCGA-D8-A27I-01A	439	0	1.78812	2.82197	4.99148	7.36904	5.70216	Tumor	BRCA
TCGA-C8-A27B-01A	439	0	2.98972	3.18242	2.70772	8.06046	5.42488	Tumor	BRCA
TCGA-EW-A1PF-01A	439	0	1.61768	3.49404	3.94507	7.42324	6.19429	Tumor	BRCA
TCGA-LL-A5YO-01A	440	0	4.1697	5.10836	1.88972	6.71414	4.95198	Tumor	BRCA
TCGA-LL-A740-01A	441	0	1.47253	3.99943	6.76587	7.78991	6.50761	Tumor	BRCA
TCGA-D8-A1XK-01A	441	0	2.20935	3.6482	5.48714	8.92678	6.65527	Tumor	BRCA
TCGA-A7-A4SD-01A	441	0	3.12904	4.2813	3.7775	7.06728	7.24964	Tumor	BRCA
TCGA-A7-A4SC-01A	446	0	0.984231	4.08773	5.32963	7.19519	6.66536	Tumor	BRCA
TCGA-AC-A2QJ-01A	446	1	0.423737	3.3067	6.18503	5.43295	6.51428	Tumor	BRCA
TCGA-A7-A425-01A	447	0	0.262046	2.91815	8.04626	7.10547	6.12878	Tumor	BRCA
TCGA-LL-A5YN-01A	447	0	3.36666	4.70964	2.9012	5.85365	5.90522	Tumor	BRCA
TCGA-D8-A1JU-01A	447	0	1.13867	2.155	5.23195	7.46204	5.71297	Tumor	BRCA
TCGA-A7-A56D-01A	448	0	1.03721	5.22193	5.11127	5.60502	4.90328	Tumor	BRCA
TCGA-D8-A1XG-01A	448	0	0.184477	2.63772	1.64261	7.46404	5.6132	Tumor	BRCA
TCGA-E2-A158-01A	450	0	0.844172	3.5289	4.16747	7.28419	6.34286	Tumor	BRCA
TCGA-LL-A5YP-01A	450	0	1.73938	3.64264	5.46053	7.48996	6.61701	Tumor	BRCA
TCGA-AC-A3OD-01B	451	0	2.50494	2.74385	1.54433	5.00908	3.84272	Tumor	BRCA
TCGA-A7-A4SA-01A	454	0	2.75277	4.34929	4.85116	6.36443	5.59144	Tumor	BRCA
TCGA-AC-A5XU-01A	455	0	0.614373	2.91384	3.27681	7.25788	5.64529	Tumor	BRCA
TCGA-AC-A3TN-01A	456	0	0.348619	3.64657	3.84167	6.64544	5.82162	Tumor	BRCA
TCGA-A8-A09V-01A	457	0	0.168677	1.97568	1.0408	7.13602	5.79986	Tumor	BRCA
TCGA-A8-A084-01A	458	0	1.02986	3.59761	3.64266	7.08131	5.29261	Tumor	BRCA
TCGA-BH-A0H0-01A	461	0	1.14626	1.54433	2.95726	7.1774	5.7853	Tumor	BRCA
TCGA-D8-A1XV-01A	461	0	0.135389	1.61213	0.323821	6.86101	4.47412	Tumor	BRCA
TCGA-EW-A6S9-01A	463	0	1.26588	3.43484	3.56249	7.24105	6.34917	Tumor	BRCA
TCGA-D8-A1XF-01A	463	0	0.802524	2.79412	2.06881	7.64848	5.8627	Tumor	BRCA
TCGA-D8-A1XZ-01A	466	0	1.99072	2.27466	1.47723	8.15955	5.67106	Tumor	BRCA
TCGA-XX-A899-01A	467	0	2.06517	3.43719	6.2284	7.4524	6.04767	Tumor	BRCA
TCGA-BH-A18N-01A	468	1	0.2871	3.05062	2.02732	7.17759	6.06227	Tumor	BRCA
TCGA-C8-A26Z-01A	470	0	0.426369	1.79795	0.810001	8.04815	6.03611	Tumor	BRCA
TCGA-AC-A3W7-01A	471	0	0.685563	3.07429	4.68609	7.11495	5.93067	Tumor	BRCA
TCGA-D8-A1Y0-01A	472	0	2.96828	2.27366	1.077	7.16193	6.18168	Tumor	BRCA
TCGA-AQ-A1H2-01A	475	0	0.588918	3.64343	5.70299	7.20546	5.90892	Tumor	BRCA
TCGA-BH-A0DP-01A	476	0	0.97057	2.30729	4.22093	7.44266	5.49507	Tumor	BRCA
TCGA-BH-A0E1-01A	477	0	0.289204	4.00233	4.12757	7.33627	6.07015	Tumor	BRCA
TCGA-EW-A1J5-01A	477	0	4.14019	4.63056	3.19818	6.90435	5.40811	Tumor	BRCA
TCGA-LL-A73Y-01A	477	0	2.68543	3.48714	4.60448	7.33202	6.31154	Tumor	BRCA
TCGA-D8-A1JC-01A	480	0	2.6355	3.1498	1.72771	7.4604	5.7505	Tumor	BRCA
TCGA-D8-A1XR-01A	482	0	0.266208	3.23943	4.00725	7.57848	5.80369	Tumor	BRCA
TCGA-XX-A89A-01A	488	0	1.69993	2.78892	7.00118	7.25571	6.46644	Tumor	BRCA
TCGA-D8-A27F-01A	488	0	0.351934	2.05748	6.59404	8.02777	5.58383	Tumor	BRCA
TCGA-LL-A6FR-01A	489	0	0.0371621	5.33382	5.33935	6.81423	5.46027	Tumor	BRCA
TCGA-D8-A73U-01A	492	0	3.19656	3.84843	3.76682	6.46395	5.43374	Tumor	BRCA
TCGA-BH-A0DZ-01A	495	0	1.11517	4.11869	4.24759	7.00501	5.83722	Tumor	BRCA
TCGA-D8-A1XS-01A	496	0	1.87574	1.61468	1.87739	7.42961	5.88802	Tumor	BRCA
TCGA-AC-A3HN-01A	496	0	1.54875	2.90262	5.66258	7.34886	5.79773	Tumor	BRCA
TCGA-D8-A1XQ-01A	499	0	2.6231	3.33231	6.12484	6.72904	5.84447	Tumor	BRCA
TCGA-D8-A27L-01A	499	0	2.45287	3.05663	2.61761	7.09189	5.62424	Tumor	BRCA
TCGA-A2-A1G6-01A	501	0	1.10701	2.05905	4.76261	8.28284	5.47573	Tumor	BRCA
TCGA-E2-A1BC-01A	501	0	0.773168	2.06141	5.52677	7.95877	5.37497	Tumor	BRCA
TCGA-D8-A1JA-01A	502	0	1.48116	2.55094	5.705	7.62147	5.61937	Tumor	BRCA
TCGA-D8-A1XY-01A	503	0	1.4009	2.85324	4.45081	8.02344	5.0807	Tumor	BRCA
TCGA-AC-A3W5-01A	504	0	2.62456	3.55784	5.36679	6.9132	6.18817	Tumor	BRCA
TCGA-EW-A1J3-01A	504	0	1.12885	2.93697	2.10743	6.81351	5.05299	Tumor	BRCA
TCGA-D8-A1XT-01A	506	0	2.13166	3.91975	4.19856	7.46234	6.10199	Tumor	BRCA
TCGA-C8-A274-01A	508	0	0.718167	2.24565	0.53291	6.67175	5.30946	Tumor	BRCA
TCGA-D8-A1X7-01A	509	0	0.60917	3.01908	3.09007	7.66644	5.37454	Tumor	BRCA
TCGA-EW-A6SA-01A	510	0	0.188367	3.04699	1.80086	6.83299	7.3606	Tumor	BRCA
TCGA-AC-A5EH-01A	511	0	1.58738	4.35315	4.49612	7.37201	6.64054	Tumor	BRCA
TCGA-C8-A273-01A	513	0	1.05783	2.58967	2.87591	7.5949	6.35735	Tumor	BRCA
TCGA-BH-A0HN-01A	516	0	0.0351723	2.75568	2.11773	6.62095	5.11291	Tumor	BRCA
TCGA-A8-A075-01A	518	0	2.11676	3.07801	4.69823	7.38893	4.98348	Tumor	BRCA
TCGA-UL-AAZ6-01A	518	0	0.385665	3.98751	3.46618	6.3697	5.73928	Tumor	BRCA
TCGA-A8-A0AB-01A	518	0	0.0526791	1.68901	3.46035	6.89053	5.70693	Tumor	BRCA
TCGA-LL-A5YL-01A	519	0	0.788612	4.45265	3.38391	6.8285	5.78142	Tumor	BRCA
TCGA-D8-A27N-01A	519	0	0.835967	4.17185	4.81553	7.45084	5.65268	Tumor	BRCA
TCGA-A2-A0T1-01A	521	0	2.90013	4.3866	3.07713	6.9574	4.98141	Tumor	BRCA
TCGA-D8-A1XD-01A	522	0	0.428737	1.63845	3.0662	7.25019	5.32557	Tumor	BRCA
TCGA-A2-A25C-01A	523	0	1.67402	4.25444	2.61671	7.41729	4.68443	Tumor	BRCA
TCGA-AR-A1AR-01A	524	1	2.75474	1.94627	6.52977	7.84975	5.32884	Tumor	BRCA
TCGA-S3-AA15-01A	525	0	1.5371	4.86079	6.23282	6.54294	5.38201	Tumor	BRCA
TCGA-E2-A15D-01A	526	0	1.32847	2.81384	5.23136	7.59355	5.80536	Tumor	BRCA
TCGA-OL-A66O-01A	528	0	0.558534	3.50136	2.20499	6.27052	5.85794	Tumor	BRCA
TCGA-A2-A1FW-01A	528	0	0.842241	1.95212	2.41987	7.64465	6.33224	Tumor	BRCA
TCGA-S3-AA14-01A	529	0	0.595749	2.76727	3.56835	6.96064	5.56406	Tumor	BRCA
TCGA-D8-A27E-01A	530	0	1.17489	3.40173	1.67128	7.45598	5.48384	Tumor	BRCA
TCGA-AC-A62Y-01A	530	0	1.39428	3.34837	5.8518	7.45841	5.09545	Tumor	BRCA
TCGA-A2-A0T5-01A	531	0	0.306753	3.19699	3.24679	7.13404	5.58902	Tumor	BRCA
TCGA-LL-A9Q3-01A	532	0	1.18837	5.04137	4.96235	7.60635	5.89715	Tumor	BRCA
TCGA-EW-A3U0-01A	532	0	3.65258	4.31581	5.73203	6.60985	5.25215	Tumor	BRCA
TCGA-D8-A1J9-01A	532	0	1.88963	4.04667	1.77653	7.22868	5.73504	Tumor	BRCA
TCGA-EW-A423-01A	533	0	0.652053	2.98108	1.73854	6.88323	6.18191	Tumor	BRCA
TCGA-A2-A0T0-01A	533	0	1.11146	3.55848	8.24035	7.64655	5.4199	Tumor	BRCA
TCGA-D8-A1XM-01A	538	0	2.33983	3.23787	5.00984	7.73141	4.95955	Tumor	BRCA
TCGA-BH-A1EY-01A	538	1	2.98339	2.73448	3.83702	7.70068	5.83627	Tumor	BRCA
TCGA-D8-A1X6-01A	541	0	1.06385	3.35132	1.77954	7.60317	5.80699	Tumor	BRCA
TCGA-AO-A1KT-01A	541	0	1.04173	3.05787	4.6172	7.70587	6.19112	Tumor	BRCA
TCGA-A7-A4SF-01A	545	0	1.26149	2.54139	1.41271	7.01615	5.97488	Tumor	BRCA
TCGA-A8-A093-01A	546	0	0.230118	1.97361	3.9403	7.41596	5.7543	Tumor	BRCA
TCGA-A8-A06R-01A	547	0	2.17912	3.4625	4.2441	6.59121	5.45141	Tumor	BRCA
TCGA-A2-A04P-01A	548	1	1.96556	3.54798	3.59253	6.14548	6.04512	Tumor	BRCA
TCGA-A8-A082-01A	549	0	0.172158	2.32383	2.5314	7.80094	5.86038	Tumor	BRCA
TCGA-GM-A5PX-01A	551	0	0.662023	2.92559	4.70059	7.75548	5.4259	Tumor	BRCA
TCGA-D8-A1JD-01A	552	0	2.75511	2.75645	3.28424	6.99336	5.76933	Tumor	BRCA
TCGA-D8-A1XB-01A	552	0	1.17794	2.46556	2.74425	7.16208	5.96516	Tumor	BRCA
TCGA-BH-A0BD-01A	554	0	2.05619	3.59543	4.62727	7.02327	5.46048	Tumor	BRCA
TCGA-E2-A15G-01A	554	0	0.170576	2.33527	2.91079	7.18314	6.15834	Tumor	BRCA
TCGA-A2-A0YE-01A	554	0	1.10689	3.27277	5.05316	7.09496	7.12543	Tumor	BRCA
TCGA-EW-A1IZ-01A	554	0	3.4987	4.73333	2.03923	7.16211	5.27588	Tumor	BRCA
TCGA-A1-A0SQ-01A	554	0	0.301911	2.33309	2.41042	7.12002	5.98892	Tumor	BRCA
TCGA-B6-A0WW-01A	558	1	0.861481	1.67296	1.49244	7.58828	5.88727	Tumor	BRCA
TCGA-EW-A1P6-01A	562	0	0.386827	1.74068	1.01142	7.30286	6.00141	Tumor	BRCA
TCGA-S3-A6ZG-01A	562	0	1.25558	2.44142	2.83715	6.60466	5.71334	Tumor	BRCA
TCGA-D8-A3Z6-01A	563	0	0.982851	3.11572	3.01789	7.17629	6.02196	Tumor	BRCA
TCGA-E2-A14Z-01A	563	1	2.9638	2.92925	4.72714	7.43985	5.37731	Tumor	BRCA
TCGA-D8-A1X5-01A	565	0	1.37732	2.96714	2.6378	6.7751	5.29153	Tumor	BRCA
TCGA-A2-A0YJ-01A	566	0	0.145477	2.82741	7.80309	8.18256	6.29945	Tumor	BRCA
TCGA-BH-A5IZ-01A	567	0	0.235972	5.22055	2.52639	7.60985	7.37827	Tumor	BRCA
TCGA-AC-A6IV-01A	568	0	2.16149	3.14414	6.41441	7.1082	5.52669	Tumor	BRCA
TCGA-B6-A0IK-01A	571	1	1.72504	2.6018	3.57398	7.92491	5.81767	Tumor	BRCA
TCGA-S3-A6ZF-01A	572	0	1.98869	2.86869	4.77176	7.52246	5.90665	Tumor	BRCA
TCGA-B6-A409-01A	573	1	0.975522	2.73877	4.38816	7.57895	5.77148	Tumor	BRCA
TCGA-BH-A8FZ-01A	574	0	2.82891	3.97424	6.16819	7.59859	5.68074	Tumor	BRCA
TCGA-S3-AA12-01A	574	0	0.57028	2.99181	1.38893	6.82952	4.84991	Tumor	BRCA
TCGA-D8-A1JE-01A	575	0	0.88028	2.23046	0.406861	7.52437	4.80653	Tumor	BRCA
TCGA-EW-A1PA-01A	575	0	1.26689	3.03141	2.50154	7.70115	5.97174	Tumor	BRCA
TCGA-EW-A1J1-01A	575	0	2.00007	2.73618	1.16904	7.60737	5.77387	Tumor	BRCA
TCGA-A2-A0T6-01A	575	0	2.49017	1.8389	5.08595	7.71514	5.3705	Tumor	BRCA
TCGA-E9-A1NH-01A	576	0	0.90147	3.09166	3.38757	7.28046	5.55947	Tumor	BRCA
TCGA-BH-A1FG-01A	577	1	0.500202	2.19309	1.38014	7.67563	5.4652	Tumor	BRCA
TCGA-A8-A07G-01A	577	0	1.12779	2.3906	5.32155	7.33855	5.45823	Tumor	BRCA
TCGA-A8-A07F-01A	577	0	1.6021	2.46133	2.88111	7.50349	5.83254	Tumor	BRCA
TCGA-D8-A1JI-01A	577	0	0.408755	2.64061	5.49029	7.70678	6.16346	Tumor	BRCA
TCGA-A8-A0A2-01A	579	0	1.28544	2.78591	1.22406	7.73941	5.49261	Tumor	BRCA
TCGA-A8-A09T-01A	579	0	0	2.64829	2.32898	7.73731	5.70146	Tumor	BRCA
TCGA-AQ-A7U7-01A	584	1	4.19971	4.94639	1.01952	6.83061	5.51578	Tumor	BRCA
TCGA-A2-A1G1-01A	584	0	3.37236	3.00412	2.62799	7.75201	7.39628	Tumor	BRCA
TCGA-D8-A147-01A	584	0	3.38599	3.37102	2.283	7.53809	6.38937	Tumor	BRCA
TCGA-A1-A0SP-01A	584	0	2.08195	2.75446	3.10575	6.63587	7.56157	Tumor	BRCA
TCGA-AC-A23C-01A	585	0	2.28839	2.65904	3.43863	7.21318	5.42481	Tumor	BRCA
TCGA-S3-AA10-01A	586	0	4.04116	4.42984	3.83999	6.81004	6.79964	Tumor	BRCA
TCGA-A2-A0YK-01A	588	0	3.45425	3.80672	4.43039	7.36189	5.60843	Tumor	BRCA
TCGA-AC-A2QI-01A	588	0	1.68253	2.48613	3.74972	6.87038	5.75526	Tumor	BRCA
TCGA-AC-A5XS-01A	588	0	1.87596	3.73189	7.06301	6.99879	5.04633	Tumor	BRCA
TCGA-D8-A1JM-01A	590	0	1.91695	5.01385	7.09027	7.66136	8.24431	Tumor	BRCA
TCGA-E2-A154-01A	591	0	0.136519	1.60603	1.98604	7.39081	6.17842	Tumor	BRCA
TCGA-LL-A7SZ-01A	594	0	2.32313	5.67041	3.5276	5.81278	5.07367	Tumor	BRCA
TCGA-A2-A1G4-01A	595	0	0.939112	2.90791	2.12074	7.60522	5.74078	Tumor	BRCA
TCGA-E2-A15P-01A	595	0	0.866099	2.79145	3.27717	7.44808	5.26311	Tumor	BRCA
TCGA-LL-A8F5-01A	596	0	1.92319	4.63987	8.94492	6.37042	5.58395	Tumor	BRCA
TCGA-E2-A1L9-01A	598	0	1.56525	2.54793	3.68905	7.62984	5.38635	Tumor	BRCA
TCGA-OL-A6VQ-01A	600	0	1.31642	3.33659	4.59362	7.60824	5.92779	Tumor	BRCA
TCGA-D8-A1XL-01A	606	0	3.26665	4.73406	2.9725	6.9807	5.02489	Tumor	BRCA
TCGA-EW-A1PH-01A	607	0	2.11208	3.40016	2.88582	7.81946	5.24586	Tumor	BRCA
TCGA-A8-A08G-01A	607	0	2.30963	3.7959	1.60349	7.53075	6.62791	Tumor	BRCA
TCGA-A8-A07E-01A	608	0	1.64218	2.32067	4.85005	7.42968	5.78059	Tumor	BRCA
TCGA-EW-A1PB-01A	608	0	3.03829	5.03361	2.11813	7.53092	7.41115	Tumor	BRCA
TCGA-D8-A1JL-01A	611	0	4.42256	4.34071	3.21085	7.67639	7.41043	Tumor	BRCA
TCGA-D8-A1JJ-01A	611	0	1.0864	3.34654	3.8619	7.43775	5.79844	Tumor	BRCA
TCGA-BH-A18J-01A	612	1	0.617198	2.82189	5.06309	7.04458	6.0979	Tumor	BRCA
TCGA-E9-A243-01A	612	0	3.63301	4.01012	0.638761	7.05509	5.6555	Tumor	BRCA
TCGA-BH-A2L8-01A	612	0	2.74178	3.69151	5.20336	6.67927	5.56197	Tumor	BRCA
TCGA-AC-A8OP-01A	614	0	1.49981	2.67011	4.4659	6.97577	6.45926	Tumor	BRCA
TCGA-A7-A13E-01A	614	1	0.628505	3.36186	4.07854	6.72319	5.94411	Tumor	BRCA
TCGA-A2-A1G0-01A	616	0	1.40256	2.48891	2.94542	8.13752	5.83224	Tumor	BRCA
TCGA-AR-A2LH-01A	616	1	2.12797	4.81358	6.15698	7.36809	5.61684	Tumor	BRCA
TCGA-C8-A26V-01A	616	0	1.39613	3.20114	4.22988	7.28319	6.14734	Tumor	BRCA
TCGA-AO-A0J7-01A	618	0	0.470207	1.29475	3.71795	6.58393	6.12774	Tumor	BRCA
TCGA-BH-A0HI-01A	620	0	0.897044	2.62857	3.53496	7.41406	5.66134	Tumor	BRCA
TCGA-D8-A1JN-01A	620	0	1.29203	2.09936	2.21243	7.04079	5.29183	Tumor	BRCA
TCGA-OL-A5S0-01A	620	0	2.37786	4.12492	5.38927	7.29631	6.1541	Tumor	BRCA
TCGA-AO-A1KO-01A	622	0	0.440855	2.48979	4.84897	7.17476	4.61336	Tumor	BRCA
TCGA-BH-A0AW-01A	622	0	3.32971	3.18095	2.49565	7.00903	5.42274	Tumor	BRCA
TCGA-A2-A0T4-01A	624	0	1.65955	3.41247	4.58366	7.42409	5.78798	Tumor	BRCA
TCGA-E2-A15L-01A	626	0	0.274504	3.65564	4.17578	7.49028	6.12295	Tumor	BRCA
TCGA-D8-A141-01A	626	0	3.56145	3.02301	2.89773	7.12793	5.36548	Tumor	BRCA
TCGA-A7-A26J-01A	627	0	1.9052	2.30812	1.96522	7.31008	5.8342	Tumor	BRCA
TCGA-S3-AA0Z-01A	629	0	2.02116	4.65352	3.7312	5.83707	5.42643	Tumor	BRCA
TCGA-E2-A15E-06A	630	0	1.51575	2.22844	1.071	7.54215	5.16803	Tumor	BRCA
TCGA-E2-A15E-01A	630	0	0.254784	1.86264	4.27458	7.41082	5.69427	Tumor	BRCA
TCGA-A2-A0T7-01A	631	0	1.20166	2.00737	3.82162	7.64002	5.72429	Tumor	BRCA
TCGA-A1-A0SI-01A	635	0	2.54081	3.31891	3.24183	7.17183	5.51213	Tumor	BRCA
TCGA-BH-A42V-01A	635	0	1.38979	3.34434	5.13937	7.35059	5.84761	Tumor	BRCA
TCGA-D8-A13Z-01A	635	0	2.52897	4.00709	5.22246	6.76732	6.61591	Tumor	BRCA
TCGA-D8-A1JP-01A	639	0	1.76017	3.19252	0.757883	7.563	5.47606	Tumor	BRCA
TCGA-B6-A0WX-01A	639	1	1.51599	2.37965	2.61931	7.32163	6.12471	Tumor	BRCA
TCGA-A8-A0A6-01A	640	0	3.07966	4.16254	1.98205	7.4782	5.17234	Tumor	BRCA
TCGA-E2-A155-01A	640	0	0.753848	2.85104	2.1522	7.71729	4.92885	Tumor	BRCA
TCGA-S3-A6ZH-01A	641	0	1.03198	3.68768	2.7296	7.82324	5.69982	Tumor	BRCA
TCGA-A2-A4S2-01A	643	0	2.52494	5.13713	6.83052	6.82403	5.8053	Tumor	BRCA
TCGA-D8-A146-01A	643	0	1.37628	3.26799	5.11051	7.49482	5.77981	Tumor	BRCA
TCGA-A7-A4SE-01A	644	0	1.90093	3.52695	5.93126	7.42808	6.49723	Tumor	BRCA
TCGA-LD-A66U-01A	646	0	2.07086	3.8264	4.14031	6.4723	6.19195	Tumor	BRCA
TCGA-E9-A1RG-01A	647	0	1.08763	1.87811	5.75879	6.7161	5.98182	Tumor	BRCA
TCGA-A2-A4RY-01A	648	0	1.23653	3.3067	6.00259	7.20641	6.28814	Tumor	BRCA
TCGA-AO-A0J3-01A	651	0	0.215387	2.51208	1.21134	7.62607	6.64695	Tumor	BRCA
TCGA-BH-A18H-01A	652	0	2.91993	4.26763	4.14003	7.32859	5.28614	Tumor	BRCA
TCGA-AO-A0JA-01A	655	0	1.42949	2.47903	2.61877	7.0955	5.81615	Tumor	BRCA
TCGA-E2-A15F-01A	658	0	1.08873	3.53574	3.92259	7.57711	6.00222	Tumor	BRCA
TCGA-A2-A0YH-01A	659	0	3.7312	4.0713	2.60597	6.89979	5.82033	Tumor	BRCA
TCGA-D8-A4Z1-01A	659	0	1.45385	2.50749	4.34067	7.58946	5.76087	Tumor	BRCA
TCGA-BH-A0BJ-01A	660	0	0.541774	1.74891	4.30474	7.52195	5.82213	Tumor	BRCA
TCGA-A7-A26I-01B	661	0	1.79367	2.25804	2.42804	6.50291	4.16972	Tumor	BRCA
TCGA-BH-A8G0-01A	662	0	1.52764	3.06084	4.06213	7.10506	5.86186	Tumor	BRCA
TCGA-D8-A1XJ-01A	664	0	0.928783	2.76369	4.2946	7.33487	5.43505	Tumor	BRCA
TCGA-A2-A4S3-01A	666	0	2.48934	2.5559	2.85488	7.3536	6.24457	Tumor	BRCA
TCGA-A2-A0YG-01A	666	0	1.12131	3.12068	3.04874	7.55509	5.65787	Tumor	BRCA
TCGA-EW-A2FW-01A	672	0	0.532446	3.38808	2.84479	7.43791	6.08933	Tumor	BRCA
TCGA-E2-A1IN-01A	675	0	0.671215	1.54904	0.677119	7.47946	5.68481	Tumor	BRCA
TCGA-AC-A3QP-01A	675	0	0.396775	3.49417	4.22658	7.05503	5.96479	Tumor	BRCA
TCGA-AC-A2B8-01A	677	0	1.75825	2.22848	5.4182	7.44995	5.75099	Tumor	BRCA
TCGA-E9-A1N6-01A	678	1	1.35656	3.10742	3.59941	7.11171	6.01335	Tumor	BRCA
TCGA-A7-A2KD-01A	679	0	2.43445	3.24657	1.61432	7.37258	5.00053	Tumor	BRCA
TCGA-OL-A5RZ-01A	679	0	0.56343	2.15144	5.34958	6.58661	5.60349	Tumor	BRCA
TCGA-AO-A0J8-01A	680	0	1.71082	2.44255	3.44167	7.32447	5.96394	Tumor	BRCA
TCGA-MS-A51U-01A	681	0	1.70692	2.59602	4.74294	7.28193	5.62024	Tumor	BRCA
TCGA-A2-A1FZ-01A	683	0	1.05621	3.2096	6.55488	7.22357	6.01289	Tumor	BRCA
TCGA-E2-A15C-01A	694	0	1.09682	2.11389	2.53588	7.34538	5.77315	Tumor	BRCA
TCGA-EW-A1OW-01A	694	0	1.79795	3.35323	6.83275	7.71271	6.58415	Tumor	BRCA
TCGA-AC-A23E-01A	698	0	0.411949	2.48597	4.8429	7.72158	5.41562	Tumor	BRCA
TCGA-BH-A0WA-01A	701	0	1.66457	3.20484	5.61098	7.57753	5.54353	Tumor	BRCA
TCGA-BH-A0H7-01A	702	0	0.920405	1.66926	2.21221	7.3786	5.54379	Tumor	BRCA
TCGA-EW-A1P5-01A	703	0	2.19098	4.56194	1.53615	7.58467	5.75658	Tumor	BRCA
TCGA-A2-A4S0-01A	706	0	0.235587	3.6136	2.33496	7.15826	5.92774	Tumor	BRCA
TCGA-AC-A3YI-01A	707	0	0.856092	3.34798	6.49396	7.60529	5.99055	Tumor	BRCA
TCGA-E2-A153-01A	707	0	0.0893421	2.31664	6.51805	7.54878	5.78705	Tumor	BRCA
TCGA-AR-A0TU-01A	709	0	2.52519	2.61323	4.83949	7.44219	6.71217	Tumor	BRCA
TCGA-E2-A15A-06A	710	0	3.25016	2.82174	2.17994	7.4737	6.07706	Tumor	BRCA
TCGA-E2-A15A-01A	710	0	1.75268	2.80349	3.25643	7.539	6.30033	Tumor	BRCA
TCGA-OL-A66I-01A	714	0	3.96831	4.85823	5.11385	7.22894	6.39353	Tumor	BRCA
TCGA-A2-A1FV-01A	714	0	0.0669288	0.465667	2.42458	7.80148	4.16614	Tumor	BRCA
TCGA-BH-A5J0-01A	715	0	1.92497	3.42427	4.75458	6.72212	6.18066	Tumor	BRCA
TCGA-EW-A424-01A	715	0	0.126348	3.22314	2.29323	7.18403	6.07495	Tumor	BRCA
TCGA-A7-A13G-01B	718	0	0.481776	2.71842	2.6441	6.57581	4.18327	Tumor	BRCA
TCGA-A7-A26G-01A	722	0	2.44846	1.69107	5.6017	7.21879	5.63477	Tumor	BRCA
TCGA-A2-A0YT-01A	723	1	0.726176	2.93077	4.35778	7.61624	5.75239	Tumor	BRCA
TCGA-A7-A26H-01A	724	0	1.61554	1.97955	3.64375	7.84011	5.51525	Tumor	BRCA
TCGA-E9-A54Y-01A	725	0	0.433418	1.72591	4.99136	5.09631	5.77064	Tumor	BRCA
TCGA-E2-A156-01A	726	0	0	3.75034	4.07604	7.53869	5.48681	Tumor	BRCA
TCGA-E9-A54X-01A	727	0	0	3.07314	7.24644	7.90356	5.67371	Tumor	BRCA
TCGA-BH-A0HF-01A	727	0	1.08625	2.39872	4.98455	7.30867	5.89925	Tumor	BRCA
TCGA-D8-A1X9-01A	727	0	2.53989	4.16755	2.61629	7.62626	5.13947	Tumor	BRCA
TCGA-BH-A0W3-01A	728	0	0.80114	2.60717	3.1619	7.42987	5.92325	Tumor	BRCA
TCGA-AC-A3QQ-01B	734	0	0.215831	2.97271	1.13999	4.88287	3.38975	Tumor	BRCA
TCGA-A7-A26F-01B	738	0	2.56281	3.09093	3.99401	6.21585	4.96327	Tumor	BRCA
TCGA-A2-A4RX-01A	742	0	2.01814	3.44973	7.6812	7.14676	5.29521	Tumor	BRCA
TCGA-BH-A0EB-01A	745	0	1.80481	2.93582	1.82903	7.26084	5.78434	Tumor	BRCA
TCGA-E9-A24A-01A	747	0	1.67172	3.09591	2.42792	7.12307	5.479	Tumor	BRCA
TCGA-BH-A0H6-01A	747	0	0.364547	2.97159	3.92372	7.6165	5.80033	Tumor	BRCA
TCGA-C8-A27A-01A	747	0	1.54376	3.70745	1.99956	7.6767	5.40512	Tumor	BRCA
TCGA-E2-A1LA-01A	748	0	2.20365	4.1294	1.92186	7.06675	5.92566	Tumor	BRCA
TCGA-B6-A0I8-01A	749	1	0.0766866	1.38663	4.17982	7.60469	6.97763	Tumor	BRCA
TCGA-A2-A0EX-01A	752	0	0.701185	2.30942	0.848261	6.87258	5.33822	Tumor	BRCA
TCGA-OL-A5RY-01A	752	0	2.70107	4.8478	6.44623	7.08216	5.56972	Tumor	BRCA
TCGA-AC-A3YJ-01A	754	0	0.580131	4.0076	2.62239	6.72145	5.47843	Tumor	BRCA
TCGA-AQ-A04H-01B	754	0	1.42291	2.52289	3.24475	7.36364	5.98893	Tumor	BRCA
TCGA-A2-A0CM-01A	754	1	3.65667	4.28099	2.60599	6.96375	6.17922	Tumor	BRCA
TCGA-E9-A1QZ-01A	755	0	2.64261	3.39762	5.73486	8.07716	5.20217	Tumor	BRCA
TCGA-BH-A0W4-01A	759	0	0.275112	2.97287	5.88291	7.32473	6.22943	Tumor	BRCA
TCGA-LL-A440-01A	759	0	1.60209	2.6776	7.19885	7.082	6.4175	Tumor	BRCA
TCGA-EW-A6SB-01A	760	0	2.86152	4.52601	1.1353	6.22315	6.69598	Tumor	BRCA
TCGA-A8-A07U-01A	760	0	4.12827	4.80737	3.86963	6.75818	6.67213	Tumor	BRCA
TCGA-A8-A09Q-01A	761	0	2.4352	1.89227	2.62431	7.18996	5.05424	Tumor	BRCA
TCGA-LL-A50Y-01A	762	0	0.647093	3.73472	2.96395	6.88766	5.65687	Tumor	BRCA
TCGA-AC-A3TM-01A	762	0	0.893602	4.02404	4.68653	5.85025	5.55352	Tumor	BRCA
TCGA-E2-A159-01A	762	0	3.38653	4.02552	2.9433	7.4387	4.94515	Tumor	BRCA
TCGA-A7-A13F-01A	765	0	0.0342752	3.98844	2.25287	7.25291	5.9556	Tumor	BRCA
TCGA-D8-A73X-01A	767	0	0.959814	2.31696	1.49454	7.00441	5.73128	Tumor	BRCA
TCGA-A2-A0D4-01A	767	0	0.0612303	2.31217	4.36278	6.97529	5.14428	Tumor	BRCA
TCGA-A2-A0YD-01A	769	0	1.71559	3.08809	5.51558	7.54442	6.06327	Tumor	BRCA
TCGA-BH-A0AY-01A	777	0	0.819804	2.19107	4.55743	7.2735	5.33678	Tumor	BRCA
TCGA-D8-A1X8-01A	783	0	1.09363	2.79999	3.21206	7.6446	5.60752	Tumor	BRCA
TCGA-BH-A1F0-01A	785	1	3.82902	4.62371	4.15674	7.73585	5.35057	Tumor	BRCA
TCGA-E9-A5UO-01A	785	0	0	3.81845	2.06094	7.41759	5.633	Tumor	BRCA
TCGA-E9-A1NG-01A	786	1	0.867889	2.89301	3.71599	8.064	6.02641	Tumor	BRCA
TCGA-EW-A2FV-01A	788	0	2.19196	4.7511	3.70328	7.30248	5.59115	Tumor	BRCA
TCGA-EW-A1OV-01A	789	0	3.30603	3.51092	2.23562	6.36498	5.47672	Tumor	BRCA
TCGA-A8-A06Y-01A	791	0	0.416274	2.02591	4.95974	7.20195	5.51022	Tumor	BRCA
TCGA-AC-A2FM-01A	792	1	0.428185	3.00462	4.01754	7.51611	6.02787	Tumor	BRCA
TCGA-OL-A66N-01A	792	0	0.401644	4.59704	2.40882	7.29423	5.98848	Tumor	BRCA
TCGA-AO-A0J5-01A	792	1	0.412611	2.70237	3.3415	7.641	6.60165	Tumor	BRCA
TCGA-BH-A202-01A	795	0	2.30255	2.59097	3.78351	7.39808	5.16455	Tumor	BRCA
TCGA-AO-A0JG-01A	798	0	2.40319	2.97939	2.2516	7.85001	6.04683	Tumor	BRCA
TCGA-E9-A5UP-01A	803	0	0.408735	3.54813	6.42405	6.77982	6.23212	Tumor	BRCA
TCGA-BH-A0HB-01A	806	0	1.65567	3.02481	3.04309	7.21785	4.87005	Tumor	BRCA
TCGA-BH-A18L-01A	811	1	0.540705	2.50947	2.70011	7.2414	6.20628	Tumor	BRCA
TCGA-E9-A5FK-01A	812	0	3.08768	5.17586	5.50118	6.71331	5.03018	Tumor	BRCA
TCGA-OL-A66H-01A	812	0	1.33636	5.45218	3.93314	7.77786	6.04966	Tumor	BRCA
TCGA-AQ-A04J-01A	819	0	2.30359	4.11034	4.11666	7.02486	5.3086	Tumor	BRCA
TCGA-A2-A4S1-01A	820	0	0.452819	2.62768	7.19789	7.52942	5.80356	Tumor	BRCA
TCGA-E2-A2P5-01A	821	1	0.966238	1.78836	2.13126	6.74062	6.22285	Tumor	BRCA
TCGA-A8-A0A9-01A	822	0	0.98289	3.70897	3.51422	6.70334	6.2683	Tumor	BRCA
TCGA-A2-A0SV-01A	825	1	2.41226	3.43666	5.31027	7.58561	5.67828	Tumor	BRCA
TCGA-BH-A0HX-01A	829	0	1.0857	2.7969	3.93549	7.71112	6.08639	Tumor	BRCA
TCGA-E2-A108-01A	837	0	3.58229	2.92839	5.83982	7.51427	5.6045	Tumor	BRCA
TCGA-D8-A1XA-01A	839	0	1.05051	3.02597	4.13747	7.61917	6.1153	Tumor	BRCA
TCGA-E9-A6HE-01A	847	0	0.286789	3.56094	6.55884	6.32881	6.25339	Tumor	BRCA
TCGA-LQ-A4E4-01A	849	0	0.368782	2.55734	5.26077	6.59773	6.26947	Tumor	BRCA
TCGA-A1-A0SO-01A	852	0	1.12888	2.3459	3.64865	6.35252	5.9517	Tumor	BRCA
TCGA-BH-A201-01A	856	0	0.392647	3.6296	6.15528	7.95971	5.91707	Tumor	BRCA
TCGA-OL-A6VO-01A	858	0	1.89545	4.1478	4.00201	7.6574	5.93222	Tumor	BRCA
TCGA-B6-A0X4-01A	860	1	0.0956822	3.69589	4.62503	7.58734	5.74431	Tumor	BRCA
TCGA-E9-A1R0-01A	860	0	1.0113	3.05379	6.11729	7.51742	5.47963	Tumor	BRCA
TCGA-E2-A1IJ-01A	865	0	1.73926	2.31158	2.2562	7.21042	5.85315	Tumor	BRCA
TCGA-E2-A10E-01A	865	0	1.72656	3.47772	4.25597	7.47648	5.52637	Tumor	BRCA
TCGA-E2-A1B6-01A	867	0	4.13097	5.67008	1.9391	7.1506	6.75069	Tumor	BRCA
TCGA-EW-A1J6-01A	875	0	1.67826	2.78148	1.68493	6.24343	4.9877	Tumor	BRCA
TCGA-E2-A10F-01A	878	0	1.43848	2.73622	3.54823	7.31531	6.12126	Tumor	BRCA
TCGA-OL-A5RX-01A	878	0	1.51424	3.30077	5.03055	7.73781	6.02947	Tumor	BRCA
TCGA-E2-A1LE-01A	879	1	1.87695	2.93591	6.24656	7.15349	6.02096	Tumor	BRCA
TCGA-A8-A08C-01A	881	0	0.752881	1.95815	2.8315	7.23723	5.53219	Tumor	BRCA
TCGA-WT-AB44-01A	883	0	0.303279	2.20593	6.7734	6.63931	5.4567	Tumor	BRCA
TCGA-A8-A06U-01A	883	1	1.95943	3.14746	3.24604	7.74548	5.41007	Tumor	BRCA
TCGA-LL-A442-01A	889	0	0.148887	3.78554	3.45969	7.34022	5.96457	Tumor	BRCA
TCGA-AC-A4ZE-01A	890	0	1.11546	2.54188	4.57009	7.00264	5.69062	Tumor	BRCA
TCGA-A7-A13H-01A	899	0	2.13432	3.67756	4.30423	6.72163	5.85166	Tumor	BRCA
TCGA-E9-A2JS-01A	904	1	1.19241	2.72825	1.82531	7.09537	5.93087	Tumor	BRCA
TCGA-A7-A0DC-01A	906	0	0.104322	3.05315	4.04817	5.76462	4.88053	Tumor	BRCA
TCGA-EW-A1P4-01A	907	0	2.21292	4.9873	3.74209	6.77591	6.73145	Tumor	BRCA
TCGA-EW-A1OY-01A	908	0	0.936992	2.70822	5.60485	7.17674	5.69773	Tumor	BRCA
TCGA-EW-A1OX-01A	911	0	0.0822684	3.7219	1.47625	7.07845	6.52262	Tumor	BRCA
TCGA-BH-A0DI-01A	912	0	0.897755	2.37585	5.80075	7.35225	5.85109	Tumor	BRCA
TCGA-A8-A09K-01A	912	0	2.41692	1.94637	1.15587	7.95878	5.53738	Tumor	BRCA
TCGA-A2-A3XU-01A	912	1	0.0246207	2.86312	6.26046	7.00042	6.58087	Tumor	BRCA
TCGA-EW-A1P7-01A	915	0	2.88	4.08572	5.18743	6.90305	6.28504	Tumor	BRCA
TCGA-E9-A3QA-01A	918	0	3.94819	4.60376	4.48746	7.26116	7.00428	Tumor	BRCA
TCGA-BH-A18P-01A	921	1	1.66396	3.78917	2.89672	7.01363	5.87837	Tumor	BRCA
TCGA-BH-A0GY-01A	923	0	1.80937	2.51765	4.69151	8.37465	6.23427	Tumor	BRCA
TCGA-E9-A3X8-01A	926	0	1.393	4.11917	4.11724	6.44263	5.40182	Tumor	BRCA
TCGA-A7-A0CJ-01A	931	0	1.46496	5.8523	4.03771	6.49917	5.69537	Tumor	BRCA
TCGA-E2-A570-01A	931	0	0.593897	1.95099	2.38447	7.697	5.13323	Tumor	BRCA
TCGA-A8-A092-01A	942	0	1.41924	2.91259	1.84691	6.65389	5.87192	Tumor	BRCA
TCGA-A8-A08P-01A	943	0	3.51502	3.54747	4.20884	7.48943	6.43103	Tumor	BRCA
TCGA-A8-A08O-01A	943	0	0.504136	1.61773	3.25882	7.82138	6.01732	Tumor	BRCA
TCGA-BH-A0EE-01A	943	0	1.59082	4.81681	4.9662	6.67141	4.31759	Tumor	BRCA
TCGA-A8-A06X-01A	943	1	2.53322	4.97259	2.19695	7.51635	5.99586	Tumor	BRCA
TCGA-EW-A6SC-01A	952	0	1.37285	2.56216	3.48455	7.21049	5.35525	Tumor	BRCA
TCGA-A7-A26E-01A	954	0	1.06716	1.52711	1.73747	7.41645	5.44177	Tumor	BRCA
TCGA-BH-A1F2-01A	959	1	0.892218	1.58891	3.37358	7.62155	5.20639	Tumor	BRCA
TCGA-A7-A13D-01A	965	0	0	2.28997	7.05491	7.19524	5.78237	Tumor	BRCA
TCGA-A2-A0YM-01A	965	0	2.75669	3.20965	4.11488	6.44789	6.39457	Tumor	BRCA
TCGA-A1-A0SK-01A	967	1	0.126977	2.47532	4.11474	7.15288	6.14701	Tumor	BRCA
TCGA-A2-A0EV-01A	968	0	1.81365	2.50165	3.94717	7.64476	5.30368	Tumor	BRCA
TCGA-E2-A14X-01A	972	0	2.40963	3.37159	2.94561	7.67611	4.68222	Tumor	BRCA
TCGA-OL-A5D8-01A	973	0	1.54168	3.89315	3.06076	6.93787	5.73737	Tumor	BRCA
TCGA-BH-A0BC-01A	974	0	2.43311	3.22584	4.82248	6.92772	5.87375	Tumor	BRCA
TCGA-E2-A14W-01A	974	0	0.0370745	3.22649	1.97838	7.82905	6.25172	Tumor	BRCA
TCGA-E9-A227-01A	975	0	1.443	3.61998	2.99036	7.13129	5.53084	Tumor	BRCA
TCGA-A8-A07L-01A	975	0	0.729469	2.19601	1.07438	7.48274	6.71958	Tumor	BRCA
TCGA-E9-A1RB-01A	976	1	0.810201	1.94387	4.64616	7.17568	5.76052	Tumor	BRCA
TCGA-E2-A1B5-01A	984	0	3.45647	3.76	4.30435	7.64585	5.07616	Tumor	BRCA
TCGA-AC-A3BB-01A	987	0	2.09163	3.7836	6.74337	7.25355	5.82453	Tumor	BRCA
TCGA-AQ-A1H3-01A	989	0	1.57531	2.00056	4.20554	7.7907	5.718	Tumor	BRCA
TCGA-A2-A0YC-01A	990	0	1.1561	3.33543	4.39064	7.34624	5.51892	Tumor	BRCA
TCGA-BH-A0EA-01A	991	1	0.396416	2.45608	4.9803	7.4348	5.59184	Tumor	BRCA
TCGA-B6-A0I6-01A	991	1	1.03617	2.61385	3.11386	7.11537	6.60437	Tumor	BRCA
TCGA-A2-A3XV-01A	996	0	0.322787	5.29266	3.34982	6.3275	5.14784	Tumor	BRCA
TCGA-LL-A441-01A	996	0	3.39822	4.56938	3.84837	7.15608	6.82144	Tumor	BRCA
TCGA-AO-A0J2-01A	997	0	1.85695	5.14289	5.57188	6.97087	5.72771	Tumor	BRCA
TCGA-E9-A1N4-01A	1000	0	1.06503	2.88629	2.65422	7.52212	5.3487	Tumor	BRCA
TCGA-E9-A3Q9-01A	1001	0	0.616632	2.8072	4.6302	6.68702	4.77099	Tumor	BRCA
TCGA-BH-A18F-01A	1001	0	1.74212	3.00554	5.65082	7.42177	5.31916	Tumor	BRCA
TCGA-AQ-A54O-01A	1001	0	0.760623	2.98126	2.74177	6.37247	4.92698	Tumor	BRCA
TCGA-A8-A08F-01A	1004	0	2.2079	3.58503	2.65227	7.71206	5.36716	Tumor	BRCA
TCGA-A8-A091-01A	1004	0	0.855778	2.45521	2.94939	7.05337	5.60111	Tumor	BRCA
TCGA-E2-A1B4-01A	1004	1	0.872338	2.71297	3.13743	7.58579	5.86758	Tumor	BRCA
TCGA-A8-A08S-01A	1004	0	0.836966	3.54746	2.92623	6.63864	5.78106	Tumor	BRCA
TCGA-AC-A2QH-01B	1005	0	0.0653181	1.103	3.34773	4.73359	4.8931	Tumor	BRCA
TCGA-A8-A09M-01A	1006	0	2.36741	3.70504	1.17342	7.08527	6.1729	Tumor	BRCA
TCGA-A7-A0DB-01A	1007	0	0.375418	1.70877	4.25351	6.8598	5.02057	Tumor	BRCA
TCGA-BH-A1FD-01A	1009	1	1.74812	3.70823	2.07685	8.157	6.15477	Tumor	BRCA
TCGA-EW-A6SD-01A	1010	0	2.16032	3.60013	3.67053	6.93886	5.3417	Tumor	BRCA
TCGA-AR-A5QN-01A	1013	0	1.07129	4.73111	6.06203	7.67194	6.18846	Tumor	BRCA
TCGA-D8-A3Z5-01A	1015	0	0.521314	3.2393	5.26616	6.91767	6.19727	Tumor	BRCA
TCGA-E2-A1II-01A	1025	0	4.45604	4.03233	1.95754	7.02559	7.6769	Tumor	BRCA
TCGA-AR-A1AY-01A	1026	0	0.304201	1.67465	4.40076	7.29732	6.04244	Tumor	BRCA
TCGA-E2-A1IH-01A	1026	0	2.89146	1.96232	2.89455	7.90041	5.47236	Tumor	BRCA
TCGA-A2-A0D2-01A	1027	0	2.19148	3.77725	3.87461	7.73382	6.60046	Tumor	BRCA
TCGA-A2-A3XS-01A	1032	1	1.77165	4.28166	2.77104	7.32189	6.08329	Tumor	BRCA
TCGA-A8-A07C-01A	1034	0	3.26489	2.17722	2.19131	6.59794	6.18057	Tumor	BRCA
TCGA-C8-A3M7-01A	1034	1	1.17028	2.80063	2.59747	7.78413	5.41071	Tumor	BRCA
TCGA-BH-A1FH-01A	1034	1	0.542963	3.33779	4.0303	7.65987	6.08512	Tumor	BRCA
TCGA-EW-A3E8-01B	1035	0	2.70042	4.0121	5.49701	7.18253	5.72563	Tumor	BRCA
TCGA-E9-A1N8-01A	1039	0	0.675953	2.66799	4.50398	7.15859	7.0693	Tumor	BRCA
TCGA-E2-A14V-01A	1042	0	0.642127	2.86847	2.86478	7.4553	5.89519	Tumor	BRCA
TCGA-A2-A0EU-01A	1043	0	1.11853	2.90822	3.16245	7.85816	6.0845	Tumor	BRCA
TCGA-E2-A576-01A	1043	0	1.04494	3.25061	4.47619	6.01244	6.20185	Tumor	BRCA
TCGA-A7-A0CG-01A	1043	0	2.27484	3.19828	3.97849	7.21174	4.84052	Tumor	BRCA
TCGA-E2-A107-01A	1047	0	0.654108	2.3873	3.04794	7.27228	6.78066	Tumor	BRCA
TCGA-E9-A226-01A	1048	1	2.78823	2.31292	0.986347	7.72727	5.69095	Tumor	BRCA
TCGA-E2-A2P6-01A	1051	0	0.415125	3.0797	2.62304	6.68926	5.76595	Tumor	BRCA
TCGA-EW-A1PG-01A	1051	0	0.425641	2.83326	8.0148	8.03247	5.92792	Tumor	BRCA
TCGA-A2-A0D1-01A	1051	0	0.77747	2.76537	3.23532	6.23566	6.1628	Tumor	BRCA
TCGA-E9-A1N3-01A	1059	0	0.197504	3.41998	2.49081	7.76822	5.53702	Tumor	BRCA
TCGA-OL-A5RV-01A	1062	0	1.21801	3.75584	4.15878	7.49851	6.14774	Tumor	BRCA
TCGA-E2-A573-01A	1062	0	3.30004	4.42152	4.71081	7.32408	5.45293	Tumor	BRCA
TCGA-E9-A1R2-01A	1063	0	1.87639	3.40855	5.36733	7.26064	5.88637	Tumor	BRCA
TCGA-A2-A0ET-01A	1066	0	1.56939	3.21156	4.44086	7.67216	5.77165	Tumor	BRCA
TCGA-E9-A1NF-01A	1072	1	1.33052	2.73223	3.52079	7.28462	5.86202	Tumor	BRCA
TCGA-A7-A0CE-01A	1074	0	1.20877	4.10696	8.52114	7.55791	6.5605	Tumor	BRCA
TCGA-A7-A0CH-01A	1079	0	0.513387	1.58793	1.93504	7.12369	5.13562	Tumor	BRCA
TCGA-A7-A0DA-01A	1085	0	0.39014	4.4662	5.00477	8.06534	5.55394	Tumor	BRCA
TCGA-E9-A1NE-01A	1088	0	3.90373	3.84264	3.39883	7.52954	5.55177	Tumor	BRCA
TCGA-A2-A3XY-01A	1093	1	3.87258	4.49396	6.93603	7.32671	7.17384	Tumor	BRCA
TCGA-BH-A18I-01A	1093	0	2.77846	2.80902	3.5089	7.72288	5.64303	Tumor	BRCA
TCGA-A2-A04Y-01A	1099	0	1.77407	3.04869	3.83587	7.01622	5.91819	Tumor	BRCA
TCGA-E9-A1N9-01A	1101	0	1.47436	1.63666	3.19428	7.49399	5.94445	Tumor	BRCA
TCGA-A2-A3KC-01A	1102	0	0.861253	3.58724	4.64932	6.98596	5.9566	Tumor	BRCA
TCGA-OL-A5D6-01A	1104	1	1.00492	3.73305	5.10899	7.04495	6.21706	Tumor	BRCA
TCGA-OL-A5RW-01A	1106	0	1.52826	6.02841	4.80771	6.83575	5.89844	Tumor	BRCA
TCGA-E9-A1NA-01A	1112	0	2.00723	4.64328	4.86044	7.1428	6.39275	Tumor	BRCA
TCGA-BH-A28Q-01A	1119	0	0.83832	3.09044	2.79828	7.22251	5.53357	Tumor	BRCA
TCGA-E9-A1N5-01A	1120	0	1.67853	3.3361	3.37605	7.07886	5.92904	Tumor	BRCA
TCGA-BH-A28O-01A	1120	0	0.864626	3.63536	5.91676	7.48416	6.15949	Tumor	BRCA
TCGA-BH-A0HQ-01A	1121	0	0.150324	1.98505	1.86124	7.05651	5.73735	Tumor	BRCA
TCGA-A8-A085-01A	1124	0	0	3.03383	1.73822	6.98985	5.67249	Tumor	BRCA
TCGA-A8-A08J-01A	1127	1	1.32766	3.27284	2.46294	7.42156	6.03844	Tumor	BRCA
TCGA-BH-A0BA-01A	1132	0	0.996058	3.99042	5.68309	7.6615	5.22158	Tumor	BRCA
TCGA-E2-A1BD-01A	1133	0	0.293451	2.12691	1.80486	7.28413	5.90326	Tumor	BRCA
TCGA-E2-A1IF-01A	1138	0	0.839982	3.1733	5.38426	7.03707	6.07729	Tumor	BRCA
TCGA-A7-A0D9-01A	1139	0	0.414391	3.74847	4.52601	8.28204	6.46781	Tumor	BRCA
TCGA-AO-A0J6-01A	1140	0	2.14036	3.46165	7.48018	7.56922	6.1475	Tumor	BRCA
TCGA-E2-A10B-01A	1141	0	1.49418	2.44806	3.56147	7.09739	5.74216	Tumor	BRCA
TCGA-BH-A18R-01A	1142	1	1.66253	2.11201	2.40679	7.51295	6.15374	Tumor	BRCA
TCGA-E9-A229-01A	1148	0	2.48206	3.38261	1.68624	7.3335	5.43951	Tumor	BRCA
TCGA-BH-A0B1-01A	1148	0	1.16128	1.76156	5.85558	7.52143	6.39002	Tumor	BRCA
TCGA-AR-A1AS-01A	1150	0	0.165149	1.92571	6.31378	7.11493	5.63757	Tumor	BRCA
TCGA-B6-A3ZX-01A	1152	1	4.50568	4.47434	1.93862	6.3895	5.90804	Tumor	BRCA
TCGA-BH-A0DH-01A	1156	0	0.728924	2.59352	3.12206	7.17143	5.07104	Tumor	BRCA
TCGA-A8-A08B-01A	1156	0	2.52172	4.06076	4.38547	7.12896	4.88903	Tumor	BRCA
TCGA-A8-A0AD-01A	1157	0	0.905637	3.28155	2.71245	7.61588	5.88005	Tumor	BRCA
TCGA-E9-A3HO-01A	1158	0	1.46824	2.18246	2.6327	6.72483	4.44532	Tumor	BRCA
TCGA-AR-A2LN-01A	1161	0	1.14925	3.3195	5.29462	7.54199	5.37596	Tumor	BRCA
TCGA-GM-A3NY-01A	1162	0	0.747032	2.78445	3.56973	6.51325	5.60746	Tumor	BRCA
TCGA-E2-A14Q-01A	1163	0	1.00887	2.94379	4.20283	7.73676	5.21107	Tumor	BRCA
TCGA-A7-A0CD-01A	1165	0	0.420685	3.87708	1.84368	6.90187	6.24308	Tumor	BRCA
TCGA-E9-A22B-01A	1167	0	0.702129	4.33963	4.03808	7.01543	5.89288	Tumor	BRCA
TCGA-E2-A14R-01A	1174	0	2.1446	3.60373	5.97208	7.76773	5.53261	Tumor	BRCA
TCGA-BH-A203-01A	1174	1	2.72386	2.51315	4.45974	7.75826	6.6292	Tumor	BRCA
TCGA-E2-A574-01A	1179	0	0.0325253	2.78604	4.44942	6.91625	6.82743	Tumor	BRCA
TCGA-AR-A5QP-01A	1185	0	0.451814	3.15505	4.37403	7.92229	5.28063	Tumor	BRCA
TCGA-E9-A247-01A	1186	0	0.628162	1.84854	2.95711	7.80732	6.16921	Tumor	BRCA
TCGA-E9-A22A-01A	1189	0	2.42824	3.84688	2.41621	7.55109	5.36229	Tumor	BRCA
TCGA-BH-A0B4-01A	1191	0	0.744207	2.05397	2.66641	6.59937	5.71183	Tumor	BRCA
TCGA-A1-A0SN-01A	1196	0	2.19647	3.43739	4.0826	7.52539	6.72193	Tumor	BRCA
TCGA-AR-A2LO-01A	1198	0	3.06049	3.73884	3.63912	6.99593	6.09573	Tumor	BRCA
TCGA-BH-A0B3-01A	1203	0	2.42191	3.50555	6.48641	7.3133	6.26761	Tumor	BRCA
TCGA-E9-A1NC-01A	1203	0	2.195	4.72803	5.08534	7.50485	6.51919	Tumor	BRCA
TCGA-A2-A3KD-01A	1206	0	0.792755	2.61759	3.6488	7.03768	5.87446	Tumor	BRCA
TCGA-E2-A572-01A	1208	0	0.207091	4.94413	5.73568	6.23433	5.74002	Tumor	BRCA
TCGA-EW-A1IX-01A	1208	0	1.52664	2.29959	3.19941	7.26544	6.41285	Tumor	BRCA
TCGA-EW-A1P1-01A	1210	0	2.30203	2.70246	7.28676	7.97714	5.98249	Tumor	BRCA
TCGA-A8-A08Z-01A	1217	0	1.41146	2.0726	5.41666	7.58178	5.26499	Tumor	BRCA
TCGA-OL-A5RU-01A	1219	0	1.93103	4.12401	4.66326	7.10415	5.03554	Tumor	BRCA
TCGA-OL-A6VR-01A	1220	0	0.114392	4.59226	2.17553	7.33074	6.13353	Tumor	BRCA
TCGA-E2-A10C-01A	1220	0	1.69297	2.74718	3.19022	6.84579	5.41003	Tumor	BRCA
TCGA-E9-A1RC-01A	1224	0	0.0496451	1.29801	5.7383	7.92155	5.40443	Tumor	BRCA
TCGA-E2-A10A-01A	1229	0	0.602416	4.07327	2.38071	7.36945	5.9894	Tumor	BRCA
TCGA-EW-A1OZ-01A	1229	0	1.57371	2.8845	5.40928	7.10675	5.30793	Tumor	BRCA
TCGA-E9-A22H-01A	1232	0	2.01226	3.77779	1.30336	7.28647	4.9284	Tumor	BRCA
TCGA-AR-A2LQ-01A	1233	0	0.743617	3.61881	5.93939	7.35581	5.7617	Tumor	BRCA
TCGA-AC-A2FB-01A	1234	0	3.73199	4.57802	2.34751	7.04665	5.35587	Tumor	BRCA
TCGA-AO-A12H-01A	1234	0	0.0966422	3.5098	1.0881	7.61057	5.84439	Tumor	BRCA
TCGA-E9-A22G-01A	1239	0	1.5987	3.31412	2.26699	7.00819	6.95427	Tumor	BRCA
TCGA-E2-A14P-01A	1246	0	1.5928	4.00685	4.30482	7.35963	5.79312	Tumor	BRCA
TCGA-BH-A0H9-01A	1247	0	0.530715	1.59291	5.91738	7.05237	6.38603	Tumor	BRCA
TCGA-E9-A22D-01A	1248	0	3.53099	4.84717	0.727524	7.04032	5.99374	Tumor	BRCA
TCGA-EW-A1P0-01A	1251	0	1.95256	4.20154	3.33804	8.26594	5.14225	Tumor	BRCA
TCGA-E9-A1ND-01A	1266	0	3.88879	3.99453	5.11336	6.88477	6.13847	Tumor	BRCA
TCGA-E9-A22E-01A	1269	0	1.404	2.69178	2.52593	7.71937	5.87002	Tumor	BRCA
TCGA-BH-A0C0-01A	1270	0	3.94088	4.5778	4.02431	7.13802	5.58346	Tumor	BRCA
TCGA-AR-A1AT-01A	1272	1	2.8335	3.85746	2.56019	6.49266	6.0155	Tumor	BRCA
TCGA-OL-A66K-01A	1275	1	0.155311	2.09303	4.90736	7.68098	5.49205	Tumor	BRCA
TCGA-A8-A095-01A	1277	0	1.40354	2.29209	3.46671	7.24168	5.3656	Tumor	BRCA
TCGA-E9-A228-01A	1285	0	0.29855	3.23539	2.32063	7.17404	5.54019	Tumor	BRCA
TCGA-BH-A1EU-01A	1286	1	2.78813	2.58375	5.00682	7.49724	5.02702	Tumor	BRCA
TCGA-BH-A0W5-01A	1288	0	3.6165	3.77687	3.00544	7.34036	5.20659	Tumor	BRCA
TCGA-A2-A25B-01A	1291	0	1.72574	2.48476	1.84625	7.38382	5.01175	Tumor	BRCA
TCGA-OL-A66L-01A	1301	0	1.15449	4.07726	6.8103	6.76874	5.89726	Tumor	BRCA
TCGA-A8-A07B-01A	1308	0	1.41065	2.97721	0.964745	7.33055	5.68478	Tumor	BRCA
TCGA-A8-A08X-01A	1308	0	1.94132	3.50229	3.68772	6.45075	4.54337	Tumor	BRCA
TCGA-E2-A105-01A	1308	0	0.477528	2.52529	4.59853	7.03729	6.10266	Tumor	BRCA
TCGA-D8-A1XW-01A	1309	0	2.19501	2.17621	2.17373	8.36686	4.92854	Tumor	BRCA
TCGA-E2-A1LL-01A	1309	0	1.17226	3.48539	6.24852	7.39919	5.99009	Tumor	BRCA
TCGA-E2-A14U-01A	1318	0	0.474375	2.57736	3.47663	7.2144	6.11834	Tumor	BRCA
TCGA-A1-A0SE-01A	1321	0	0.611704	2.90328	2.77861	7.12866	5.58865	Tumor	BRCA
TCGA-BH-A0BF-01A	1324	1	2.92597	4.15875	3.23672	6.98358	5.62595	Tumor	BRCA
TCGA-E2-A3DX-01A	1325	0	2.57971	3.87171	3.79697	7.35971	5.95875	Tumor	BRCA
TCGA-B6-A1KC-01B	1326	0	0.434576	1.25641	1.24095	6.97546	5.0139	Tumor	BRCA
TCGA-GM-A3XG-01A	1330	0	0.441442	3.47638	4.43433	7.4715	6.32888	Tumor	BRCA
TCGA-A2-A0SY-01A	1347	0	1.33008	2.45613	4.24664	7.11144	5.15979	Tumor	BRCA
TCGA-AO-A03V-01A	1351	0	1.15945	4.32206	4.99657	7.44831	5.74038	Tumor	BRCA
TCGA-E2-A14O-01A	1359	0	0.238409	1.25959	5.20872	7.04924	6.10552	Tumor	BRCA
TCGA-BH-A0E7-01A	1363	0	0.271818	1.61847	1.43364	7.53768	5.51853	Tumor	BRCA
TCGA-BH-A0W7-01A	1363	0	2.76442	3.81892	4.79842	6.7323	5.99969	Tumor	BRCA
TCGA-A2-A0SW-01A	1365	1	1.94032	3.521	4.01929	6.99638	5.18608	Tumor	BRCA
TCGA-E9-A1RA-01A	1369	0	1.18016	2.7718	3.71616	7.23264	5.99655	Tumor	BRCA
TCGA-A8-A09I-01A	1371	0	2.83986	4.19127	2.79915	7.08261	5.14051	Tumor	BRCA
TCGA-A8-A07Z-01A	1371	0	1.27193	4.12439	3.31443	7.37061	5.85602	Tumor	BRCA
TCGA-BH-A1FM-01A	1388	1	0.235422	0.76047	2.80875	8.04897	4.30292	Tumor	BRCA
TCGA-BH-A0C1-01B	1411	1	1.70959	2.29423	2.67941	7.16311	5.59727	Tumor	BRCA
TCGA-E9-A1RH-01A	1417	0	0.878393	1.76666	7.05093	7.42249	4.50263	Tumor	BRCA
TCGA-E2-A109-01A	1417	0	1.6471	3.92019	2.89481	7.35659	6.74081	Tumor	BRCA
TCGA-E9-A1RE-01A	1419	0	0.973486	1.73833	3.26303	7.01997	5.59531	Tumor	BRCA
TCGA-PE-A5DC-01A	1430	1	0.544693	4.1557	3.86732	7.0639	6.08928	Tumor	BRCA
TCGA-E2-A14N-01A	1434	0	2.78277	3.04454	3.82379	7.31649	6.87746	Tumor	BRCA
TCGA-A1-A0SH-01A	1437	0	0.45261	2.44738	1.33609	7.27952	5.72805	Tumor	BRCA
TCGA-A2-A3XX-01A	1439	1	1.89765	3.99388	5.11349	7.09048	5.95518	Tumor	BRCA
TCGA-3C-AALK-01A	1448	0	0.874742	3.15294	2.38406	6.58535	6.21809	Tumor	BRCA
TCGA-E9-A1RI-01A	1449	0	1.22599	2.27313	1.53015	7.72849	5.31487	Tumor	BRCA
TCGA-D8-A27K-01A	1461	0	1.99643	2.25204	2.62785	7.23131	5.48447	Tumor	BRCA
TCGA-A1-A0SF-01A	1463	0	1.71731	3.1818	2.73648	7.24886	6.04029	Tumor	BRCA
TCGA-E9-A1R7-01A	1467	0	0.553982	1.42313	2.08866	7.08144	5.48477	Tumor	BRCA
TCGA-A2-A0CO-01A	1468	1	3.69166	4.2888	7.02106	7.17345	5.8365	Tumor	BRCA
TCGA-5L-AAT1-01A	1471	0	2.91575	4.40129	2.06038	6.90025	5.51078	Tumor	BRCA
TCGA-3C-AALJ-01A	1474	0	1.50775	3.28272	6.50395	6.60027	6.84836	Tumor	BRCA
TCGA-A2-A0YL-01A	1474	0	1.34764	2.19486	2.57624	7.3837	5.88738	Tumor	BRCA
TCGA-C8-A12Y-01A	1476	0	1.10765	4.30491	2.69793	7.63209	5.92489	Tumor	BRCA
TCGA-5L-AAT0-01A	1477	0	2.12544	2.4557	2.33394	6.64085	5.41764	Tumor	BRCA
TCGA-A8-A09E-01A	1492	0	0.490682	3.01731	3.55049	7.37346	5.50182	Tumor	BRCA
TCGA-A2-A0YI-01A	1505	0	2.1252	2.94745	2.54369	7.39956	5.82737	Tumor	BRCA
TCGA-BH-A1EX-01A	1508	1	1.91944	1.30043	2.8154	7.70774	5.00238	Tumor	BRCA
TCGA-A2-A0T3-01A	1516	0	0.518355	3.97477	4.45696	6.84697	6.32434	Tumor	BRCA
TCGA-BH-A0BV-01A	1519	0	1.21254	3.33677	1.89738	7.22502	6.14913	Tumor	BRCA
TCGA-A8-A09D-01A	1522	0	1.41645	2.83683	5.7154	7.35216	5.20312	Tumor	BRCA
TCGA-E2-A1LG-01A	1523	0	0.984865	2.20061	5.26412	7.48564	5.1808	Tumor	BRCA
TCGA-AO-A0JI-01A	1528	0	0.488448	3.16075	1.82763	7.16402	5.92878	Tumor	BRCA
TCGA-A2-A3XZ-01A	1532	0	3.30432	3.75676	2.41191	7.40728	6.3482	Tumor	BRCA
TCGA-A2-A0SX-01A	1534	0	3.52005	3.66535	3.98588	6.97458	5.39694	Tumor	BRCA
TCGA-A2-A0YF-01A	1535	0	0.737543	3.26464	2.25315	7.5007	5.09897	Tumor	BRCA
TCGA-AO-A0JB-01A	1542	0	0.102023	2.55331	2.94048	5.14268	5.08812	Tumor	BRCA
TCGA-BH-A0HY-01A	1545	0	0.42604	2.27723	4.18299	6.93371	5.8448	Tumor	BRCA
TCGA-A2-A3Y0-01A	1546	0	2.92603	3.70396	7.36138	6.9991	6.74055	Tumor	BRCA
TCGA-AO-A0JC-01A	1547	0	5.44522	5.20955	3.313	6.85847	4.21033	Tumor	BRCA
TCGA-AR-A24K-01A	1548	0	0.555642	2.35243	2.10304	7.72772	5.29244	Tumor	BRCA
TCGA-AR-A24W-01A	1550	0	0.66643	2.29956	5.39389	7.93047	5.08277	Tumor	BRCA
TCGA-BH-A18V-01A	1556	1	2.59201	3.22331	3.87988	7.67796	6.39493	Tumor	BRCA
TCGA-BH-A18V-06A	1556	1	3.9357	3.4799	5.25547	6.94319	6.37371	Tumor	BRCA
TCGA-BH-A0HW-01A	1561	0	0.224597	3.70954	1.86901	7.55736	5.84604	Tumor	BRCA
TCGA-BH-A18U-01A	1563	1	2.04229	2.51398	4.35186	7.1067	4.93429	Tumor	BRCA
TCGA-E2-A15T-01A	1563	0	0.283579	2.22741	2.71777	7.11575	5.96379	Tumor	BRCA
TCGA-BH-A0B8-01A	1569	0	0.413671	2.67084	3.08507	7.6859	5.8131	Tumor	BRCA
TCGA-BH-A0B9-01A	1572	0	3.34116	3.79033	2.03869	7.14773	6.86236	Tumor	BRCA
TCGA-AO-A0J4-01A	1587	0	2.94281	4.39547	5.16023	7.79011	6.43647	Tumor	BRCA
TCGA-A2-A259-01A	1596	0	2.11945	3.05943	3.76653	7.86167	5.86127	Tumor	BRCA
TCGA-E2-A1LS-01A	1604	0	0.301295	0.623386	0.42691	6.28675	4.24167	Tumor	BRCA
TCGA-EW-A2FS-01A	1604	0	1.39463	4.0255	1.90198	6.85448	5.81673	Tumor	BRCA
TCGA-EW-A1P3-01A	1611	0	0.640031	2.34439	3.83684	7.59139	6.00386	Tumor	BRCA
TCGA-BH-A0HA-01A	1611	0	2.72363	4.33307	2.47753	7.5633	6.08878	Tumor	BRCA
TCGA-WT-AB41-01A	1611	0	2.92069	5.47172	5.20513	5.80381	5.26157	Tumor	BRCA
TCGA-D8-A1JG-01B	1612	0	2.98985	4.19001	4.14958	7.35491	4.59372	Tumor	BRCA
TCGA-AO-A0J9-01A	1613	0	0.676683	1.5415	6.11993	6.49521	5.54901	Tumor	BRCA
TCGA-A8-A06T-01A	1614	0	1.92285	3.45652	2.69585	8.05089	5.25921	Tumor	BRCA
TCGA-A2-A0CZ-01A	1616	0	1.32659	2.62157	5.01222	7.06784	5.76106	Tumor	BRCA
TCGA-BH-A0H5-01A	1620	0	3.83441	4.99546	3.29497	6.98817	5.21229	Tumor	BRCA
TCGA-E2-A1B0-01A	1631	0	1.97709	2.58848	6.45185	7.56212	5.13253	Tumor	BRCA
TCGA-AO-A12G-01A	1639	0	0.843339	2.20595	1.31554	6.69516	4.60493	Tumor	BRCA
TCGA-E2-A15J-01A	1640	0	0.201763	2.99481	2.14657	6.95149	6.09939	Tumor	BRCA
TCGA-A8-A076-01A	1642	0	1.7252	3.25176	3.19316	6.89671	6.05756	Tumor	BRCA
TCGA-BH-A1FR-01A	1642	1	1.03936	2.18943	2.7999	7.48586	5.45655	Tumor	BRCA
TCGA-BH-A0DO-01B	1644	0	0.482606	1.84219	4.5841	7.19472	6.07523	Tumor	BRCA
TCGA-E2-A1L6-01A	1648	0	0.826921	2.74064	2.7152	7.35143	5.99403	Tumor	BRCA
TCGA-AR-A2LK-01A	1649	1	1.06866	1.45968	1.64552	6.79981	5.8583	Tumor	BRCA
TCGA-A2-A0SU-01A	1662	0	1.53001	1.86588	2.5713	7.6956	5.22694	Tumor	BRCA
TCGA-EW-A2FR-01A	1673	0	1.8921	3.93782	4.04077	7.82407	5.83653	Tumor	BRCA
TCGA-BH-A1FL-01A	1673	1	1.04275	1.71262	4.1112	7.19494	6.07034	Tumor	BRCA
TCGA-A2-A0CY-01A	1673	0	0.490518	3.60237	4.70321	5.97296	6.03044	Tumor	BRCA
TCGA-D8-A1XO-01A	1682	0	1.12111	1.37111	1.82694	7.4123	5.88896	Tumor	BRCA
TCGA-AO-A0JL-01A	1683	0	0.193566	2.15014	4.93627	6.01433	5.44498	Tumor	BRCA
TCGA-A2-A04X-01A	1686	0	2.66759	5.60378	1.72997	7.17534	5.45926	Tumor	BRCA
TCGA-D8-A1JB-01A	1688	0	3.45025	3.71964	1.27208	7.90411	5.35928	Tumor	BRCA
TCGA-BH-A1FU-01A	1688	1	2.0105	3.23663	4.2166	7.06207	6.21658	Tumor	BRCA
TCGA-E2-A15I-01A	1692	0	2.48759	1.84964	4.31864	7.37186	5.3482	Tumor	BRCA
TCGA-BH-A18Q-01A	1692	1	2.17408	3.25069	3.66149	7.07115	5.92892	Tumor	BRCA
TCGA-BH-A1EW-01A	1694	1	2.39765	4.06069	5.44086	7.30822	6.05579	Tumor	BRCA
TCGA-AR-A0TY-01A	1699	1	0.196805	4.08193	3.72327	8.14403	6.60506	Tumor	BRCA
TCGA-A2-A3XW-01A	1712	0	1.27856	3.83616	5.0468	7.0308	6.1044	Tumor	BRCA
TCGA-D8-A13Y-01A	1728	0	0.102544	3.29974	1.8547	7.73357	5.44451	Tumor	BRCA
TCGA-A2-A0CX-01A	1728	0	1.89346	2.88208	4.18359	6.59369	6.04443	Tumor	BRCA
TCGA-E2-A15R-01A	1732	0	0.0710453	1.1668	2.07982	7.66655	5.28378	Tumor	BRCA
TCGA-AR-A2LR-01A	1742	0	0.758782	2.62053	5.69343	7.14685	6.10501	Tumor	BRCA
TCGA-BH-A208-01A	1759	1	0.976732	3.15011	1.94189	7.37288	5.75914	Tumor	BRCA
TCGA-OL-A5D7-01A	1780	0	2.92254	4.22568	3.36924	6.97751	8.09874	Tumor	BRCA
TCGA-B6-A0X7-01A	1781	1	0.308318	1.87763	3.44098	7.12954	5.95257	Tumor	BRCA
TCGA-OL-A5DA-01A	1783	0	1.42704	3.81855	1.73595	6.90162	5.66262	Tumor	BRCA
TCGA-AO-A03U-01B	1793	1	0.642124	2.8973	8.95342	7.55145	6.07737	Tumor	BRCA
TCGA-E2-A1IK-01A	1800	0	1.58591	4.06862	2.69833	7.26889	5.58557	Tumor	BRCA
TCGA-GM-A2D9-01A	1812	1	0.350277	2.92164	4.59307	6.83614	5.29472	Tumor	BRCA
TCGA-BH-A0AV-01A	1820	0	0.613019	3.68062	4.70829	7.5128	6.30189	Tumor	BRCA
TCGA-E2-A1L7-01A	1836	0	2.65355	4.53205	3.21684	7.06335	5.7299	Tumor	BRCA
TCGA-AO-A12F-01A	1842	0	0.213235	1.4007	7.3125	7.21738	6.85328	Tumor	BRCA
TCGA-A2-A1FX-01A	1847	0	1.38824	3.34321	3.41268	7.85837	6.04598	Tumor	BRCA
TCGA-AC-A2FG-01A	1853	0	0.380984	2.61799	5.1299	7.72777	5.49799	Tumor	BRCA
TCGA-E2-A1IO-01A	1855	0	2.23266	3.22225	3.54346	7.14526	6.67733	Tumor	BRCA
TCGA-AR-A1AV-01A	1864	0	0.23325	3.65432	3.34528	7.45992	5.51283	Tumor	BRCA
TCGA-AO-A03M-01B	1866	0	3.38893	3.32583	2.54714	7.11962	5.28646	Tumor	BRCA
TCGA-BH-A0BG-01A	1871	0	3.02969	4.1177	5.08305	7.74495	6.80568	Tumor	BRCA
TCGA-A2-A0D3-01A	1873	0	1.50611	2.29134	3.52549	7.10435	5.55645	Tumor	BRCA
TCGA-BH-A0BM-01A	1876	0	0.520447	2.81499	5.015	7.46765	5.29546	Tumor	BRCA
TCGA-AO-A1KQ-01A	1882	0	1.94827	3.6001	2.00725	7.36935	6.8031	Tumor	BRCA
TCGA-A2-A0EW-01A	1884	1	1.31199	2.60874	5.60175	7.69293	5.51478	Tumor	BRCA
TCGA-AO-A0JJ-01A	1887	0	1.935	3.0991	3.89615	7.18153	5.92175	Tumor	BRCA
TCGA-HN-A2OB-01A	1900	1	0.511693	3.02446	6.13467	6.94819	6.03267	Tumor	BRCA
TCGA-BH-A0AU-01A	1914	0	2.18261	2.72001	3.41601	7.36824	6.35543	Tumor	BRCA
TCGA-BH-A0AZ-01A	1919	0	0.663658	3.26488	3.66828	7.23663	5.74779	Tumor	BRCA
TCGA-A2-A04V-01A	1920	1	0.377231	1.58888	3.49631	6.78762	5.69299	Tumor	BRCA
TCGA-A2-A0EY-01A	1925	0	1.14459	2.13905	1.99319	6.63449	5.58169	Tumor	BRCA
TCGA-BH-A0EI-01A	1926	0	0.530626	2.42444	1.69128	7.58534	5.73978	Tumor	BRCA
TCGA-BH-A1FJ-01A	1927	1	0.475672	2.61986	0.973699	7.55677	5.56752	Tumor	BRCA
TCGA-BH-A0H3-01A	1928	0	1.2605	2.78153	2.44337	7.34221	5.69297	Tumor	BRCA
TCGA-AR-A2LM-01A	1935	0	0.803864	2.27185	3.64929	7.01412	5.57227	Tumor	BRCA
TCGA-E2-A150-01A	1935	0	2.74395	2.9353	4.18508	7.9499	7.65456	Tumor	BRCA
TCGA-PE-A5DD-01A	1953	0	1.27738	2.4137	4.66326	6.72976	5.89115	Tumor	BRCA
TCGA-AR-A0TX-01A	1972	0	2.96439	3.25294	3.0048	6.72024	4.70847	Tumor	BRCA
TCGA-AO-A0JF-01A	1980	0	1.37576	2.14069	5.42884	7.50978	5.59727	Tumor	BRCA
TCGA-AR-A0U0-01A	1988	0	3.96749	5.01665	6.07038	7.78607	6.15174	Tumor	BRCA
TCGA-B6-A0IE-01A	1993	1	0.293565	3.66719	2.22725	6.75149	5.88093	Tumor	BRCA
TCGA-OL-A66J-01A	1996	0	0.561768	4.55217	6.81742	7.16448	6.21786	Tumor	BRCA
TCGA-BH-A18S-01A	2009	1	0.188671	3.2243	2.83733	7.69528	5.44301	Tumor	BRCA
TCGA-AR-A2LL-01A	2012	0	0.744782	2.13696	3.26224	6.74668	5.86533	Tumor	BRCA
TCGA-GM-A3XN-01A	2019	0	1.52038	3.04436	6.65576	7.21357	5.82004	Tumor	BRCA
TCGA-AO-A03N-01B	2031	0	0.27724	1.68346	1.8579	6.51436	4.60266	Tumor	BRCA
TCGA-V7-A7HQ-01A	2033	0	0.210717	2.97525	3.68292	5.81858	5.67951	Tumor	BRCA
TCGA-BH-A0DG-01A	2041	0	2.164	3.21551	3.82032	6.96209	5.20912	Tumor	BRCA
TCGA-A2-A0D0-01A	2048	0	1.98887	2.64483	5.92917	7.14844	7.08941	Tumor	BRCA
TCGA-BH-A0DV-01A	2064	0	0.123496	2.30524	5.2338	7.36582	5.62862	Tumor	BRCA
TCGA-B6-A408-01A	2072	0	3.28474	4.42279	4.7266	6.90434	5.64702	Tumor	BRCA
TCGA-B6-A0RG-01A	2082	0	0.464964	3.70166	2.99127	7.67899	6.37813	Tumor	BRCA
TCGA-AO-A03R-01A	2091	0	1.13013	2.30124	4.90242	6.67155	5.48091	Tumor	BRCA
TCGA-B6-A0X5-01A	2097	1	0.418914	1.68657	2.08115	7.16471	5.72039	Tumor	BRCA
TCGA-GM-A3XL-01A	2108	0	2.20795	4.20745	3.48869	6.9783	6.39388	Tumor	BRCA
TCGA-E2-A14Y-01A	2109	0	1.2168	3.55191	3.45867	7.28866	6.31346	Tumor	BRCA
TCGA-AO-A03T-01A	2124	0	0.754166	3.78328	2.95829	5.84289	4.3455	Tumor	BRCA
TCGA-BH-A1EN-01A	2127	1	0.334976	3.2696	2.41314	7.92183	5.62636	Tumor	BRCA
TCGA-E2-A152-01A	2128	0	0.926337	3.76621	4.30762	7.32586	6.37003	Tumor	BRCA
TCGA-BH-A0B5-01A	2136	0	2.70817	2.18543	4.48871	6.82171	5.91643	Tumor	BRCA
TCGA-E2-A1IG-01A	2140	0	0.262907	3.24932	2.73228	7.35765	6.38927	Tumor	BRCA
TCGA-AO-A12E-01A	2142	0	0.282435	2.46669	4.0129	7.61128	6.15989	Tumor	BRCA
TCGA-GM-A2DF-01A	2155	0	1.82738	4.43055	5.04547	7.36378	6.07327	Tumor	BRCA
TCGA-BH-A0DX-01A	2156	0	1.05184	2.9449	5.94784	7.32255	5.85834	Tumor	BRCA
TCGA-AR-A255-01A	2161	0	2.96806	3.68075	4.45412	7.30854	5.72162	Tumor	BRCA
TCGA-B6-A40C-01A	2164	0	1.37081	2.55696	5.27002	6.88419	5.60923	Tumor	BRCA
TCGA-AO-A0JM-01A	2184	0	2.05983	3.75743	3.29213	7.55069	5.48723	Tumor	BRCA
TCGA-A2-A0ES-01A	2190	0	1.48173	3.15801	5.19429	7.85643	5.58125	Tumor	BRCA
TCGA-AO-A0JD-01A	2190	0	2.46014	2.39749	2.99549	7.98063	5.46877	Tumor	BRCA
TCGA-GM-A4E0-01A	2191	0	1.29014	2.78574	6.51673	6.95392	5.70083	Tumor	BRCA
TCGA-BH-A1FN-01A	2192	1	1.27878	3.0842	7.3695	7.43044	5.79773	Tumor	BRCA
TCGA-GM-A2DH-01A	2193	0	4.25911	3.98072	2.05925	7.05367	5.73008	Tumor	BRCA
TCGA-BH-A0BO-01A	2197	0	1.09566	3.6273	7.93927	8.0198	6.31061	Tumor	BRCA
TCGA-BH-A18M-01A	2207	1	1.00228	2.59578	5.32118	7.53593	5.83452	Tumor	BRCA
TCGA-AC-A2BK-01A	2222	0	0.634033	2.28146	5.6086	7.40538	5.37315	Tumor	BRCA
TCGA-AR-A5QM-01A	2231	0	1.6375	2.57845	5.26495	7.42664	6.12391	Tumor	BRCA
TCGA-B6-A1KI-01A	2236	0	0.218864	3.24072	4.5952	7.45556	5.45934	Tumor	BRCA
TCGA-E2-A1L8-01A	2240	0	1.25099	1.528	4.78171	7.32734	4.67442	Tumor	BRCA
TCGA-A2-A04T-01A	2246	0	2.88107	2.97127	3.01289	6.37272	6.64245	Tumor	BRCA
TCGA-AC-A23G-01A	2248	0	0.61624	1.87968	4.61306	7.20701	5.95266	Tumor	BRCA
TCGA-BH-A0BQ-01A	2255	0	0.848106	3.38037	4.08902	7.12696	6.01178	Tumor	BRCA
TCGA-BH-A0BZ-01A	2255	0	2.80638	4.50288	3.3057	7.75545	6.14133	Tumor	BRCA
TCGA-AC-A2FO-01A	2255	0	2.0745	3.731	5.37505	7.59842	5.58427	Tumor	BRCA
TCGA-A2-A0ER-01A	2263	0	0.714914	3.04811	2.09654	7.91531	5.69692	Tumor	BRCA
TCGA-BH-A1FE-06A	2273	1	0.0907899	2.49255	6.77251	7.61358	6.58621	Tumor	BRCA
TCGA-BH-A1FE-01A	2273	1	3.1258	2.65519	1.55984	7.29014	5.7654	Tumor	BRCA
TCGA-BH-A0BL-01A	2278	0	3.38194	3.20811	6.15467	7.60902	6.35838	Tumor	BRCA
TCGA-B6-A402-01A	2281	0	0.272874	2.60229	2.67941	9.14163	6.23963	Tumor	BRCA
TCGA-GM-A2DD-01A	2282	0	2.97483	4.47466	5.89854	6.66764	6.22397	Tumor	BRCA
TCGA-AR-A0TV-01A	2288	0	2.34172	3.77821	0.92442	6.72807	5.92418	Tumor	BRCA
TCGA-A2-A0CT-01A	2289	0	0.206329	1.31152	4.74887	6.84147	5.55983	Tumor	BRCA
TCGA-BH-A0BP-01A	2296	1	0.896834	3.03126	6.534	7.60231	5.39444	Tumor	BRCA
TCGA-E2-A1LB-01A	2306	0	0.653732	3.47455	2.22981	7.54848	5.80311	Tumor	BRCA
TCGA-E2-A14T-01A	2311	0	0.509537	1.22123	5.20568	7.65868	5.86087	Tumor	BRCA
TCGA-E2-A1AZ-01A	2329	0	3.96989	2.89845	4.91625	7.70634	7.30843	Tumor	BRCA
TCGA-BH-A0BR-01A	2330	0	1.75098	1.95309	6.71555	7.65285	6.88945	Tumor	BRCA
TCGA-AO-A0JE-01A	2335	0	3.29893	4.66441	1.36833	7.7614	5.5112	Tumor	BRCA
TCGA-A2-A0CS-01A	2348	1	0.47285	2.32498	1.50101	7.34529	5.7204	Tumor	BRCA
TCGA-B6-A0I1-01A	2361	1	0.132084	3.58268	5.67856	7.61542	6.01104	Tumor	BRCA
TCGA-E2-A1IE-01A	2362	0	0.112661	2.62257	2.60631	7.15079	6.22763	Tumor	BRCA
TCGA-BH-A0BT-01A	2365	0	1.43728	2.80074	2.78991	7.01299	5.37687	Tumor	BRCA
TCGA-BH-A0BW-01A	2371	0	3.92901	4.84628	2.83499	7.83804	6.60407	Tumor	BRCA
TCGA-AO-A12C-01A	2372	0	0.343345	1.93895	2.70456	7.47212	6.1587	Tumor	BRCA
TCGA-BH-A0DE-01A	2372	0	1.28918	2.39881	5.29147	7.58891	5.78214	Tumor	BRCA
TCGA-B6-A0RM-01A	2373	1	0.647672	2.96409	2.23756	7.71774	5.57212	Tumor	BRCA
TCGA-BH-A0DL-01A	2381	0	3.09826	3.47199	4.94667	6.74368	7.02582	Tumor	BRCA
TCGA-AR-A1AJ-01A	2383	0	5.00447	4.36316	4.9281	7.16469	5.2658	Tumor	BRCA
TCGA-A2-A04Q-01A	2385	0	3.4861	4.39584	1.77347	6.39464	6.3361	Tumor	BRCA
TCGA-BH-A0DT-01A	2403	0	1.4968	2.98204	4.03281	7.35603	5.7078	Tumor	BRCA
TCGA-GM-A2DB-01A	2406	0	0.986159	3.50759	6.46929	6.43636	5.39478	Tumor	BRCA
TCGA-B6-A0WV-01A	2417	1	0.308537	2.0081	4.07586	7.78924	5.827	Tumor	BRCA
TCGA-A2-A0EQ-01A	2426	0	3.1355	4.16194	2.05573	6.4696	4.69062	Tumor	BRCA
TCGA-A2-A0EO-01A	2442	0	0.784163	2.00468	3.75802	7.12958	5.39963	Tumor	BRCA
TCGA-AO-A03L-01A	2442	0	1.78842	5.66887	3.53356	6.94963	5.2143	Tumor	BRCA
TCGA-B6-A0RL-01A	2469	1	0.166953	2.99072	1.01732	7.18625	6.4215	Tumor	BRCA
TCGA-BH-A0B0-01A	2477	0	2.21123	3.44592	5.17652	7.30188	5.60598	Tumor	BRCA
TCGA-AO-A03O-01A	2483	1	3.31154	3.58339	2.40052	6.63607	4.33852	Tumor	BRCA
TCGA-BH-A0B6-01A	2483	0	3.2974	4.82189	3.22227	6.581	5.5592	Tumor	BRCA
TCGA-BH-A0DD-01A	2486	0	1.85426	2.87952	1.79814	7.13052	5.61782	Tumor	BRCA
TCGA-BH-A0E9-01B	2489	0	1.06565	2.83718	4.30117	7.44198	5.73701	Tumor	BRCA
TCGA-AO-A1KR-01A	2513	0	0.667878	3.26516	5.80221	6.29132	6.14318	Tumor	BRCA
TCGA-AO-A12D-01A	2515	0	3.07991	3.79631	1.35066	6.488	4.51211	Tumor	BRCA
TCGA-BH-A1ET-01A	2520	1	1.16847	3.20031	2.61713	7.69826	5.4134	Tumor	BRCA
TCGA-BH-A204-01A	2534	1	0.114666	1.33938	1.28682	8.12027	5.33981	Tumor	BRCA
TCGA-GM-A2DC-01A	2535	0	0.537207	1.63548	2.46137	7.91355	5.79564	Tumor	BRCA
TCGA-E2-A106-01A	2541	0	0.265825	2.62111	2.18447	7.08186	5.69559	Tumor	BRCA
TCGA-AR-A0U2-01A	2551	1	2.61339	2.97254	1.80668	7.49983	6.21686	Tumor	BRCA
TCGA-AR-A0TS-01A	2558	0	3.76382	4.01296	4.33596	7.63763	5.88857	Tumor	BRCA
TCGA-BH-A0B7-01A	2559	0	2.01275	3.17345	5.0118	7.06373	5.73999	Tumor	BRCA
TCGA-B6-A0IN-01A	2573	1	1.25439	2.29657	3.73765	6.428	4.4697	Tumor	BRCA
TCGA-GM-A2DI-01A	2590	0	3.66086	4.58815	4.5262	6.83245	5.70003	Tumor	BRCA
TCGA-GM-A2DO-01A	2596	0	3.69428	4.89402	1.06325	6.28164	4.87407	Tumor	BRCA
TCGA-B6-A401-01A	2596	0	1.53097	3.46183	5.21464	6.88207	5.53196	Tumor	BRCA
TCGA-AR-A254-01A	2605	0	2.17329	3.88053	4.48316	7.28175	4.78878	Tumor	BRCA
TCGA-AR-A1AO-01A	2618	0	2.88166	3.18625	4.66456	6.99143	5.72717	Tumor	BRCA
TCGA-AR-A1AX-01A	2629	0	3.87005	4.58922	1.28166	7.16751	5.65079	Tumor	BRCA
TCGA-AR-A1AW-01A	2632	0	4.63227	5.06415	2.01706	6.52527	4.41772	Tumor	BRCA
TCGA-AR-A2LJ-01A	2632	0	1.51089	3.83197	5.53486	6.38414	5.65248	Tumor	BRCA
TCGA-AC-A2FE-01A	2636	1	3.2324	4.63041	5.30812	7.05016	5.85019	Tumor	BRCA
TCGA-PE-A5DE-01A	2645	0	2.46777	4.21085	3.72289	7.10121	5.43822	Tumor	BRCA
TCGA-GM-A2DK-01A	2645	0	0.644312	3.74172	6.57099	7.09184	5.38681	Tumor	BRCA
TCGA-AC-A2FK-01A	2650	0	1.07017	2.86111	5.81941	7.54141	5.8524	Tumor	BRCA
TCGA-E2-A1B1-01A	2653	0	2.87732	3.69458	4.36964	7.97091	5.33815	Tumor	BRCA
TCGA-A2-A04U-01A	2654	0	0.245429	1.39883	3.39039	6.96346	6.7545	Tumor	BRCA
TCGA-A2-A0CQ-01A	2695	0	0.193733	2.51774	2.14976	6.40462	6.07647	Tumor	BRCA
TCGA-AR-A250-01A	2707	0	2.83236	2.62626	2.5758	7.52536	5.31647	Tumor	BRCA
TCGA-BH-A0C3-01A	2709	0	2.19697	2.91788	6.10043	7.22494	5.79187	Tumor	BRCA
TCGA-BH-A1F5-01A	2712	1	0.389054	1.11142	1.70832	7.79146	4.75187	Tumor	BRCA
TCGA-B6-A0RT-01A	2721	0	5.5421	5.40467	4.0156	7.10057	4.89946	Tumor	BRCA
TCGA-AC-A2FF-01A	2759	0	2.24706	2.66994	4.19356	7.35288	5.55356	Tumor	BRCA
TCGA-BH-A18K-01A	2763	1	0.393368	2.09983	3.33068	7.38642	6.06454	Tumor	BRCA
TCGA-BH-A0C7-01B	2767	0	1.06292	3.47492	4.93629	7.69402	5.61892	Tumor	BRCA
TCGA-A2-A3XT-01A	2770	0	1.95993	3.63891	6.11355	7.28	7.09421	Tumor	BRCA
TCGA-BH-A1EO-01A	2798	1	1.83227	1.98828	3.44097	7.9984	5.93901	Tumor	BRCA
TCGA-A2-A0CP-01A	2813	0	0.42113	2.39863	4.62512	7.1611	6.02063	Tumor	BRCA
TCGA-AR-A252-01A	2838	0	3.98764	3.00495	3.43946	7.31997	4.697	Tumor	BRCA
TCGA-AR-A256-01A	2854	1	1.93688	3.34486	4.70675	7.6696	6.08077	Tumor	BRCA
TCGA-AR-A1AP-01A	2856	0	1.54277	2.90237	5.16292	7.64045	6.23452	Tumor	BRCA
TCGA-AR-A24L-01A	2866	1	0.410005	3.36239	2.12886	7.46934	5.95487	Tumor	BRCA
TCGA-AR-A1AU-01A	2868	0	0.576391	2.85471	4.80302	7.40453	6.19279	Tumor	BRCA
TCGA-AO-A03P-01A	2911	1	0.682223	4.42938	0.645035	7.32335	5.46954	Tumor	BRCA
TCGA-AR-A1AN-01A	2920	0	0.467746	2.67835	5.55679	7.32726	6.02946	Tumor	BRCA
TCGA-AO-A1KP-01A	2953	0	0.349193	1.13277	1.30883	7.26345	5.1942	Tumor	BRCA
TCGA-B6-A0IH-01A	2965	1	1.45451	2.38506	4.61586	7.31186	5.90345	Tumor	BRCA
TCGA-BH-A1F6-01A	2965	1	2.0432	3.82588	5.66707	8.18424	5.80676	Tumor	BRCA
TCGA-B6-A0WS-01A	2965	1	3.05754	4.31845	2.89643	7.56061	5.56518	Tumor	BRCA
TCGA-AR-A1AL-01A	2971	0	1.09311	2.11068	4.44066	7.82519	5.78709	Tumor	BRCA
TCGA-AR-A24S-01A	2976	0	2.41417	2.93943	4.60885	6.90524	6.06392	Tumor	BRCA
TCGA-AO-A12B-01A	2989	0	0.255194	3.68872	2.61572	7.51385	5.29133	Tumor	BRCA
TCGA-AR-A0TQ-01A	2991	0	2.49647	4.82346	3.80733	7.14788	6.10104	Tumor	BRCA
TCGA-AR-A1AM-01A	2991	0	1.68032	3.25826	4.15196	7.32607	6.18922	Tumor	BRCA
TCGA-AR-A24Z-01A	3001	0	1.2311	3.13036	2.49584	7.11863	6.12476	Tumor	BRCA
TCGA-AR-A24X-01A	3004	0	1.61837	2.51129	3.05111	7.40055	5.23173	Tumor	BRCA
TCGA-AR-A0TW-01A	3009	0	1.9671	3.09077	2.01534	8.41901	5.53983	Tumor	BRCA
TCGA-A2-A0CV-01A	3011	0	1.63697	2.63421	2.9501	7.78321	5.67927	Tumor	BRCA
TCGA-A2-A0CL-01A	3015	0	5.30338	5.6073	5.10359	7.42204	5.76019	Tumor	BRCA
TCGA-A2-A0ST-01A	3017	0	4.3026	4.83111	2.36404	6.61963	5.49021	Tumor	BRCA
TCGA-AR-A1AQ-01A	3021	0	3.14774	3.68665	2.9658	6.73713	6.33772	Tumor	BRCA
TCGA-AC-A2BM-01A	3022	0	2.64906	4.13196	1.24158	7.6397	5.36365	Tumor	BRCA
TCGA-AR-A251-01A	3030	0	2.04211	3.81814	4.42368	8.60965	5.20373	Tumor	BRCA
TCGA-AR-A24N-01A	3035	0	1.12092	2.2113	3.57175	7.37114	4.90946	Tumor	BRCA
TCGA-B6-A0RS-01A	3063	1	2.42776	3.68772	6.46796	7.41541	6.48994	Tumor	BRCA
TCGA-B6-A1KF-01A	3088	0	0.0351553	2.0791	3.76742	7.63494	4.48688	Tumor	BRCA
TCGA-GM-A2DN-01A	3091	0	2.58915	4.248	3.33778	6.83988	5.52964	Tumor	BRCA
TCGA-A2-A0EM-01A	3094	0	0.366959	2.26352	2.46854	6.9581	5.83292	Tumor	BRCA
TCGA-A2-A04W-01A	3102	0	0.677926	2.25676	3.51405	7.23622	6.83409	Tumor	BRCA
TCGA-AO-A12A-01A	3112	0	1.2093	2.8542	4.13985	7.50473	5.94522	Tumor	BRCA
TCGA-E2-A1LI-01A	3121	0	2.04511	3.03952	2.61086	8.33037	5.84337	Tumor	BRCA
TCGA-B6-A0RP-01A	3126	1	0.979168	2.78878	3.13322	7.45674	5.84313	Tumor	BRCA
TCGA-AR-A24U-01A	3128	0	3.57517	3.63328	3.80957	7.6376	5.25277	Tumor	BRCA
TCGA-B6-A40B-01A	3152	0	1.18301	3.28901	4.90895	6.87141	6.61034	Tumor	BRCA
TCGA-AR-A1AK-01A	3159	0	2.79972	4.0955	3.57513	7.37388	6.19276	Tumor	BRCA
TCGA-AR-A24Q-01A	3172	0	1.84087	2.79654	2.44904	7.52879	6.29769	Tumor	BRCA
TCGA-AR-A24T-01A	3202	0	0.637858	2.93041	3.15643	7.45177	5.58568	Tumor	BRCA
TCGA-AR-A24V-01A	3203	0	1.26217	3.61065	4.21164	7.70205	5.91514	Tumor	BRCA
TCGA-A2-A25E-01A	3204	0	1.96449	2.33593	2.17635	7.96265	5.66428	Tumor	BRCA
TCGA-GM-A2DM-01A	3226	0	0.141182	3.87428	4.84391	7.2763	6.20044	Tumor	BRCA
TCGA-E2-A1LH-01A	3247	0	2.17684	5.30562	4.71736	6.78344	5.98083	Tumor	BRCA
TCGA-AO-A128-01A	3248	0	4.61593	5.02046	4.29061	7.55743	5.15627	Tumor	BRCA
TCGA-Z7-A8R6-01A	3256	0	1.11983	2.6368	5.25804	6.59104	5.7879	Tumor	BRCA
TCGA-AR-A0U4-01A	3261	0	2.58943	2.96307	5.90162	7.69654	7.1575	Tumor	BRCA
TCGA-AR-A0TZ-01A	3262	1	0.714566	2.92787	1.69157	7.40817	5.02902	Tumor	BRCA
TCGA-A2-A25A-01A	3276	0	1.77297	2.53921	2.91025	7.56478	5.57863	Tumor	BRCA
TCGA-A2-A0CW-01A	3283	0	1.69233	3.53539	2.07173	8.80849	6.58017	Tumor	BRCA
TCGA-A2-A0CR-01A	3283	0	3.35111	4.73677	4.07045	6.40312	5.14316	Tumor	BRCA
TCGA-AO-A129-01A	3286	0	2.42412	3.92233	5.60449	6.63832	7.49474	Tumor	BRCA
TCGA-Z7-A8R5-01A	3287	0	1.25048	2.76849	4.86175	6.82094	5.93433	Tumor	BRCA
TCGA-AR-A1AI-01A	3296	0	3.29017	2.89639	3.90958	7.36616	5.43317	Tumor	BRCA
TCGA-AO-A126-01A	3307	0	0.725177	2.8588	1.38445	6.95509	5.97443	Tumor	BRCA
TCGA-AR-A0TT-01A	3316	0	3.6414	3.51147	3.00745	7.14947	5.17682	Tumor	BRCA
TCGA-GI-A2C9-01A	3342	0	1.55	3.73638	4.86413	7.61949	7.53919	Tumor	BRCA
TCGA-GM-A3NW-01A	3361	0	0.742245	4.22753	3.82747	7.35196	5.54098	Tumor	BRCA
TCGA-BH-A42U-01A	3364	0	1.47953	3.87448	7.20107	7.58761	5.74221	Tumor	BRCA
TCGA-A8-A08T-01A	3409	1	0.79736	3.00311	4.86792	6.86272	5.90812	Tumor	BRCA
TCGA-AR-A24R-01A	3430	0	2.94708	1.99276	3.95851	7.24805	5.27672	Tumor	BRCA
TCGA-AO-A125-01A	3456	0	0	1.8048	3.987	7.22018	5.30887	Tumor	BRCA
TCGA-B6-A0WY-01A	3461	1	1.48684	3.98628	2.24817	7.2587	6.37225	Tumor	BRCA
TCGA-BH-A1ES-01A	3462	1	0.516198	2.30791	1.43443	7.76867	5.8187	Tumor	BRCA
TCGA-BH-A1ES-06A	3462	1	0.0835279	3.73156	8.84755	7.41766	6.76709	Tumor	BRCA
TCGA-BH-A1FC-01A	3472	1	3.22755	3.35768	1.87964	6.96608	5.47243	Tumor	BRCA
TCGA-AO-A124-01A	3506	0	1.62879	3.45287	4.67519	7.83181	5.77549	Tumor	BRCA
TCGA-GM-A2DL-01A	3519	0	1.10593	3.17001	4.29436	7.95496	5.77937	Tumor	BRCA
TCGA-A2-A0EP-01A	3603	0	4.5568	3.53346	5.51987	7.00238	5.71802	Tumor	BRCA
TCGA-AR-A24O-01A	3607	0	2.17886	2.43178	4.61248	7.58514	5.29212	Tumor	BRCA
TCGA-AR-A24M-01A	3660	0	0.217476	1.95004	1.81708	7.40242	5.02163	Tumor	BRCA
TCGA-BH-A1FB-01A	3669	1	3.3408	2.94276	2.76213	7.66563	5.18549	Tumor	BRCA
TCGA-A2-A04R-01A	3709	0	0.119752	2.71655	3.48138	7.0514	6.21858	Tumor	BRCA
TCGA-AR-A1AH-01A	3807	0	0.475441	1.12487	3.28001	7.47202	6.74655	Tumor	BRCA
TCGA-B6-A0IM-01A	3873	1	0.609078	3.37636	4.26109	7.03173	6.25852	Tumor	BRCA
TCGA-B6-A0IP-01A	3926	1	0.995235	2.43831	3.37045	6.97588	5.9979	Tumor	BRCA
TCGA-B6-A0IB-01A	3941	1	0.160609	1.9947	5.50312	7.09023	5.59739	Tumor	BRCA
TCGA-B6-A0X0-01A	3945	1	0.400056	3.13849	2.41737	6.8418	5.82923	Tumor	BRCA
TCGA-AQ-A04L-01B	3957	0	0.645975	3.57477	2.19889	7.25282	6.75973	Tumor	BRCA
TCGA-BH-A209-01A	3959	1	4.03662	4.17347	3.2228	7.51072	5.5382	Tumor	BRCA
TCGA-3C-AALI-01A	4005	0	2.08536	3.88381	6.04415	7.43706	5.30429	Tumor	BRCA
TCGA-3C-AAAU-01A	4047	0	0.159674	3.20532	1.97945	6.99481	6.49427	Tumor	BRCA
TCGA-AR-A0U3-01A	4080	0	1.53477	2.98395	1.90688	6.3394	6.28167	Tumor	BRCA
TCGA-A2-A0EN-01A	4088	0	2.6853	2.88365	5.26434	7.24683	5.56099	Tumor	BRCA
TCGA-A2-A0CK-01A	4159	0	0.84645	2.61939	5.81518	6.91649	6.13838	Tumor	BRCA
TCGA-B6-A1KN-01A	4233	0	1.88797	4.33601	2.26438	7.62065	5.14017	Tumor	BRCA
TCGA-B6-A0RQ-01A	4267	1	0.255752	2.36726	3.59442	7.92355	5.92885	Tumor	BRCA
TCGA-AR-A0TP-01A	4275	0	0.0581684	0.94391	6.66928	7.10428	5.36859	Tumor	BRCA
TCGA-B6-A0IQ-01A	4285	0	1.51526	2.40746	3.88919	7.08584	6.07439	Tumor	BRCA
TCGA-A2-A04N-01A	4354	0	0.608957	2.10067	2.15549	7.28695	5.63598	Tumor	BRCA
TCGA-B6-A0I2-01A	4361	0	2.18023	3.61812	2.54098	6.55526	6.71293	Tumor	BRCA
TCGA-B6-A0IG-01A	4456	1	1.43281	4.3422	4.9118	7.11192	5.07463	Tumor	BRCA
TCGA-AR-A24H-01A	4894	0	2.58208	2.74791	3.07692	7.72627	6.58862	Tumor	BRCA
TCGA-B6-A0RO-01A	4929	0	0.367912	2.31793	4.22391	7.2299	5.88384	Tumor	BRCA
TCGA-B6-A0IO-01A	5042	0	1.07406	4.78679	2.31615	6.97335	6.62097	Tumor	BRCA
TCGA-AR-A2LE-01A	5062	0	0.664215	1.9303	4.26767	6.50256	5.78851	Tumor	BRCA
TCGA-B6-A0RV-01A	5156	0	2.12117	3.65781	2.49911	7.41734	5.21155	Tumor	BRCA
TCGA-B6-A2IU-01A	5176	0	0.342985	1.81009	4.87119	7.10952	5.34341	Tumor	BRCA
TCGA-B6-A0WT-01A	5739	0	1.46384	3.88561	1.22123	7.12784	5.68261	Tumor	BRCA
TCGA-B6-A0WZ-01A	6292	0	0.331211	2.52877	3.77314	7.551	5.48176	Tumor	BRCA
TCGA-B6-A0RH-01A	6456	1	1.14122	4.43344	4.56505	6.91882	5.78227	Tumor	BRCA
TCGA-GM-A2DA-01A	6593	1	2.37704	2.41852	3.74953	6.66509	5.32873	Tumor	BRCA
TCGA-B6-A0IJ-01A	7106	0	2.54684	3.64972	1.65452	7.08929	6.39691	Tumor	BRCA
TCGA-B6-A0RI-01A	7126	0	0.582532	2.49733	3.81684	7.54126	5.7812	Tumor	BRCA
TCGA-B6-A0X1-01A	7455	1	3.55168	4.82168	4.24283	8.18273	8.23166	Tumor	BRCA
TCGA-B6-A0RE-01A	7777	0	1.2647	2.98899	4.98449	7.70596	7.59699	Tumor	BRCA
TCGA-B6-A0RN-01A	8008	0	0.272101	1.48963	1.902	7.13576	5.36774	Tumor	BRCA
TCGA-B6-A0IA-01A	8391	0	0.0227514	3.75967	4.56774	7.18154	5.4069	Tumor	BRCA
TCGA-B6-A0I5-01A	8556	0	0.28416	3.64341	3.31054	6.78909	5.69479	Tumor	BRCA
TCGA-B6-A0RU-01A	8605	0	0.916169	1.91357	6.2835	7.34395	5.1724	Tumor	BRCA
TCGA-EK-A2RO-01A	2	0	1.16722	4.61513	5.83718	6.7366	5.75092	Tumor	CESC
TCGA-EK-A3GJ-01A	3	0	2.73071	5.09036	6.37175	7.45636	6.1465	Tumor	CESC
TCGA-EK-A2R9-01A	4	0	2.33868	3.06368	3.68857	6.17981	6.23504	Tumor	CESC
TCGA-ZJ-AAXU-01A	5	0	2.49391	4.46443	6.67301	6.3397	7.35843	Tumor	CESC
TCGA-LP-A5U2-01A	9	0	1.57068	3.36796	0.787325	7.54811	6.25102	Tumor	CESC
TCGA-EK-A2RB-01A	9	0	0.581612	3.14119	5.59046	6.79822	6.1765	Tumor	CESC
TCGA-EA-A97N-01A	11	0	1.12576	3.28333	5.07548	6.70267	6.15533	Tumor	CESC
TCGA-EK-A2PK-01A	12	0	2.47233	3.56694	3.16496	7.66363	6.43494	Tumor	CESC
TCGA-EK-A2PL-01A	13	0	1.10097	3.15306	6.19801	7.18434	6.2305	Tumor	CESC
TCGA-EK-A2RK-01A	13	0	1.47115	3.30614	3.80588	7.09027	5.11463	Tumor	CESC
TCGA-C5-A1MJ-01A	14	1	1.59117	2.03439	3.20162	6.9888	6.07662	Tumor	CESC
TCGA-EK-A3GK-01A	15	0	1.41102	2.74526	4.17687	7.04455	6.40023	Tumor	CESC
TCGA-EK-A2PM-01A	18	0	0.528714	0.679399	5.15377	7.98864	5.80582	Tumor	CESC
TCGA-ZJ-AAX4-01A	21	0	2.17771	3.57084	3.04593	6.67488	6.06758	Tumor	CESC
TCGA-LP-A5U3-01A	25	0	2.0711	5.38981	5.90501	7.51903	5.81122	Tumor	CESC
TCGA-EK-A2R7-01A	27	0	2.07203	3.2031	1.66468	6.16785	5.42545	Tumor	CESC
TCGA-LP-A4AW-01A	27	0	1.24988	2.91656	5.43758	8.23479	6.83996	Tumor	CESC
TCGA-EK-A3GN-01A	27	0	0.0207003	1.22614	4.2115	6.43424	4.82765	Tumor	CESC
TCGA-FU-A770-01A	34	0	1.61181	5.87597	1.18368	6.95888	6.37616	Tumor	CESC
TCGA-DG-A2KH-01A	34	0	0.482342	3.58205	3.11259	6.82442	6.01198	Tumor	CESC
TCGA-ZJ-AAXA-01A	43	0	0.377645	2.49988	3.17561	7.50712	5.79043	Tumor	CESC
TCGA-EK-A2R8-01A	44	0	0.705466	3.74411	8.78137	7.70606	7.48809	Tumor	CESC
TCGA-FU-A3TX-01A	45	0	1.84536	2.99113	4.95199	7.01148	6.93957	Tumor	CESC
TCGA-EK-A2PG-01A	46	0	0.805948	1.60292	6.54201	7.59505	5.69308	Tumor	CESC
TCGA-EK-A2RM-01A	50	0	0.681366	4.23364	6.26681	6.57132	6.89193	Tumor	CESC
TCGA-VS-A9UJ-01A	52	1	0.223535	3.77483	7.35414	6.83121	6.93472	Tumor	CESC
TCGA-EK-A2RJ-01A	53	0	1.92338	3.02046	7.89673	7.89002	6.30684	Tumor	CESC
TCGA-EK-A2RE-01A	57	0	0.658314	3.16812	6.20743	6.6202	5.90996	Tumor	CESC
TCGA-EK-A2RN-01A	71	0	0.767174	2.57065	3.94152	5.32954	4.99125	Tumor	CESC
TCGA-C5-A1MK-01A	74	1	1.45523	3.93509	7.89456	7.3676	5.61228	Tumor	CESC
TCGA-C5-A7X8-01A	83	0	0.846927	3.26061	2.26859	6.12166	5.69824	Tumor	CESC
TCGA-PN-A8MA-01A	90	0	1.94789	2.83067	1.6509	6.38434	5.82994	Tumor	CESC
TCGA-JW-A5VH-01A	100	1	0.269475	3.50304	4.41641	6.65439	5.31604	Tumor	CESC
TCGA-VS-A9UV-01A	104	1	0.352214	2.57692	4.61907	7.81436	6.0818	Tumor	CESC
TCGA-C5-A1MP-01A	109	0	2.18417	3.73613	3.82368	6.98372	5.87066	Tumor	CESC
TCGA-ZX-AA5X-01A	119	0	1.83651	4.19772	5.76491	6.84185	6.07725	Tumor	CESC
TCGA-EK-A2RC-01A	129	0	1.81988	4.51952	5.34929	7.0561	5.72151	Tumor	CESC
TCGA-VS-A9V4-01A	132	1	0.746781	1.66665	3.78659	7.60297	5.73002	Tumor	CESC
TCGA-VS-A94Y-01A	144	1	0.71006	5.1193	9.19557	7.60588	7.61168	Tumor	CESC
TCGA-C5-A902-01A	149	0	2.13867	5.03725	6.61096	6.075	6.13305	Tumor	CESC
TCGA-VS-A9V1-01A	157	1	0.468925	4.41808	3.54124	6.67577	6.90741	Tumor	CESC
TCGA-C5-A1BN-01B	166	1	0.226236	2.94223	5.71353	10.1542	5.74903	Tumor	CESC
TCGA-EK-A2IP-01A	202	0	0.3868	4.10263	4.63386	6.80447	6.75676	Tumor	CESC
TCGA-EA-A50E-01A	227	1	1.2911	2.26446	6.23829	8.25879	5.82783	Tumor	CESC
TCGA-EX-A1H6-01B	241	0	0.393911	4.51598	3.7157	6.35565	6.33851	Tumor	CESC
TCGA-DS-A7WI-01A	252	1	0.590033	2.70057	5.81261	7.0591	6.52734	Tumor	CESC
TCGA-JW-A852-01A	252	1	1.37718	5.45694	7.81709	5.12455	5.78194	Tumor	CESC
TCGA-EX-A69M-01A	253	1	2.02454	4.08415	7.73435	6.42849	5.85692	Tumor	CESC
TCGA-C5-A8XI-01A	254	0	2.67945	5.37872	5.99174	6.90927	6.39208	Tumor	CESC
TCGA-MA-AA42-01A	259	0	4.48033	4.87055	7.42691	6.60134	5.94472	Tumor	CESC
TCGA-DS-A1O9-01A	266	1	2.51679	4.50398	5.7828	7.56614	6.23915	Tumor	CESC
TCGA-Q1-A6DT-01A	275	1	1.11633	2.38224	4.9106	7.21219	4.84372	Tumor	CESC
TCGA-MA-AA41-01A	279	0	1.20888	3.16257	6.33445	7.35847	6.79336	Tumor	CESC
TCGA-Q1-A73Q-01A	284	0	1.7663	4.47311	3.80969	6.98637	5.54808	Tumor	CESC
TCGA-C5-A7X3-01A	284	1	1.68536	4.51745	2.5169	7.35655	7.32022	Tumor	CESC
TCGA-HM-A6W2-06A	287	0	0.100978	1.47717	7.96965	6.40904	4.59826	Tumor	CESC
TCGA-HM-A6W2-01A	287	0	1.18732	2.35191	3.5538	5.87399	4.83307	Tumor	CESC
TCGA-VS-A8EB-01A	305	1	1.60961	2.4203	6.64545	6.97133	7.92914	Tumor	CESC
TCGA-FU-A5XV-01A	321	0	1.44315	3.06244	5.92729	7.5128	6.47514	Tumor	CESC
TCGA-LP-A4AU-01A	343	0	1.13673	5.33901	6.40238	7.22676	5.97601	Tumor	CESC
TCGA-MA-AA43-01A	346	0	1.1414	2.85986	8.09804	6.88449	5.529	Tumor	CESC
TCGA-C5-A0TN-01A	348	1	1.94463	4.57537	7.89832	7.01126	6.64044	Tumor	CESC
TCGA-VS-A8QC-01A	350	1	1.04593	3.77015	5.79116	6.8118	5.96448	Tumor	CESC
TCGA-UC-A7PD-01A	355	1	1.45507	4.1093	6.53279	7.8273	6.46747	Tumor	CESC
TCGA-EA-A44S-01A	369	0	1.82726	3.89596	6.12112	7.39234	5.78198	Tumor	CESC
TCGA-UC-A7PG-06A	370	1	1.87567	3.03635	2.72747	7.1389	6.08532	Tumor	CESC
TCGA-UC-A7PG-01A	370	1	1.31312	1.99758	5.28885	7.29632	5.95432	Tumor	CESC
TCGA-FU-A23K-01A	372	0	3.31695	4.23352	2.17061	5.99231	4.94103	Tumor	CESC
TCGA-DS-A1OC-01A	376	0	2.17455	3.07905	7.95032	7.5685	5.73	Tumor	CESC
TCGA-LP-A4AX-01A	380	0	3.12401	4.87041	4.78998	8.07986	5.46991	Tumor	CESC
TCGA-EK-A2GZ-01A	383	0	1.55918	2.16304	5.14024	6.93561	6.24668	Tumor	CESC
TCGA-EA-A3QD-01A	397	0	3.59615	5.10325	1.77339	6.99799	5.4649	Tumor	CESC
TCGA-LP-A7HU-01A	406	0	2.41523	3.62211	1.20902	6.00737	5.64619	Tumor	CESC
TCGA-EA-A78R-01A	410	0	2.5294	5.68485	6.2175	6.86174	5.46436	Tumor	CESC
TCGA-C5-A7X5-01A	414	1	0.755719	4.54804	5.10408	7.35865	7.08395	Tumor	CESC
TCGA-FU-A40J-01A	426	0	0.948575	3.91196	1.39213	5.81551	4.91783	Tumor	CESC
TCGA-Q1-A73O-01A	428	0	2.23045	3.57185	7.66675	7.02416	6.94101	Tumor	CESC
TCGA-VS-A9UL-01A	442	1	0.147631	2.18935	1.5238	6.49042	5.84207	Tumor	CESC
TCGA-VS-A9UU-01A	442	0	1.14594	3.66655	5.00096	6.47682	5.52651	Tumor	CESC
TCGA-RA-A741-01A	444	0	2.14261	4.64755	4.18905	6.66448	6.32091	Tumor	CESC
TCGA-EX-A449-01A	447	0	0.467837	5.17616	2.93708	6.57806	6.38837	Tumor	CESC
TCGA-C5-A907-01A	448	0	1.29114	4.88583	4.54528	7.59334	6.67783	Tumor	CESC
TCGA-EA-A556-01A	453	0	0.768172	3.95592	2.6491	7.1708	5.91627	Tumor	CESC
TCGA-HM-A4S6-01A	454	0	2.2338	3.56567	6.33827	6.64875	6.48166	Tumor	CESC
TCGA-EX-A3L1-01A	463	0	1.48748	4.10193	8.25232	7.5905	6.42204	Tumor	CESC
TCGA-VS-AA62-01A	469	1	3.23541	4.58613	6.14525	7.61968	6.30462	Tumor	CESC
TCGA-C5-A7CL-01A	471	1	1.86138	4.52431	7.73184	6.97555	5.65007	Tumor	CESC
TCGA-EX-A8YF-01A	473	0	1.98134	4.91982	1.75475	7.29796	5.80914	Tumor	CESC
TCGA-Q1-A5R1-01A	474	0	1.80902	4.26958	4.37667	6.6228	6.1965	Tumor	CESC
TCGA-JW-A5VL-01A	474	0	2.46405	5.18626	6.22745	7.40317	6.33086	Tumor	CESC
TCGA-VS-A953-01A	477	1	0.814253	2.26097	4.40067	7.27368	6.73068	Tumor	CESC
TCGA-VS-A9UT-01A	482	0	3.33031	4.11211	2.09578	6.11347	3.77743	Tumor	CESC
TCGA-Q1-A73P-01A	483	0	1.6217	4.89963	2.61636	6.72173	6.01928	Tumor	CESC
TCGA-Q1-A5R3-01A	485	0	2.42334	5.43516	7.68302	5.01461	5.4321	Tumor	CESC
TCGA-FU-A3EO-01A	490	0	0.635819	6.94728	4.64479	5.9063	5.87627	Tumor	CESC
TCGA-Q1-A6DV-01A	491	0	1.23366	3.56113	1.49887	6.84418	6.07189	Tumor	CESC
TCGA-FU-A3WB-01A	491	0	0.911941	4.29294	4.15058	6.96166	6.29444	Tumor	CESC
TCGA-DS-A7WF-01A	492	1	1.49744	4.41504	1.92281	6.76626	6.54596	Tumor	CESC
TCGA-VS-A9V5-01A	494	1	0.52296	4.33939	2.3541	6.16364	5.11495	Tumor	CESC
TCGA-Q1-A5R2-01A	499	0	1.76209	5.13954	6.01297	6.8351	5.88548	Tumor	CESC
TCGA-VS-A94X-01A	506	1	2.47986	3.30918	5.13211	7.19785	7.12972	Tumor	CESC
TCGA-DS-A5RQ-01A	512	0	1.45698	4.26974	3.57471	7.32801	5.63798	Tumor	CESC
TCGA-C5-A901-01A	518	0	1.54988	4.05446	5.1067	7.11449	5.81049	Tumor	CESC
TCGA-C5-A7UC-01A	523	1	0.756256	3.30138	7.61566	8.53123	7.04416	Tumor	CESC
TCGA-MY-A913-01A	524	0	3.3395	5.97628	6.52038	7.5113	5.96436	Tumor	CESC
TCGA-DS-A7WH-01A	533	0	2.06937	4.73839	7.64901	6.78827	6.74924	Tumor	CESC
TCGA-2W-A8YY-01A	533	0	0.757052	1.94199	5.36454	6.63805	6.61031	Tumor	CESC
TCGA-Q1-A6DW-01A	534	0	1.44526	4.04671	5.68215	7.9917	6.54692	Tumor	CESC
TCGA-VS-A9V3-01A	540	0	2.64222	4.54802	5.2858	7.26036	6.11148	Tumor	CESC
TCGA-GH-A9DA-01A	540	0	1.82435	4.67256	8.75245	7.61784	7.92042	Tumor	CESC
TCGA-MA-AA3Y-01A	542	0	3.18863	4.11127	6.66673	7.67793	6.50284	Tumor	CESC
TCGA-4J-AA1J-01A	542	0	1.0402	3.91703	5.33762	7.36857	6.41215	Tumor	CESC
TCGA-C5-A3HF-01A	543	1	2.04569	3.27976	3.53671	6.97337	5.96807	Tumor	CESC
TCGA-C5-A3HE-01A	548	0	1.52375	3.88472	2.33544	6.78164	6.92435	Tumor	CESC
TCGA-JW-AAVH-01A	552	0	0.717075	4.25859	6.07479	7.07428	6.14347	Tumor	CESC
TCGA-VS-A9UY-01A	555	1	2.02137	4.17074	5.0826	7.04546	6.09237	Tumor	CESC
TCGA-VS-A9V2-01A	555	0	2.53154	2.90843	5.0822	6.97226	4.99345	Tumor	CESC
TCGA-Q1-A73R-01A	567	0	1.22715	3.12573	2.63367	6.5712	5.94856	Tumor	CESC
TCGA-C5-A1BF-01B	570	1	1.31287	3.20832	7.4436	6.73728	6.25241	Tumor	CESC
TCGA-VS-A9V0-01A	573	0	0.250363	2.46354	6.36786	6.8934	6.58107	Tumor	CESC
TCGA-FU-A2QG-01A	579	0	1.03532	3.22908	4.70739	6.55368	5.34087	Tumor	CESC
TCGA-ZJ-A8QR-01A	582	1	0.494651	3.81418	3.33212	6.63076	7.06564	Tumor	CESC
TCGA-EK-A2PI-01A	586	0	0.942916	4.02372	3.29967	6.51598	6.22292	Tumor	CESC
TCGA-MA-AA3Z-01A	595	0	2.1969	4.73741	5.22948	7.5063	6.50145	Tumor	CESC
TCGA-R2-A69V-01A	596	0	3.58566	5.11729	6.64809	7.58129	5.52319	Tumor	CESC
TCGA-EX-A69L-01A	602	0	3.0623	5.20383	3.55833	7.10321	6.70013	Tumor	CESC
TCGA-C5-A1BQ-01C	604	1	1.61325	4.35189	8.36631	7.08185	6.26606	Tumor	CESC
TCGA-MU-A8JM-01A	607	0	2.13355	3.68651	8.35676	7.43882	7.14575	Tumor	CESC
TCGA-VS-A8EJ-01A	607	1	1.04208	2.60771	1.9527	6.06085	5.48626	Tumor	CESC
TCGA-MA-AA3X-01A	617	0	0.757492	3.32272	4.17469	6.94263	5.47983	Tumor	CESC
TCGA-C5-A7CM-01A	619	0	0.226629	4.88177	5.05695	5.65685	6.10095	Tumor	CESC
TCGA-EX-A1H5-01A	619	0	1.39725	4.2745	5.83813	6.24636	6.81065	Tumor	CESC
TCGA-C5-A3HL-01A	621	0	1.13862	3.43774	7.14078	6.99866	6.30759	Tumor	CESC
TCGA-JW-A5VK-01A	623	0	0.889575	4.04088	7.68242	6.63004	6.27126	Tumor	CESC
TCGA-HM-A3JK-01A	632	0	1.01076	3.21567	6.46896	6.37764	6.16419	Tumor	CESC
TCGA-C5-A8YT-01A	633	1	0.415244	2.10105	2.75892	6.41207	6.39507	Tumor	CESC
TCGA-MY-A5BF-01A	634	0	2.06031	5.06688	8.70075	6.59593	5.8913	Tumor	CESC
TCGA-JX-A5QV-01A	636	0	1.78724	4.9943	5.08248	6.72997	6.71094	Tumor	CESC
TCGA-C5-A1ML-01A	636	1	2.32874	2.82186	4.58831	7.13232	6.3134	Tumor	CESC
TCGA-C5-A8ZZ-01A	636	0	1.43466	3.86713	2.70684	7.32032	6.14822	Tumor	CESC
TCGA-FU-A3NI-01A	638	1	1.20637	2.76838	3.9519	8.71942	6.40257	Tumor	CESC
TCGA-JX-A3PZ-01A	642	1	1.05308	4.0266	6.37304	7.90374	5.74784	Tumor	CESC
TCGA-JW-A5VJ-01A	652	0	1.03063	2.77638	6.78188	7.69514	5.65136	Tumor	CESC
TCGA-HM-A3JJ-01A	659	1	1.97791	3.98558	5.1472	6.93626	6.76669	Tumor	CESC
TCGA-MA-AA3W-01A	685	0	3.49056	5.0523	4.92992	7.0268	6.32771	Tumor	CESC
TCGA-Q1-A73S-01A	688	0	0.323277	2.90619	5.89688	7.23083	6.48473	Tumor	CESC
TCGA-DS-A3LQ-01A	699	0	1.26131	3.94055	2.48517	6.79039	6.41576	Tumor	CESC
TCGA-C5-A8YQ-01A	715	1	0.426201	2.54997	3.72342	6.77396	8.00256	Tumor	CESC
TCGA-BI-A20A-01A	720	0	2.37638	4.05131	2.17146	6.47846	6.42928	Tumor	CESC
TCGA-FU-A23L-01A	725	0	2.28675	4.32988	3.40326	7.08776	6.37691	Tumor	CESC
TCGA-VS-A8EI-01A	729	0	2.63118	4.82962	4.28267	7.35736	6.74322	Tumor	CESC
TCGA-EA-A6QX-01A	730	0	2.56528	5.95131	6.95744	6.72674	5.77699	Tumor	CESC
TCGA-VS-A9UD-01A	739	0	3.32444	5.93904	0.725158	6.20943	5.43424	Tumor	CESC
TCGA-JW-A5VI-01A	747	0	2.27596	3.85407	5.77288	8.44708	6.95947	Tumor	CESC
TCGA-EA-A411-01A	747	0	1.36879	2.78633	5.38567	7.19558	5.66519	Tumor	CESC
TCGA-EA-A4BA-01A	755	0	0.200823	3.51993	6.47256	6.48376	5.41919	Tumor	CESC
TCGA-EA-A3QE-01A	761	0	3.16508	4.80263	7.1674	6.96944	5.47194	Tumor	CESC
TCGA-HG-A2PA-01A	773	1	1.76248	4.25179	4.47913	7.28997	6.38633	Tumor	CESC
TCGA-EA-A5O9-01A	788	0	1.07737	4.84755	4.71125	6.98182	6.6801	Tumor	CESC
TCGA-EA-A43B-01A	791	0	1.80815	5.18563	8.30666	7.17771	5.29905	Tumor	CESC
TCGA-WL-A834-01A	791	0	1.01024	2.04732	5.23954	7.07161	7.14482	Tumor	CESC
TCGA-VS-A9UR-01A	793	0	0.801812	4.19911	6.49191	7.01133	4.6343	Tumor	CESC
TCGA-FU-A3TQ-01A	795	0	1.7502	4.3569	4.85752	6.85352	5.69177	Tumor	CESC
TCGA-EK-A2H1-01A	799	0	2.40334	5.41222	8.32017	6.89883	6.49073	Tumor	CESC
TCGA-EA-A410-01A	803	0	0.9628	2.56946	4.21069	6.3188	3.52952	Tumor	CESC
TCGA-EA-A5FO-01A	815	0	0.554445	3.84682	5.46748	6.75118	5.57821	Tumor	CESC
TCGA-VS-A9UC-01A	825	0	1.26336	3.58375	3.58865	6.68409	5.36245	Tumor	CESC
TCGA-EA-A5ZF-01A	828	0	0.435186	2.42187	2.86058	6.45572	6.00848	Tumor	CESC
TCGA-VS-A9UM-01A	829	1	2.4797	3.49052	5.87198	6.94597	6.01376	Tumor	CESC
TCGA-EA-A5ZE-01A	829	0	1.96553	3.45528	3.5461	6.91507	6.0145	Tumor	CESC
TCGA-VS-A8EK-01A	829	1	1.42981	2.80668	5.02849	7.09153	6.87968	Tumor	CESC
TCGA-EA-A5ZD-01A	830	0	3.00106	3.59201	7.03942	6.99229	6.59888	Tumor	CESC
TCGA-JW-A5VG-01A	834	0	1.75771	5.96924	3.60793	6.711	6.0457	Tumor	CESC
TCGA-C5-A8YR-01A	837	1	1.80257	3.28782	7.53818	7.01359	6.69675	Tumor	CESC
TCGA-MU-A51Y-01A	854	0	2.43978	4.48671	4.65726	6.99441	6.20503	Tumor	CESC
TCGA-DS-A1OB-01A	861	1	1.4082	2.57467	5.92747	8.28479	6.36467	Tumor	CESC
TCGA-FU-A3YQ-01A	861	0	1.96366	3.75247	5.22318	6.91772	5.82935	Tumor	CESC
TCGA-JW-A69B-01A	863	0	1.49952	3.92986	0.860462	7.67168	5.7031	Tumor	CESC
TCGA-DS-A1OA-01A	879	1	2.45311	4.57227	6.43687	7.32896	5.9405	Tumor	CESC
TCGA-XS-A8TJ-01A	890	0	1.45599	3.72427	5.21969	6.58423	6.28089	Tumor	CESC
TCGA-IR-A3LK-01A	908	1	2.20936	3.09652	5.45464	7.59981	5.37003	Tumor	CESC
TCGA-VS-A9UB-01A	911	0	2.7718	4.87106	3.97818	7.22319	5.01387	Tumor	CESC
TCGA-C5-A1M8-01A	919	0	0.417839	5.14749	2.61371	7.14097	4.79232	Tumor	CESC
TCGA-EA-A3HR-01A	940	0	0.88643	2.9106	5.83502	7.30679	5.95123	Tumor	CESC
TCGA-VS-A8QM-01A	951	1	3.53619	3.69464	4.76556	6.8841	5.48664	Tumor	CESC
TCGA-FU-A3HY-01A	954	0	0.291546	2.70077	6.92006	7.34923	6.42517	Tumor	CESC
TCGA-EA-A3HT-01A	954	0	1.96899	3.04662	6.46153	7.0563	6.28973	Tumor	CESC
TCGA-C5-A1M6-01A	955	1	0.203058	3.06604	4.50908	6.26773	6.25088	Tumor	CESC
TCGA-EA-A3HS-01A	959	0	1.89518	3.5342	4.38174	7.45166	6.98716	Tumor	CESC
TCGA-EA-A439-01A	965	0	1.36455	4.05134	2.04936	6.77332	5.86251	Tumor	CESC
TCGA-VS-A8Q8-01A	978	1	1.59471	5.94826	4.83773	7.02443	6.13395	Tumor	CESC
TCGA-VS-A8EH-01A	986	0	0.773663	3.26745	5.1631	6.8161	6.07641	Tumor	CESC
TCGA-C5-A2M2-01A	1011	1	0.854063	5.68935	1.03082	6.6594	6.15948	Tumor	CESC
TCGA-EA-A3HU-01A	1013	0	2.97402	5.13101	7.44249	6.80065	5.86086	Tumor	CESC
TCGA-VS-A94Z-01A	1015	0	4.16318	4.36475	5.14649	6.8556	5.86343	Tumor	CESC
TCGA-C5-A1MQ-01A	1031	0	2.02548	4.89169	5.26682	6.51677	5.43797	Tumor	CESC
TCGA-MU-A5YI-01A	1053	0	1.14485	3.17987	5.58494	7.12648	5.52771	Tumor	CESC
TCGA-C5-A1M9-01A	1065	1	0.725569	4.54079	5.42732	6.77125	6.51182	Tumor	CESC
TCGA-MY-A5BE-01A	1066	0	4.09915	6.81337	2.69758	6.26767	5.5688	Tumor	CESC
TCGA-FU-A57G-01A	1078	0	1.13465	2.81006	5.91948	7.21434	6.28426	Tumor	CESC
TCGA-C5-A1MI-01A	1083	1	2.80504	4.10429	2.65749	6.95069	6.34337	Tumor	CESC
TCGA-VS-A8QA-01A	1099	0	0.961986	4.64855	4.76293	6.21118	5.48819	Tumor	CESC
TCGA-FU-A3HZ-01A	1103	0	1.44426	3.58621	3.04274	6.83849	6.28464	Tumor	CESC
TCGA-IR-A3LL-01A	1106	0	2.27758	5.35628	5.34629	7.25083	5.99566	Tumor	CESC
TCGA-C5-A1BI-01B	1112	0	2.75274	3.07706	6.09203	7.28915	5.72045	Tumor	CESC
TCGA-DS-A0VK-01A	1118	1	0.474322	3.90996	5.63455	7.46542	6.29505	Tumor	CESC
TCGA-EA-A3Y4-01A	1122	0	2.13628	4.65287	8.59639	6.71492	6.44943	Tumor	CESC
TCGA-EA-A3HQ-01A	1136	0	2.73155	2.91968	4.21822	7.25057	6.26678	Tumor	CESC
TCGA-C5-A2M1-01A	1169	0	3.30208	5.16848	0.773991	7.01546	5.26475	Tumor	CESC
TCGA-C5-A1MH-01A	1186	1	2.82013	4.47268	5.85595	6.39389	6.34111	Tumor	CESC
TCGA-EA-A1QS-01A	1203	0	1.40626	2.74636	4.85254	6.9496	6.50592	Tumor	CESC
TCGA-VS-A8QH-01A	1210	1	0.469355	3.57821	3.93704	7.55589	6.0018	Tumor	CESC
TCGA-VS-A950-01A	1221	0	1.58538	5.13552	5.22141	7.25394	5.93399	Tumor	CESC
TCGA-EA-A1QT-01A	1243	0	2.03442	5.20097	4.67848	7.69966	5.34395	Tumor	CESC
TCGA-VS-A94W-01A	1243	0	4.5343	4.6324	3.41204	6.36391	5.67252	Tumor	CESC
TCGA-C5-A1MN-01A	1245	1	1.10583	2.90861	7.18182	7.68318	6.45192	Tumor	CESC
TCGA-EK-A2RA-01A	1246	0	2.67153	4.26	4.75148	6.45167	5.63499	Tumor	CESC
TCGA-VS-A9UQ-01A	1263	0	1.0086	5.01611	1.74293	7.01929	5.78803	Tumor	CESC
TCGA-VS-A9U6-01A	1320	0	2.09732	3.10091	3.53954	6.76123	6.55956	Tumor	CESC
TCGA-C5-A2LS-01A	1345	0	0.360685	4.33085	0.948366	5.84659	5.59843	Tumor	CESC
TCGA-JX-A3Q8-01A	1357	0	1.29643	4.34355	1.86863	6.48203	5.88647	Tumor	CESC
TCGA-DG-A2KL-01A	1367	0	2.08182	2.99566	6.64798	7.05873	5.55635	Tumor	CESC
TCGA-VS-A9UI-01A	1372	1	2.3043	3.69047	4.20272	6.71189	5.17773	Tumor	CESC
TCGA-VS-A8EG-01A	1386	0	1.09665	3.91396	6.23404	7.10791	5.6108	Tumor	CESC
TCGA-C5-A8XH-01A	1394	1	2.23836	4.58	4.6665	6.8865	6.4369	Tumor	CESC
TCGA-C5-A1M7-01A	1409	0	1.99859	4.05888	3.02356	7.46398	5.87787	Tumor	CESC
TCGA-VS-A8EC-01A	1415	0	0.241852	3.16067	2.8911	6.81106	6.42157	Tumor	CESC
TCGA-VS-A9UH-01A	1427	0	3.76999	5.42247	4.24369	7.11606	6.67589	Tumor	CESC
TCGA-VS-A9UP-01A	1444	0	0.273132	4.52045	1.81448	6.61121	5.42939	Tumor	CESC
TCGA-EK-A2RL-01A	1453	1	0.261609	5.16159	1.74282	6.62558	5.63075	Tumor	CESC
TCGA-VS-A9UO-01A	1456	0	0.393797	4.88023	2.31616	6.6562	6.22406	Tumor	CESC
TCGA-VS-A9U7-01A	1472	0	2.35137	4.75165	4.74197	6.86042	4.97274	Tumor	CESC
TCGA-BI-A0VR-01A	1505	0	2.72016	4.83598	6.51852	7.10379	6.07188	Tumor	CESC
TCGA-VS-A958-01A	1525	0	2.81277	4.24256	6.19629	6.94207	6.30271	Tumor	CESC
TCGA-VS-A9U5-01A	1535	0	2.33136	3.84769	4.03218	6.51554	6.68267	Tumor	CESC
TCGA-C5-A7XC-01A	1551	0	1.87785	3.74569	4.61549	7.24268	5.94897	Tumor	CESC
TCGA-VS-A959-01A	1561	0	2.07226	3.99958	4.93328	6.35496	5.85776	Tumor	CESC
TCGA-C5-A3HD-01B	1582	0	0.765481	2.88349	5.56082	7.4511	5.93382	Tumor	CESC
TCGA-C5-A1MF-01A	1617	0	0.85586	4.4066	4.64229	5.94228	6.37499	Tumor	CESC
TCGA-VS-A8Q9-01A	1630	0	0.864134	5.06516	3.84977	7.18789	6.68699	Tumor	CESC
TCGA-MY-A5BD-01A	1667	0	1.44556	3.11839	3.29618	6.61482	6.58294	Tumor	CESC
TCGA-VS-A957-01A	1688	0	0.582033	3.00527	5.94421	6.45149	5.91501	Tumor	CESC
TCGA-DS-A0VL-01A	1692	1	2.24794	3.79496	3.91738	7.61001	5.52173	Tumor	CESC
TCGA-VS-A954-01A	1714	0	1.79946	2.86652	4.08728	6.74935	6.22361	Tumor	CESC
TCGA-BI-A0VS-01A	1735	0	2.13141	3.32501	3.37596	6.77668	5.9632	Tumor	CESC
TCGA-C5-A1ME-01A	1756	0	1.4396	5.83947	3.31322	6.36922	6.92465	Tumor	CESC
TCGA-VS-A952-01A	1778	0	1.54623	5.01751	1.86735	6.96131	6.60232	Tumor	CESC
TCGA-DR-A0ZM-01A	1791	0	1.59796	4.22937	5.09868	6.33313	5.51343	Tumor	CESC
TCGA-VS-A8QF-01A	1800	0	1.98924	3.66447	5.36955	6.66481	5.07732	Tumor	CESC
TCGA-EK-A2H0-01A	1847	0	1.05292	4.53483	6.12881	7.48058	6.80634	Tumor	CESC
TCGA-DG-A2KM-01A	1946	0	4.55827	5.31976	4.16389	7.06433	5.20341	Tumor	CESC
TCGA-VS-A8EL-01A	1992	0	2.1693	4.35881	3.5232	6.63075	6.27233	Tumor	CESC
TCGA-IR-A3LB-01A	2032	1	1.06186	5.27291	4.36037	7.08752	6.35773	Tumor	CESC
TCGA-VS-A9UZ-01A	2044	0	1.71359	4.0024	3.43674	6.62179	6.55782	Tumor	CESC
TCGA-C5-A1M5-01A	2052	1	2.13085	4.30352	5.25392	6.65026	5.47026	Tumor	CESC
TCGA-ZJ-A8QQ-01A	2056	0	1.49152	5.01305	6.61153	7.09908	6.82209	Tumor	CESC
TCGA-C5-A1BE-01B	2094	1	2.20994	5.05527	6.53585	7.5357	6.65416	Tumor	CESC
TCGA-UC-A7PI-01A	2114	0	0.659404	4.60041	0.645046	6.87125	6.71562	Tumor	CESC
TCGA-C5-A2LT-01A	2226	0	2.50488	2.63411	6.44616	7.39645	6.75602	Tumor	CESC
TCGA-C5-A2LV-01A	2234	0	2.31378	2.88579	3.95903	7.61119	6.00966	Tumor	CESC
TCGA-C5-A2LY-01A	2383	0	2.73685	4.60925	4.85625	7.00173	4.91569	Tumor	CESC
TCGA-IR-A3LH-01A	2394	0	3.01979	4.8335	4.81203	7.52897	5.62547	Tumor	CESC
TCGA-IR-A3LI-01A	2493	0	0	4.9065	2.19911	5.44204	6.48139	Tumor	CESC
TCGA-DG-A2KK-01A	2496	0	1.05275	2.8393	5.82082	6.43531	5.93659	Tumor	CESC
TCGA-C5-A1BM-01A	2520	1	2.01659	3.99613	5.26383	7.20578	6.10767	Tumor	CESC
TCGA-C5-A2LX-01A	2526	0	3.91359	5.48264	3.31595	5.86859	6.55589	Tumor	CESC
TCGA-DR-A0ZL-01A	2669	0	1.32245	3.86232	4.84449	8.11282	6.81341	Tumor	CESC
TCGA-UC-A7PF-01A	2859	1	2.21452	4.71747	5.42062	6.48734	5.84608	Tumor	CESC
TCGA-C5-A7UI-01A	2888	1	2.50782	5.85634	7.0534	6.983	6.10764	Tumor	CESC
TCGA-DG-A2KJ-01A	2893	0	1.53922	5.24301	4.95429	4.211	5.24381	Tumor	CESC
TCGA-IR-A3LF-01A	2949	0	1.90398	4.38612	0.430218	6.75979	6.35769	Tumor	CESC
TCGA-C5-A8XK-01A	3039	0	1.23047	4.4796	5.39718	7.56302	6.76584	Tumor	CESC
TCGA-C5-A2LZ-01A	3046	1	2.03864	3.87415	5.99912	7.33056	6.06377	Tumor	CESC
TCGA-C5-A7CJ-01A	3097	1	2.98629	4.24204	5.346	7.28351	6.46855	Tumor	CESC
TCGA-EK-A2IR-01A	3442	0	0.212876	2.74911	1.64843	6.53577	7.12929	Tumor	CESC
TCGA-DS-A0VM-01A	3589	0	1.4868	4.82843	5.58623	7.05655	6.34504	Tumor	CESC
TCGA-DS-A0VN-01A	3609	0	3.02767	4.18892	4.39024	7.259	6.45734	Tumor	CESC
TCGA-DS-A1OD-01A	3874	0	4.06442	5.20983	3.7977	6.88731	7.43471	Tumor	CESC
TCGA-IR-A3LC-01A	3935	0	0.801896	4.11438	3.57856	7.26051	7.19202	Tumor	CESC
TCGA-C5-A7UH-01A	3988	0	1.61319	2.12999	5.43046	7.55469	5.81606	Tumor	CESC
TCGA-C5-A7CK-01A	4086	1	0.75052	3.2882	5.48673	7.18455	6.02824	Tumor	CESC
TCGA-IR-A3LA-01A	4172	0	1.14533	3.74286	0.633262	6.65107	5.91379	Tumor	CESC
TCGA-C5-A1BJ-01A	4385	0	3.15294	4.76543	5.75613	6.84336	6.44577	Tumor	CESC
TCGA-C5-A8XJ-01A	4467	0	2.30201	3.64774	4.84143	6.83803	6.16958	Tumor	CESC
TCGA-C5-A7CO-01A	4482	0	1.27193	2.72045	4.338	6.85261	5.3732	Tumor	CESC
TCGA-IR-A3L7-01A	4483	0	0.126652	2.59688	3.73983	6.68549	5.72504	Tumor	CESC
TCGA-C5-A7CH-01A	4694	0	1.30443	3.24759	6.29214	6.82807	6.21477	Tumor	CESC
TCGA-C5-A7UE-01A	4738	0	1.08156	5.24582	4.81552	7.035	6.45765	Tumor	CESC
TCGA-C5-A905-01A	4879	0	0.751247	3.48309	5.90691	7.44911	6.18519	Tumor	CESC
TCGA-C5-A1BL-01A	5271	0	2.55045	3.76411	5.6215	7.61152	5.20939	Tumor	CESC
TCGA-C5-A1BK-01B	5385	0	2.95793	5.88826	5.5527	7.29006	4.87159	Tumor	CESC
TCGA-JX-A3Q0-01A	6375	0	2.5775	4.5931	6.07929	6.64306	5.58669	Tumor	CESC
TCGA-C5-A7CG-01A	6408	0	3.80006	4.888	3.72162	6.7823	5.96105	Tumor	CESC
TCGA-30-1857-01A	8	1	0.452087	3.17127	2.79245	6.26803	4.90359	Tumor	OV
TCGA-23-1107-01A	9	1	0.12805	1.58521	5.85237	5.45306	5.61983	Tumor	OV
TCGA-25-1631-01A	9	1	0.151144	1.79783	3.46006	6.98757	6.80489	Tumor	OV
TCGA-24-2262-01A	11	1	0.898112	1.89424	7.14007	6.8451	5.96369	Tumor	OV
TCGA-23-1809-01A	16	0	0.717978	3.35667	2.89461	6.18196	5.66007	Tumor	OV
TCGA-24-1422-01A	23	1	0.854397	1.74132	5.2845	6.88626	6.33232	Tumor	OV
TCGA-04-1519-01A	24	0	0.076146	1.26412	3.37249	6.47052	6.15182	Tumor	OV
TCGA-VG-A8LO-01A	24	1	0.255908	2.69336	3.57327	6.53108	6.63963	Tumor	OV
TCGA-24-2261-01A	24	1	2.00601	2.21139	2.70536	6.22431	6.298	Tumor	OV
TCGA-24-2288-01A	25	1	1.60941	3.65314	6.53237	6.98887	6.17565	Tumor	OV
TCGA-25-2392-01A	31	1	1.02208	3.13363	2.682	6.30456	6.59732	Tumor	OV
TCGA-25-1312-01A	31	1	0.249701	1.90395	3.00863	6.43083	6.32804	Tumor	OV
TCGA-04-1341-01A	33	0	0.155706	3.20966	3.63162	5.37905	5.9107	Tumor	OV
TCGA-24-1471-01A	36	0	0.505391	0.961093	1.04218	6.19702	5.44552	Tumor	OV
TCGA-57-1585-01A	53	1	1.26112	2.16666	5.80828	6.54975	5.59894	Tumor	OV
TCGA-25-1317-01A	61	1	0.446668	2.02271	3.37097	6.08816	5.67255	Tumor	OV
TCGA-61-1995-01A	61	0	1.62477	2.27775	2.83007	6.35407	6.44824	Tumor	OV
TCGA-59-2355-01A	65	1	0.627696	2.0472	4.59805	6.51478	6.60211	Tumor	OV
TCGA-31-1959-01A	67	0	1.43743	3.14936	4.17081	6.15126	7.90085	Tumor	OV
TCGA-20-1687-01A	81	0	0.466404	1.59017	2.37392	6.40254	6.14776	Tumor	OV
TCGA-13-0724-01A	83	1	0.0976837	2.06902	3.57586	5.9303	5.29638	Tumor	OV
TCGA-20-1686-01A	89	0	0.198053	2.16254	3.73536	5.6166	5.64492	Tumor	OV
TCGA-25-2401-01A	90	1	1.79571	3.45972	3.79419	6.56901	6.56467	Tumor	OV
TCGA-25-1322-01A	91	1	0.469222	2.42401	3.28619	7.10607	6.00521	Tumor	OV
TCGA-25-2396-01A	92	1	1.39742	3.04278	1.63435	5.6597	5.78413	Tumor	OV
TCGA-09-1673-01A	92	0	0.269093	1.32577	3.39443	7.14741	4.74156	Tumor	OV
TCGA-23-1111-01A	98	0	0.222886	2.71719	2.91434	7.46662	6.81479	Tumor	OV
TCGA-24-1470-01A	105	0	2.68107	2.96171	2.41741	6.66015	6.08633	Tumor	OV
TCGA-24-1843-01A	106	0	0.777225	2.72896	1.89981	6.03485	6.78505	Tumor	OV
TCGA-24-1844-01A	113	0	0.043669	1.53822	3.93811	6.23848	5.96507	Tumor	OV
TCGA-24-1845-01A	116	0	0.387676	2.4153	4.13535	5.69298	5.91575	Tumor	OV
TCGA-61-2003-01A	122	0	0.764276	2.57467	3.35377	6.97089	5.93706	Tumor	OV
TCGA-13-1496-01A	129	1	1.45941	4.21737	1.98943	6.19106	5.32637	Tumor	OV
TCGA-23-1120-01A	130	0	2.00374	3.46721	1.66322	6.33387	5.52945	Tumor	OV
TCGA-24-1846-01A	133	0	1.58839	2.13983	2.3108	5.76562	5.78641	Tumor	OV
TCGA-09-2048-01A	138	1	0.209529	1.69642	2.50955	5.71294	5.39181	Tumor	OV
TCGA-61-2088-01A	145	0	0.107946	0.89211	4.93737	5.54103	7.06204	Tumor	OV
TCGA-24-1427-01A	147	0	1.18166	1.84372	4.42112	5.73602	7.10756	Tumor	OV
TCGA-29-1784-01A	163	0	1.59226	2.90346	5.92688	5.52281	5.45063	Tumor	OV
TCGA-24-1426-01A	163	0	0.0316961	2.60289	2.79774	6.38838	5.44242	Tumor	OV
TCGA-59-2363-01A	165	0	0.136914	2.38796	2.81702	6.51213	6.42256	Tumor	OV
TCGA-61-1998-01A	168	0	0.386514	2.02351	5.30999	6.2873	6.05289	Tumor	OV
TCGA-24-1850-01A	168	0	0.519431	2.63726	4.24885	5.89967	5.92068	Tumor	OV
TCGA-61-1900-01A	176	0	0.350346	1.44644	4.0942	6.32556	6.14758	Tumor	OV
TCGA-24-1425-01A	181	0	1.32958	1.8796	6.19097	6.56598	5.73062	Tumor	OV
TCGA-24-1424-01A	183	0	0.543269	2.84793	4.78892	6.60904	6.0853	Tumor	OV
TCGA-30-1862-01A	186	1	0.993327	2.21063	5.08773	7.64123	6.48954	Tumor	OV
TCGA-09-2044-01B	186	0	1.64504	3.70981	2.15951	6.81134	6.1056	Tumor	OV
TCGA-13-0714-01A	189	1	0.291668	0.98496	4.12394	5.23091	5.19594	Tumor	OV
TCGA-24-1423-01A	190	0	1.15989	3.2824	5.59088	6.59944	6.16054	Tumor	OV
TCGA-24-1413-01A	192	0	0.777937	3.97692	4.77457	5.83124	6.26475	Tumor	OV
TCGA-24-1416-01A	194	0	0.0300552	2.40883	3.26185	5.77652	5.57239	Tumor	OV
TCGA-61-2102-01A	197	1	0.0474865	1.15453	8.51564	7.0903	6.49483	Tumor	OV
TCGA-31-1953-01A	204	0	2.01591	2.59748	4.38811	7.30803	5.1462	Tumor	OV
TCGA-29-1783-01A	220	0	0.857892	2.40226	4.15167	6.39508	6.64766	Tumor	OV
TCGA-24-0966-01A	232	0	0.337088	3.45452	2.42485	5.09739	4.36445	Tumor	OV
TCGA-24-1417-01A	238	0	2.63559	4.01306	5.29579	6.34741	5.95634	Tumor	OV
TCGA-24-1419-01A	239	0	0.0194398	1.72679	2.63665	6.33482	6.70921	Tumor	OV
TCGA-24-1418-01A	243	0	0.802538	2.03126	3.52204	7.27839	6.04672	Tumor	OV
TCGA-24-1842-01A	253	0	1.81214	2.68955	5.15528	7.82425	6.14976	Tumor	OV
TCGA-29-1781-01A	255	0	2.14476	3.93412	7.02266	5.18632	5.27213	Tumor	OV
TCGA-23-1029-01B	268	0	0.606221	4.17575	3.18666	6.01805	6.01281	Tumor	OV
TCGA-24-1469-01A	277	0	1.21967	3.06067	2.36771	5.60897	6.07777	Tumor	OV
TCGA-59-2352-01A	286	1	1.39528	5.04018	3.54724	5.90095	6.88398	Tumor	OV
TCGA-WR-A838-01A	304	1	0.0523075	3.19905	4.67761	6.10499	6.68035	Tumor	OV
TCGA-09-1659-01B	304	1	0.209614	3.07841	4.42262	4.9653	6.47042	Tumor	OV
TCGA-24-1565-01A	312	1	0.137907	2.00964	1.3878	5.67122	6.21641	Tumor	OV
TCGA-24-1928-01A	336	1	0.926205	2.03323	4.33099	7.1595	5.70126	Tumor	OV
TCGA-61-1721-01A	338	0	0.659177	1.9489	5.22855	7.17354	5.24628	Tumor	OV
TCGA-24-1847-01A	343	0	2.47296	3.29258	3.87244	6.39332	6.39795	Tumor	OV
TCGA-57-1583-01A	346	1	0.344689	1.79785	2.67314	6.00315	5.66862	Tumor	OV
TCGA-24-0970-01B	354	1	0.165063	4.67383	2.77131	6.42259	6.19613	Tumor	OV
TCGA-29-1776-01A	360	0	0.9308	2.86467	2.57873	6.5537	5.97951	Tumor	OV
TCGA-04-1343-01A	361	1	0.573928	3.51637	4.16456	5.71095	5.93378	Tumor	OV
TCGA-5X-AA5U-01A	361	0	0.0989585	2.03523	4.60088	5.14782	5.36947	Tumor	OV
TCGA-29-1777-01A	374	0	0.948787	2.43865	3.96024	6.36223	5.04514	Tumor	OV
TCGA-13-0725-01A	377	1	0.697624	2.60238	4.1882	5.91055	6.08774	Tumor	OV
TCGA-09-2056-01B	379	0	0.438789	2.93275	2.89526	6.07778	6.08669	Tumor	OV
TCGA-24-1464-01A	379	1	0.660507	2.45825	1.70638	6.09916	6.2223	Tumor	OV
TCGA-25-1627-01A	394	1	0.189043	3.97084	4.37379	6.54689	7.11189	Tumor	OV
TCGA-25-1323-01A	395	1	0.092638	1.78819	3.05567	6.4726	6.27674	Tumor	OV
TCGA-25-2042-01A	396	1	0.943219	2.4314	5.30835	6.45475	6.30164	Tumor	OV
TCGA-61-2000-01A	441	0	0.588745	2.75072	6.45425	7.2225	6.72299	Tumor	OV
TCGA-13-1512-01A	442	0	0.680922	1.98903	4.27618	6.95131	5.22073	Tumor	OV
TCGA-10-0933-01A	446	1	0.176477	2.35721	3.64848	5.02267	5.75216	Tumor	OV
TCGA-29-1778-01A	454	0	1.12652	2.54918	3.67804	6.21477	6.24796	Tumor	OV
TCGA-25-1870-01A	455	1	0.262671	1.84622	1.928	6.33165	6.7755	Tumor	OV
TCGA-25-1329-01A	457	1	0.353003	1.44125	4.91871	5.88072	5.94578	Tumor	OV
TCGA-13-0727-01A	462	1	0.106052	2.90313	3.52946	5.12145	6.0755	Tumor	OV
TCGA-23-1024-01A	468	0	0.271818	2.51524	1.24778	5.89021	7.58993	Tumor	OV
TCGA-61-1918-01A	479	1	1.02146	1.96779	3.54423	6.17306	5.56359	Tumor	OV
TCGA-24-2293-01A	506	1	1.05066	3.11222	5.7306	6.66623	6.40595	Tumor	OV
TCGA-29-1701-01A	515	1	1.02693	2.71797	3.71658	6.51055	5.43637	Tumor	OV
TCGA-25-1626-01A	518	1	2.05258	2.99439	4.65822	6.8242	6.14804	Tumor	OV
TCGA-24-1567-01A	524	1	0.0809706	3.63457	2.81753	6.56059	7.40651	Tumor	OV
TCGA-29-1774-01A	527	0	0	0.601979	5.19085	6.14821	5.46999	Tumor	OV
TCGA-29-1761-01A	528	1	1.24327	2.51288	2.22101	5.89403	6.00955	Tumor	OV
TCGA-24-1428-01A	529	0	1.31143	3.05927	3.5331	6.44802	6.07312	Tumor	OV
TCGA-13-1411-01A	531	1	1.14543	3.09044	2.78953	6.46656	7.02521	Tumor	OV
TCGA-13-0730-01A	542	1	0.374638	3.01114	5.66495	6.1397	6.4616	Tumor	OV
TCGA-09-0367-01A	547	1	0.290874	1.9995	4.42777	6.01012	6.40361	Tumor	OV
TCGA-09-1670-01A	547	0	0.237925	2.09922	2.43935	6.44672	5.94181	Tumor	OV
TCGA-61-2002-01A	547	0	2.36213	2.83616	2.48931	6.58959	6.4424	Tumor	OV
TCGA-29-1705-01A	555	1	0.590785	2.23664	4.15778	6.2548	6.28283	Tumor	OV
TCGA-24-2033-01A	562	1	0.147014	0.720198	5.14516	5.85253	5.90577	Tumor	OV
TCGA-10-0928-01A	563	1	0.189637	2.61797	1.29108	6.36104	6.91118	Tumor	OV
TCGA-25-1623-01A	565	1	3.23326	3.77603	3.09554	6.97977	6.10572	Tumor	OV
TCGA-24-1434-01A	568	1	1.51098	2.46132	5.2608	6.56304	6.38907	Tumor	OV
TCGA-31-1950-01A	571	0	1.24172	3.31698	3.78131	5.97157	6.91094	Tumor	OV
TCGA-OY-A56Q-01A	576	0	0	0.491173	1.11723	6.25603	6.18729	Tumor	OV
TCGA-24-1431-01A	583	1	0.330012	0.838256	1.06738	6.24337	6.27798	Tumor	OV
TCGA-13-0901-01B	589	0	0.274	2.91906	3.23117	6.23997	6.01702	Tumor	OV
TCGA-23-1116-01A	592	1	1.39243	3.1121	2.32686	6.16182	6.15495	Tumor	OV
TCGA-24-1558-01A	594	1	0.0823808	1.74349	4.04295	6.76047	7.1507	Tumor	OV
TCGA-24-0968-01A	598	1	0.887404	2.24438	2.1599	5.59934	5.34446	Tumor	OV
TCGA-10-0937-01A	608	1	0.674814	3.21751	1.87552	5.98924	5.62985	Tumor	OV
TCGA-25-2399-01A	608	1	0.93833	2.91921	4.68651	6.51313	6.80485	Tumor	OV
TCGA-13-0795-01A	619	1	0.730209	2.52309	1.62535	5.95306	4.90585	Tumor	OV
TCGA-59-A5PD-01A	624	1	1.01757	1.79896	4.10716	6.9342	5.72906	Tumor	OV
TCGA-25-1628-01A	627	1	2.39336	3.24484	3.94707	6.47561	6.27212	Tumor	OV
TCGA-61-2109-01A	629	1	0.512708	3.51494	3.85406	6.78722	6.6331	Tumor	OV
TCGA-13-1485-01A	629	1	0.454847	1.54022	2.39423	6.88618	6.52397	Tumor	OV
TCGA-10-0938-01A	636	1	0.0408905	2.58706	1.69442	4.84753	7.44157	Tumor	OV
TCGA-61-1724-01A	637	1	0.588286	2.90658	3.64898	6.82204	6.59193	Tumor	OV
TCGA-09-2054-01A	637	1	0.867805	1.8801	5.88205	6.15712	5.06718	Tumor	OV
TCGA-57-1584-01A	643	0	0.150901	1.92314	1.63017	6.61375	6.37783	Tumor	OV
TCGA-36-1570-01A	655	0	0.451921	3.09294	2.44198	6.20551	5.8605	Tumor	OV
TCGA-24-1474-01A	676	1	0.376765	1.9091	5.12274	6.61143	6.86348	Tumor	OV
TCGA-61-2113-01A	676	1	2.05847	3.82157	4.61003	7.10893	6.61085	Tumor	OV
TCGA-24-0982-01A	679	1	0.469693	1.9096	4.71512	5.8989	5.99456	Tumor	OV
TCGA-59-2350-01A	679	1	0.69942	3.95919	3.97668	6.68487	6.13286	Tumor	OV
TCGA-57-1586-01A	679	0	0.509164	2.49572	1.57748	4.21768	6.18234	Tumor	OV
TCGA-13-1487-01A	681	1	0.209074	1.62827	4.66213	6.27882	5.49556	Tumor	OV
TCGA-31-1951-01A	684	0	2.0833	3.11665	6.22852	6.53582	6.38184	Tumor	OV
TCGA-36-1574-01A	686	0	1.69594	3.51158	6.83322	5.96561	6.1478	Tumor	OV
TCGA-24-1923-01A	690	1	0.342323	1.85744	2.40781	5.96218	5.52076	Tumor	OV
TCGA-36-1571-01A	695	1	0.395562	2.90698	2.10965	6.0792	7.40386	Tumor	OV
TCGA-29-1769-01A	699	0	0.878685	3.31297	2.99724	6.15827	5.95023	Tumor	OV
TCGA-20-0987-01A	701	1	0.768076	3.7101	5.55371	5.66465	5.43809	Tumor	OV
TCGA-25-1877-01A	730	1	0.989924	1.89693	3.226	5.28561	5.35751	Tumor	OV
TCGA-57-1582-01A	731	1	0.975715	1.12642	2.44989	6.38513	6.67789	Tumor	OV
TCGA-36-1580-01A	737	1	1.52431	2.56737	4.30446	7.05678	6.93499	Tumor	OV
TCGA-29-1770-01A	741	0	0.238012	1.70493	5.60841	6.50967	4.66451	Tumor	OV
TCGA-36-1581-01A	751	0	3.102	3.87311	4.05335	5.40458	5.99352	Tumor	OV
TCGA-57-1994-01A	761	0	2.20689	3.08701	2.90845	5.86657	7.23188	Tumor	OV
TCGA-57-1993-01A	763	0	0.16496	2.85774	3.19512	6.21516	7.14775	Tumor	OV
TCGA-20-1683-01A	772	0	0.710949	2.3826	3.4111	7.12767	4.69779	Tumor	OV
TCGA-36-1577-01A	783	0	0.0586612	1.3309	3.73114	6.04118	7.34745	Tumor	OV
TCGA-20-0991-01A	797	0	1.93107	4.29025	4.5399	5.58365	5.68506	Tumor	OV
TCGA-23-1026-01B	816	0	1.14345	2.31866	4.03162	5.92951	5.88458	Tumor	OV
TCGA-25-1313-01A	820	1	0.554434	3.71496	2.6835	7.29328	5.63736	Tumor	OV
TCGA-24-1544-01A	820	1	0.218489	2.18144	2.06053	6.17326	6.02159	Tumor	OV
TCGA-25-2409-01A	821	1	0.558639	2.05976	3.484	6.10369	7.00678	Tumor	OV
TCGA-20-1682-01A	837	0	1.2809	1.46396	4.78806	6.65881	6.13963	Tumor	OV
TCGA-61-1728-01A	848	0	0.324572	2.04789	5.41981	5.58931	6.53544	Tumor	OV
TCGA-24-2035-01A	857	1	1.46995	2.39496	4.22708	6.18745	5.45053	Tumor	OV
TCGA-24-1430-01A	863	1	0.0932643	1.27584	3.88468	5.68314	6.55817	Tumor	OV
TCGA-13-1405-01A	868	1	0.71216	2.20902	6.24054	6.76988	5.5563	Tumor	OV
TCGA-04-1648-01A	871	1	0.197731	1.75971	2.64048	6.02861	6.02768	Tumor	OV
TCGA-36-1568-01A	875	0	0.961267	1.98411	1.56014	7.10505	5.41925	Tumor	OV
TCGA-25-2404-01A	883	1	0.944185	2.60958	3.883	6.57243	5.87129	Tumor	OV
TCGA-36-1569-01A	885	0	1.7863	2.72109	1.73686	6.30349	6.85139	Tumor	OV
TCGA-04-1536-01A	885	1	0.122987	1.73152	2.39189	7.15778	6.76849	Tumor	OV
TCGA-23-1030-01A	886	0	0.998588	2.97317	2.05333	6.14087	5.76282	Tumor	OV
TCGA-09-0364-01A	887	1	0	0.755952	3.97669	5.41921	5.40331	Tumor	OV
TCGA-13-1483-01A	895	1	0.814892	2.89198	3.60725	6.53152	6.11532	Tumor	OV
TCGA-30-1891-01A	914	1	0.478279	1.15737	5.55822	6.81758	6.36124	Tumor	OV
TCGA-36-1576-01A	915	0	1.74484	3.33605	3.52312	6.4606	6.76837	Tumor	OV
TCGA-31-1946-01A	918	0	1.67084	2.84662	4.38234	6.30611	5.78718	Tumor	OV
TCGA-24-1924-01A	919	1	2.44786	3.02194	2.77354	6.31396	5.49107	Tumor	OV
TCGA-09-1669-01A	928	0	1.84682	2.69639	3.33869	6.48879	5.82835	Tumor	OV
TCGA-61-2012-01A	932	0	1.57702	3.24309	4.65458	6.32542	6.56473	Tumor	OV
TCGA-61-2008-02A	932	0	2.54616	3.22417	1.75742	6.06531	5.72485	Tumor	OV
TCGA-61-2008-01A	932	0	0.871613	1.43571	4.75222	6.47506	5.63435	Tumor	OV
TCGA-04-1365-01A	947	0	1.56405	3.72392	5.4518	6.11468	5.81362	Tumor	OV
TCGA-29-1697-01A	949	1	0.332011	3.91173	4.24847	6.36224	6.13354	Tumor	OV
TCGA-23-1113-01A	949	1	0	1.63984	6.51748	5.94974	5.85723	Tumor	OV
TCGA-13-0726-01A	949	1	0.184401	4.47127	5.44404	6.8219	6.07433	Tumor	OV
TCGA-29-1710-01A	951	1	2.13288	3.44562	2.28107	6.57429	6.61266	Tumor	OV
TCGA-29-1768-01A	952	1	1.00687	2.99958	3.42707	6.50637	5.90192	Tumor	OV
TCGA-61-1907-01A	952	0	2.02903	4.35197	2.07713	6.78845	5.596	Tumor	OV
TCGA-61-1725-01A	956	0	0.544466	2.20895	4.24677	5.65472	6.14477	Tumor	OV
TCGA-24-2271-01A	962	1	1.91095	2.32145	2.82838	6.07511	6.06184	Tumor	OV
TCGA-61-1733-01A	967	0	0.336865	3.1998	3.40276	6.35519	7.44669	Tumor	OV
TCGA-23-1027-01A	976	1	0.585392	2.87375	3.5324	6.23814	7.26575	Tumor	OV
TCGA-04-1361-01A	989	0	0.590621	2.72498	1.70561	6.29984	6.20388	Tumor	OV
TCGA-10-0931-01A	1000	1	0.30863	2.63976	3.40002	5.46821	6.63342	Tumor	OV
TCGA-23-1123-01A	1018	1	2.23484	4.52019	1.54725	7.50441	6.57456	Tumor	OV
TCGA-61-1741-01A	1024	1	1.89627	3.14387	3.11486	5.91905	6.25035	Tumor	OV
TCGA-04-1364-01A	1024	1	0.0485649	2.08637	6.20169	6.63852	5.8266	Tumor	OV
TCGA-29-1696-01A	1032	1	0.405293	2.22643	4.44225	5.93036	5.2022	Tumor	OV
TCGA-25-1321-01A	1033	1	0.179287	2.64694	2.74792	6.17475	6.70819	Tumor	OV
TCGA-13-1506-01A	1039	1	0.839321	2.782	4.12103	5.90341	7.39228	Tumor	OV
TCGA-59-2354-01A	1046	1	1.48195	2.9113	3.36663	6.96951	6.49495	Tumor	OV
TCGA-29-1711-01A	1053	0	1.8619	4.16629	3.0636	6.92318	5.73135	Tumor	OV
TCGA-30-1861-01A	1058	1	0.240603	1.41277	3.10771	6.71674	5.8061	Tumor	OV
TCGA-24-2026-01A	1059	1	1.40687	2.7304	5.11232	6.26589	6.81365	Tumor	OV
TCGA-25-1318-01A	1064	1	0.520173	1.31123	5.77866	6.54712	5.76374	Tumor	OV
TCGA-09-2045-01A	1069	1	0.342885	2.98241	1.1932	6.01365	6.21324	Tumor	OV
TCGA-13-0804-01A	1073	1	0.328684	2.13476	2.04814	5.75135	5.98313	Tumor	OV
TCGA-09-0369-01A	1082	1	0.0737686	1.69928	4.73821	6.25569	6.86571	Tumor	OV
TCGA-29-A5NZ-01A	1088	1	1.45364	1.79364	2.74242	6.03985	6.40933	Tumor	OV
TCGA-61-1738-01A	1089	1	0.763234	4.2384	3.0792	6.31241	6.03567	Tumor	OV
TCGA-25-1634-01A	1091	1	0	0.33499	1.95124	5.48955	3.61084	Tumor	OV
TCGA-04-1651-01A	1102	1	0.279906	2.14794	3.03057	6.13811	6.58386	Tumor	OV
TCGA-24-2290-01A	1102	1	0.942442	2.67943	4.23668	6.25208	6.70675	Tumor	OV
TCGA-30-1853-01A	1103	1	0.0312727	0.429065	2.94087	6.34306	5.64088	Tumor	OV
TCGA-29-1785-01A	1104	1	1.95976	3.52164	4.47836	6.90519	5.94615	Tumor	OV
TCGA-30-1866-01A	1114	1	0.768626	3.23618	2.30533	6.4843	5.13695	Tumor	OV
TCGA-10-0936-01A	1123	1	0.922648	3.42551	4.24948	5.29373	5.76358	Tumor	OV
TCGA-61-1910-01A	1127	0	0.168221	2.98473	1.99543	5.86671	5.48674	Tumor	OV
TCGA-25-1320-01A	1155	1	0.632719	1.98354	3.77053	6.37012	5.4568	Tumor	OV
TCGA-25-2393-01A	1157	1	0.492398	2.26283	2.32351	5.39997	6.03918	Tumor	OV
TCGA-30-1714-01A	1158	1	0.215244	1.80132	2.61918	5.9072	5.77213	Tumor	OV
TCGA-61-1919-01A	1161	1	1.13867	2.22212	3.14429	6.09978	6.84206	Tumor	OV
TCGA-25-1630-01A	1162	1	0.503401	3.11517	3.73855	6.05915	7.21506	Tumor	OV
TCGA-24-1616-01A	1163	1	0.105504	1.80668	5.0369	6.54	6.15056	Tumor	OV
TCGA-09-1661-01B	1169	1	0.0539527	0.804072	0.630595	5.55639	6.43412	Tumor	OV
TCGA-29-1694-01A	1187	1	0.770553	2.80733	5.04777	6.58135	6.87697	Tumor	OV
TCGA-23-1122-01A	1189	1	0.431757	3.13179	3.91061	6.20511	5.35785	Tumor	OV
TCGA-29-1766-01A	1199	1	0.972191	2.92305	4.85197	5.52713	5.82485	Tumor	OV
TCGA-09-2053-01C	1209	0	0.926839	3.98647	2.98011	6.01541	5.99928	Tumor	OV
TCGA-61-2009-01A	1212	0	1.26936	3.05229	3.25939	6.04881	6.01018	Tumor	OV
TCGA-24-1557-01A	1213	1	0.614411	1.94537	5.21217	6.87717	5.5233	Tumor	OV
TCGA-29-1695-01A	1229	1	0.609096	1.54339	4.69642	6.67487	6.90788	Tumor	OV
TCGA-23-1023-01A	1233	0	0.312087	3.9545	3.79527	5.7595	6.86745	Tumor	OV
TCGA-04-1332-01A	1247	1	0.15702	1.98155	3.45927	5.63545	6.329	Tumor	OV
TCGA-24-1550-01A	1249	1	1.64754	2.03197	7.18408	6.70126	6.33976	Tumor	OV
TCGA-25-1326-01A	1249	1	1.10371	1.59394	3.72948	6.23675	6.11806	Tumor	OV
TCGA-24-1552-01A	1259	1	0.363519	1.10112	3.92419	6.40465	5.88191	Tumor	OV
TCGA-24-0979-01A	1264	1	0.323991	2.93956	5.77927	6.42682	5.74361	Tumor	OV
TCGA-09-1665-01B	1266	1	0.683576	2.79907	2.11045	6.18729	5.56182	Tumor	OV
TCGA-29-1707-02A	1277	0	0.838703	3.36706	5.787	5.67413	5.05677	Tumor	OV
TCGA-25-2400-01A	1278	1	0.131568	2.14956	3.54398	6.7615	6.15593	Tumor	OV
TCGA-25-1316-01A	1279	1	0.798	1.01236	0.915024	6.12639	5.78591	Tumor	OV
TCGA-61-1911-01A	1293	0	2.2526	3.17182	1.88355	6.3688	4.66172	Tumor	OV
TCGA-13-1501-01A	1314	1	0.313165	0.947805	4.10968	6.10405	6.26115	Tumor	OV
TCGA-13-0893-01B	1319	1	0.732193	2.55949	2.84185	6.16544	6.31916	Tumor	OV
TCGA-24-1435-01A	1324	1	0.974286	1.84128	4.07309	6.512	5.18321	Tumor	OV
TCGA-04-1331-01A	1336	1	0.490374	2.12116	2.40509	5.90572	5.79276	Tumor	OV
TCGA-24-1560-01A	1341	1	0.527016	3.47444	5.64107	6.57437	6.7294	Tumor	OV
TCGA-31-1956-01A	1342	0	2.38119	3.61696	4.53564	6.24287	5.7697	Tumor	OV
TCGA-04-1362-01A	1348	1	0.101203	3.48091	1.45951	6.15699	6.85499	Tumor	OV
TCGA-61-2110-01A	1354	1	0.161383	1.85999	3.46186	6.47782	6.15056	Tumor	OV
TCGA-24-2038-01A	1354	1	0.0657908	1.29432	1.55541	6.64619	5.99548	Tumor	OV
TCGA-13-0911-01A	1355	1	0.754874	3.48492	4.48227	6.04445	6.58083	Tumor	OV
TCGA-13-0720-01A	1355	1	0.232508	2.11681	4.16287	6.43673	6.11852	Tumor	OV
TCGA-24-2281-01A	1357	0	1.65212	2.78919	4.34866	5.30745	6.08693	Tumor	OV
TCGA-13-1510-01A	1359	1	0.977244	2.62086	6.55631	6.77961	6.79417	Tumor	OV
TCGA-61-1737-01A	1364	0	0.635706	1.83626	3.52765	6.56029	5.77289	Tumor	OV
TCGA-24-2023-01A	1364	1	0.764265	2.20911	5.88903	6.77637	6.08211	Tumor	OV
TCGA-30-1860-01A	1366	1	2.69088	2.85206	4.99651	6.72044	6.1219	Tumor	OV
TCGA-25-2398-01A	1369	1	0.697865	2.18832	3.49007	6.30062	6.54515	Tumor	OV
TCGA-29-2428-01A	1372	0	1.83049	3.367	2.82947	6.24253	5.61814	Tumor	OV
TCGA-04-1655-01A	1380	1	0.15408	0.823177	2.4356	6.45171	6.83841	Tumor	OV
TCGA-24-1562-01A	1384	1	0.652937	1.66969	3.76719	6.26403	5.27187	Tumor	OV
TCGA-31-1944-01A	1386	0	1.327	2.83489	4.11175	6.24922	6.43115	Tumor	OV
TCGA-13-0765-01A	1389	1	0.243288	1.64982	5.43014	6.36541	5.14349	Tumor	OV
TCGA-04-1338-01A	1418	0	1.52294	1.44587	4.00892	5.66513	6.00134	Tumor	OV
TCGA-24-1105-01A	1442	1	0.371437	2.8249	4.16656	6.46105	5.72236	Tumor	OV
TCGA-23-1021-01B	1446	1	0.0615185	3.48687	1.94677	5.85419	5.78204	Tumor	OV
TCGA-24-2267-01A	1446	1	2.07948	3.3674	5.64073	6.05471	6.38412	Tumor	OV
TCGA-29-1690-01A	1448	1	1.70047	2.23758	3.18038	6.73494	5.95182	Tumor	OV
TCGA-24-1563-01A	1451	1	0.897935	2.43772	3.44284	6.86916	6.41678	Tumor	OV
TCGA-29-1691-01A	1470	1	0.786516	2.45333	2.92429	5.98681	6.33077	Tumor	OV
TCGA-30-1892-01A	1484	1	0.0723026	0.984396	5.728	6.6125	4.65473	Tumor	OV
TCGA-13-0920-01A	1484	1	0.471294	2.94514	2.10225	6.32834	5.28224	Tumor	OV
TCGA-61-1736-01B	1484	1	0.422699	1.45237	3.88084	5.76809	6.34241	Tumor	OV
TCGA-25-2391-01A	1492	1	0.809678	3.60822	4.90555	6.22571	6.64693	Tumor	OV
TCGA-04-1356-01A	1499	1	0.399239	3.38182	4.05418	6.28574	7.53912	Tumor	OV
TCGA-23-1028-01A	1503	0	0.74429	2.02495	2.44912	6.53731	5.50541	Tumor	OV
TCGA-23-1022-01A	1511	1	0	1.11892	1.65701	5.35152	5.23677	Tumor	OV
TCGA-23-2084-01A	1516	1	1.00792	2.91405	3.79181	6.86063	6.68845	Tumor	OV
TCGA-23-1109-01A	1562	1	0.201191	1.24128	2.2104	5.3743	6.09577	Tumor	OV
TCGA-61-2092-01A	1573	0	0.0561326	2.42831	4.68798	6.47632	6.01214	Tumor	OV
TCGA-30-1718-01A	1579	1	1.45387	3.44596	2.47613	5.5271	5.73768	Tumor	OV
TCGA-24-1551-01A	1579	1	1.0909	1.9161	3.64396	6.11263	5.88874	Tumor	OV
TCGA-25-1635-01A	1583	1	1.24475	2.54337	2.69164	6.15523	6.34301	Tumor	OV
TCGA-25-1315-01A	1583	1	0.106837	2.76131	4.92696	6.22901	6.84994	Tumor	OV
TCGA-24-2298-01A	1620	1	0.744068	3.37877	6.64769	6.37537	6.98522	Tumor	OV
TCGA-24-1103-01A	1646	1	0.297102	2.54136	3.72078	6.35835	6.75067	Tumor	OV
TCGA-13-1511-01A	1650	1	0.203536	3.0736	4.86512	6.30126	6.27438	Tumor	OV
TCGA-23-1110-01A	1658	0	0	3.41221	4.90597	5.56229	5.85569	Tumor	OV
TCGA-13-1477-01A	1662	1	0.139353	1.15588	2.60024	5.58802	4.9673	Tumor	OV
TCGA-13-1408-01A	1680	1	1.00559	2.19942	3.0767	6.59296	5.60174	Tumor	OV
TCGA-09-1668-01B	1684	0	3.11395	3.72974	2.37761	6.26916	5.86686	Tumor	OV
TCGA-61-2101-01A	1688	1	0.261968	1.61233	4.58969	6.77762	6.50488	Tumor	OV
TCGA-24-2297-01A	1699	1	0.340506	3.05429	3.69669	6.03116	5.58551	Tumor	OV
TCGA-04-1514-01A	1720	1	0.0713162	1.90876	2.89265	6.91458	5.8116	Tumor	OV
TCGA-24-1549-01A	1721	1	1.92294	3.48487	4.12334	6.77516	6.50466	Tumor	OV
TCGA-61-1914-01A	1722	0	1.00283	2.85968	3.91388	6.38992	5.32819	Tumor	OV
TCGA-13-0766-01A	1725	1	0.292044	3.15885	5.47631	5.74499	6.31515	Tumor	OV
TCGA-24-2254-01A	1736	1	0.12115	1.4326	4.57724	6.73963	6.72799	Tumor	OV
TCGA-13-1409-01A	1742	1	0	0.694688	2.67462	5.91992	5.49033	Tumor	OV
TCGA-09-1666-01A	1752	0	1.35607	2.84948	2.23082	6.6732	5.72345	Tumor	OV
TCGA-09-0366-01A	1757	1	0.364957	3.27152	2.76541	6.37208	6.62646	Tumor	OV
TCGA-24-1553-01A	1767	1	2.62414	2.81656	0.767555	5.92298	6.8673	Tumor	OV
TCGA-24-2024-01A	1769	1	0.156364	2.57029	2.22863	6.0485	6.83585	Tumor	OV
TCGA-13-0768-01A	1784	1	2.68618	4.422	5.89167	7.27897	5.62129	Tumor	OV
TCGA-13-0916-01A	1785	0	1.21475	3.76324	2.91856	6.16455	8.13126	Tumor	OV
TCGA-25-1632-01A	1799	1	0.0523019	4.05105	5.12571	6.09238	6.14552	Tumor	OV
TCGA-29-1703-01A	1815	1	0.592064	2.15386	2.16845	5.81629	5.7036	Tumor	OV
TCGA-13-0908-01B	1843	1	1.87479	3.96739	2.39218	7.19421	6.17914	Tumor	OV
TCGA-61-2097-01A	1844	0	0.476003	2.70367	4.74965	5.99764	6.64521	Tumor	OV
TCGA-09-1667-01C	1882	0	2.29972	2.95889	3.56891	6.68583	6.11841	Tumor	OV
TCGA-25-1633-01A	1891	1	2.61358	3.07354	3.1614	6.59709	6.69638	Tumor	OV
TCGA-29-2427-01A	1900	0	1.53242	3.14877	2.63703	6.3115	5.03376	Tumor	OV
TCGA-09-2051-01A	1919	0	1.4986	3.59156	2.81823	6.20768	6.44154	Tumor	OV
TCGA-04-1347-01A	1919	0	0.182528	1.31605	1.29587	5.17975	4.99203	Tumor	OV
TCGA-24-1104-01A	1933	1	0.682509	1.67549	4.388	6.88302	6.43081	Tumor	OV
TCGA-04-1350-01A	1946	1	0.106623	1.29241	2.83734	5.57354	5.16685	Tumor	OV
TCGA-24-2036-01A	1947	1	0.047168	1.04444	5.45932	6.32373	6.1964	Tumor	OV
TCGA-24-1546-01A	1955	1	0.30791	2.59377	3.91616	7.00021	7.26952	Tumor	OV
TCGA-25-1319-01A	1977	1	0.8966	2.20646	3.34021	6.14182	5.30743	Tumor	OV
TCGA-29-2425-01A	1977	0	0.907868	1.74295	2.18668	5.74485	7.03325	Tumor	OV
TCGA-13-1507-01A	1993	1	2.32352	4.23736	3.58576	6.2416	5.1046	Tumor	OV
TCGA-61-2098-01A	1993	0	0.0897261	2.08557	4.5555	6.32294	6.52796	Tumor	OV
TCGA-13-1505-01A	1998	0	0.838635	1.73668	2.96523	5.89216	6.26813	Tumor	OV
TCGA-25-1328-01A	2009	1	0.626185	2.23555	3.93598	6.52104	5.93548	Tumor	OV
TCGA-13-1498-01A	2012	1	1.12545	2.38977	2.8268	6.66686	6.58618	Tumor	OV
TCGA-13-0887-01A	2028	1	0.492574	5.09239	2.47695	5.44786	5.20168	Tumor	OV
TCGA-29-1763-01A	2032	0	0.632587	3.32255	3.74231	6.23501	6.392	Tumor	OV
TCGA-24-2289-01A	2049	1	1.45941	2.81398	4.79303	6.30556	7.88924	Tumor	OV
TCGA-23-1114-01B	2089	1	0.0809241	2.72385	4.76757	5.88849	6.42047	Tumor	OV
TCGA-13-0883-01A	2097	1	1.13524	2.18951	4.37876	6.42732	6.20589	Tumor	OV
TCGA-13-0797-01A	2121	0	0.810552	3.16727	4.85972	5.7855	6.02691	Tumor	OV
TCGA-24-2280-01A	2143	0	0.744504	2.27475	5.72538	6.2466	6.96241	Tumor	OV
TCGA-13-A5FT-01A	2143	0	0.63504	2.61888	2.39397	5.46551	6.63191	Tumor	OV
TCGA-13-1488-01A	2154	1	1.11525	2.67749	5.02289	6.27973	4.86873	Tumor	OV
TCGA-13-0897-01A	2182	1	1.0702	4.14456	2.26708	6.63546	6.26496	Tumor	OV
TCGA-61-2104-01A	2338	0	1.39422	3.18634	2.78883	7.03433	6.11271	Tumor	OV
TCGA-13-1403-01A	2345	1	0.0465325	3.03678	4.58094	6.51581	5.39625	Tumor	OV
TCGA-13-2060-01A	2369	0	1.72833	3.16674	2.82046	6.65378	6.22388	Tumor	OV
TCGA-29-1688-01A	2400	1	0.945176	3.33239	2.73783	6.14044	4.9001	Tumor	OV
TCGA-13-1509-01A	2438	0	0.804033	1.78214	2.07551	5.93333	4.93626	Tumor	OV
TCGA-13-1410-01A	2464	0	1.3855	4.01084	3.29012	6.64909	6.21812	Tumor	OV
TCGA-24-1930-01A	2467	1	1.66015	3.41841	2.54546	6.34541	5.95464	Tumor	OV
TCGA-13-1404-01A	2469	0	0.497889	1.22622	1.9349	6.08016	5.15287	Tumor	OV
TCGA-10-0927-01A	2490	1	0.0475526	1.05059	3.79614	5.91925	7.27345	Tumor	OV
TCGA-13-1407-01A	2534	0	0.015529	1.72649	1.46702	5.64866	5.18594	Tumor	OV
TCGA-13-0923-01A	2547	0	0.625534	5.13103	4.63483	5.49655	6.35895	Tumor	OV
TCGA-13-1489-01A	2553	1	0.0563641	2.91835	1.09236	6.73118	5.82513	Tumor	OV
TCGA-13-1489-02A	2553	1	0.738863	4.24673	3.55569	6.93951	6.04696	Tumor	OV
TCGA-04-1542-01A	2561	1	0.0333656	0.826389	1.68664	6.36007	6.32586	Tumor	OV
TCGA-13-0924-01A	2614	0	1.74468	3.0447	3.65729	6.38327	6.48984	Tumor	OV
TCGA-23-1118-01A	2616	0	0.579053	2.89049	2.27874	6.3079	6.55235	Tumor	OV
TCGA-29-2414-01A	2621	1	0.143566	1.51439	3.62396	4.93512	6.12534	Tumor	OV
TCGA-29-2414-02A	2621	1	2.13192	2.58981	1.93833	4.47769	5.63785	Tumor	OV
TCGA-29-1762-01A	2634	1	0.015546	1.36743	3.1552	6.32405	5.88098	Tumor	OV
TCGA-23-2078-01A	2661	0	1.80683	3.43556	4.29355	6.45547	5.80578	Tumor	OV
TCGA-13-0800-01A	2661	0	0	2.91835	2.52718	5.63791	5.7157	Tumor	OV
TCGA-24-1604-01A	2688	1	1.2239	3.08219	3.647	7.08688	6.63642	Tumor	OV
TCGA-09-1662-01A	2717	1	0.716356	1.01557	2.92391	6.04068	6.32303	Tumor	OV
TCGA-24-1603-01A	2742	1	0.406697	1.75899	5.07015	6.5732	6.22944	Tumor	OV
TCGA-13-1495-01A	2749	1	0.0622312	3.31878	3.30652	5.91527	6.44315	Tumor	OV
TCGA-13-0888-01A	2811	1	0	1.39455	2.81576	5.90251	5.59036	Tumor	OV
TCGA-29-1693-01A	3096	0	0.861477	2.99487	2.45668	6.14655	6.04896	Tumor	OV
TCGA-13-0891-01A	3128	1	0.338696	2.3272	6.07019	5.72442	5.74835	Tumor	OV
TCGA-24-1467-01A	3224	1	0.608792	2.7505	2.35877	6.07854	6.38381	Tumor	OV
TCGA-13-0884-01B	3260	1	1.13452	2.83992	1.21025	5.66122	5.51986	Tumor	OV
TCGA-13-0913-02A	3325	0	2.00024	3.58578	2.85864	5.6981	4.44604	Tumor	OV
TCGA-24-2027-01A	3337	1	0.118076	4.12585	4.84036	6.7921	6.14629	Tumor	OV
TCGA-13-0885-01A	3388	0	1.79488	2.19228	1.57498	6.03438	4.93396	Tumor	OV
TCGA-13-0762-01A	3400	0	0.198063	2.50703	1.97944	5.82655	6.65154	Tumor	OV
TCGA-13-1499-01A	3500	0	2.01601	4.05735	3.9538	6.1745	6.54001	Tumor	OV
TCGA-23-2077-01A	3525	0	0.803804	2.25147	4.58769	6.20904	6.87693	Tumor	OV
TCGA-59-2351-01A	3532	0	1.16729	2.94147	2.21616	6.09925	6.39622	Tumor	OV
TCGA-13-0906-01A	3619	0	0.862287	3.71024	2.84821	6.55024	6.46713	Tumor	OV
TCGA-04-1530-01A	3622	1	1.20991	2.71102	3.19298	6.25184	5.72922	Tumor	OV
TCGA-13-0905-01B	3746	0	0.434361	3.71318	4.86353	6.30806	5.39737	Tumor	OV
TCGA-13-1492-01A	3819	1	0.267279	2.67826	1.928	6.17765	6.29128	Tumor	OV
TCGA-61-2111-01A	3825	0	0.899828	2.88288	2.40761	5.97962	6.44076	Tumor	OV
TCGA-13-1497-01A	3871	0	0.842154	3.1426	2.36161	6.05567	5.58807	Tumor	OV
TCGA-23-1119-01A	3953	0	0.469218	3.09869	2.36475	6.29209	5.78769	Tumor	OV
TCGA-13-0900-01B	4077	0	0.971972	2.96633	2.52943	6.36278	6.01082	Tumor	OV
TCGA-24-2020-01A	4624	1	0.147545	4.23777	3.82166	6.69595	5.60033	Tumor	OV
TCGA-13-0886-01A	4665	0	1.11171	3.17884	2.915	5.66856	6.55176	Tumor	OV
TCGA-59-2348-01A	5481	0	1.09809	2.30861	4.58033	6.30306	5.77504	Tumor	OV
TCGA-AJ-A3NH-01A	1	1	0.170075	2.58411	3.53605	5.44549	6.74736	Tumor	UCEC
TCGA-SL-A6J9-01A	2	0	2.05157	5.26079	3.59301	5.46391	5.53162	Tumor	UCEC
TCGA-AJ-A8CW-01A	4	0	1.53278	3.83957	4.45396	6.59795	5.95735	Tumor	UCEC
TCGA-AX-A3FZ-01A	6	0	0.103176	0.577909	4.19392	7.06912	6.73839	Tumor	UCEC
TCGA-AX-A3FT-01A	6	0	2.05365	3.22435	7.0368	6.84307	6.51806	Tumor	UCEC
TCGA-SL-A6JA-01A	7	0	0.328417	3.40982	6.48408	6.43655	6.93956	Tumor	UCEC
TCGA-AX-A3FS-01A	7	0	1.02998	2.0133	4.62629	7.45322	6.37067	Tumor	UCEC
TCGA-AX-A3G6-01A	8	0	0.149146	3.70278	4.52504	5.71249	6.84293	Tumor	UCEC
TCGA-AX-A3G4-01A	9	0	0.340002	2.47641	3.49807	6.42638	6.18786	Tumor	UCEC
TCGA-AX-A3G7-01A	9	0	0.0622158	3.79392	2.74543	5.77357	5.78724	Tumor	UCEC
TCGA-AX-A3GI-01A	12	0	0.42317	2.83239	3.74755	6.68853	6.11757	Tumor	UCEC
TCGA-4E-A92E-01A	13	0	1.79339	3.95616	5.58653	6.06517	6.3016	Tumor	UCEC
TCGA-AX-A3FW-01A	17	0	0.430739	2.27132	1.14079	5.67462	5.71195	Tumor	UCEC
TCGA-D1-A0ZR-01A	17	0	0.406114	3.08314	3.25491	5.29083	6.16026	Tumor	UCEC
TCGA-AW-A1PO-01A	17	0	0.231959	4.08161	5.84571	5.83135	6.17442	Tumor	UCEC
TCGA-D1-A165-01A	20	0	0.256523	2.86965	5.52032	5.65337	6.81438	Tumor	UCEC
TCGA-D1-A16R-01A	21	0	0.563947	4.50935	4.91171	5.15635	6.55905	Tumor	UCEC
TCGA-D1-A1NW-01A	22	0	0.832501	3.10531	3.09379	6.24483	6.17285	Tumor	UCEC
TCGA-D1-A17C-01A	30	0	0.403898	3.38464	3.8636	4.5285	5.71995	Tumor	UCEC
TCGA-D1-A1O7-01A	32	0	0.410828	4.39135	5.30333	5.13798	6.33478	Tumor	UCEC
TCGA-AX-A3G8-01A	36	0	0.0952956	4.70564	7.90629	5.47523	5.92033	Tumor	UCEC
TCGA-D1-A17F-01A	39	0	0.730156	3.4168	3.34015	4.73909	6.02423	Tumor	UCEC
TCGA-AX-A3G3-01A	42	0	2.662	5.40744	4.71624	6.66179	6.76603	Tumor	UCEC
TCGA-D1-A1NS-01A	43	0	0.392123	3.93062	5.74271	5.32592	6.1018	Tumor	UCEC
TCGA-D1-A17N-01A	46	0	0.694917	4.13425	3.25179	3.98023	6.06233	Tumor	UCEC
TCGA-D1-A17A-01A	48	0	0.167147	5.25766	5.23802	5.68716	6.19457	Tumor	UCEC
TCGA-AJ-A3EJ-01A	50	1	0.961367	4.29063	6.40282	6.5982	5.54084	Tumor	UCEC
TCGA-H5-A2HR-01A	53	0	0.346568	3.59347	2.76283	5.48707	5.09808	Tumor	UCEC
TCGA-D1-A101-01A	53	0	1.79405	3.98936	3.05836	5.58223	5.93592	Tumor	UCEC
TCGA-D1-A17Q-01A	54	0	0.466666	4.56611	4.48659	5.15204	6.48105	Tumor	UCEC
TCGA-BG-A221-01A	55	0	1.90438	4.67217	6.46487	6.30592	6.6784	Tumor	UCEC
TCGA-D1-A15Z-01A	58	1	0.623023	3.90954	3.92756	6.10258	6.72363	Tumor	UCEC
TCGA-D1-A1O0-01A	63	0	0.595048	3.58879	2.68717	4.9282	6.25281	Tumor	UCEC
TCGA-DF-A2KN-01A	67	0	2.1867	3.56222	5.02573	7.00896	6.88062	Tumor	UCEC
TCGA-D1-A17T-01A	71	0	0.878582	3.9666	5.1995	5.11687	6.66705	Tumor	UCEC
TCGA-E6-A2P8-01A	72	1	1.44524	3.08044	5.89814	6.62515	4.27055	Tumor	UCEC
TCGA-D1-A16F-01A	80	0	0.291414	3.32045	4.34833	5.9036	6.39168	Tumor	UCEC
TCGA-AJ-A8CT-01A	82	0	2.029	4.79528	2.05788	5.69865	5.17414	Tumor	UCEC
TCGA-AX-A2HK-01A	90	1	0.238557	3.09936	7.44512	5.52463	5.51309	Tumor	UCEC
TCGA-D1-A16X-01A	111	0	1.52825	4.82984	5.09209	3.86256	6.00149	Tumor	UCEC
TCGA-D1-A160-01A	112	0	1.62523	2.39926	4.8605	5.64251	6.66805	Tumor	UCEC
TCGA-D1-A16V-01A	120	1	1.49428	3.22444	5.51057	5.92125	6.14224	Tumor	UCEC
TCGA-D1-A1O8-01A	120	1	1.89054	5.48152	3.17972	5.3976	4.83092	Tumor	UCEC
TCGA-BG-A0W1-01A	122	0	0.207517	3.03747	4.02961	5.05004	6.84005	Tumor	UCEC
TCGA-D1-A3DG-01A	130	1	0.164371	3.21243	7.55523	6.47646	6.39884	Tumor	UCEC
TCGA-D1-A102-01A	135	0	1.35382	4.6384	2.28824	5.92136	6.02351	Tumor	UCEC
TCGA-QS-A8F1-01A	135	1	0.0579988	4.15491	3.12722	3.61777	4.50681	Tumor	UCEC
TCGA-AX-A2H2-01A	145	1	1.74051	4.01386	1.3985	6.38941	5.2278	Tumor	UCEC
TCGA-BS-A0TE-01A	146	1	0.815999	4.81152	5.00001	7.25875	7.01977	Tumor	UCEC
TCGA-D1-A0ZS-01A	148	0	0.350273	2.48717	5.12605	6.03469	6.20028	Tumor	UCEC
TCGA-EY-A72D-01A	179	0	0.232227	1.16795	4.81027	6.7715	7.33163	Tumor	UCEC
TCGA-EY-A1G7-01A	189	1	0.149676	4.70566	2.60116	6.27541	5.64822	Tumor	UCEC
TCGA-D1-A175-01A	202	0	1.01013	3.68932	3.88672	5.96417	6.75002	Tumor	UCEC
TCGA-AP-A1DV-01A	204	0	0.689619	4.30217	3.36704	6.07575	6.04692	Tumor	UCEC
TCGA-PG-A917-01A	212	0	2.15285	4.34446	1.9187	6.48233	6.19827	Tumor	UCEC
TCGA-D1-A17B-01A	213	0	1.13177	4.81715	4.03822	4.56502	5.47876	Tumor	UCEC
TCGA-EC-A1QX-01A	224	0	1.4551	3.81868	7.15611	5.87105	6.67382	Tumor	UCEC
TCGA-FI-A2D4-01A	243	1	0.567245	3.05949	3.53288	5.52877	6.75702	Tumor	UCEC
TCGA-PG-A915-01A	249	0	0.430868	2.85825	1.62154	7.01307	6.51005	Tumor	UCEC
TCGA-D1-A2G6-01A	258	1	0.607099	2.17623	7.72694	6.39767	6.24186	Tumor	UCEC
TCGA-FI-A2EX-01A	284	0	0.536837	4.6714	1.85612	6.24149	5.69911	Tumor	UCEC
TCGA-DI-A1NO-01A	285	1	0.180042	2.33872	1.2729	5.6801	5.63204	Tumor	UCEC
TCGA-KP-A3W1-01A	288	0	1.53853	4.13576	3.06608	6.56367	6.59606	Tumor	UCEC
TCGA-BG-A222-01A	291	0	1.17695	3.30868	8.51771	6.2407	6.62497	Tumor	UCEC
TCGA-BK-A6W4-01A	300	0	0.508454	3.18006	4.7216	6.92051	6.05359	Tumor	UCEC
TCGA-BK-A6W3-01A	305	0	1.95252	4.80481	2.34445	6.55932	6.41114	Tumor	UCEC
TCGA-EY-A212-01A	310	1	0.48859	3.38013	2.7294	5.8211	5.89923	Tumor	UCEC
TCGA-D1-A17M-01A	311	0	1.18705	4.2159	4.80905	5.85968	6.84337	Tumor	UCEC
TCGA-AJ-A23O-01A	312	1	1.84263	3.80216	4.04725	5.46804	5.94834	Tumor	UCEC
TCGA-5S-A9Q8-01A	313	0	0	3.61635	4.0649	4.97446	5.76931	Tumor	UCEC
TCGA-D1-A16Q-01A	324	0	0.74367	3.54911	3.54733	4.58767	6.48555	Tumor	UCEC
TCGA-BG-A0MA-01A	326	1	1.01565	3.41353	4.1544	5.70101	6.28607	Tumor	UCEC
TCGA-EO-A1Y5-01A	332	0	1.92713	4.82892	5.15382	5.51513	5.28374	Tumor	UCEC
TCGA-DF-A2KY-01A	332	0	1.31046	5.76578	8.09891	6.62081	2.96133	Tumor	UCEC
TCGA-EY-A1GW-01A	337	1	0.184533	2.64716	3.67889	5.24028	4.8625	Tumor	UCEC
TCGA-D1-A17R-01A	339	1	0.188521	3.71173	5.06095	5.1396	6.2198	Tumor	UCEC
TCGA-A5-A7WJ-01A	341	0	0.302417	3.57431	5.38684	6.47327	6.70592	Tumor	UCEC
TCGA-BG-A3EW-01A	344	0	0.328313	3.29802	9.56489	6.24099	6.12056	Tumor	UCEC
TCGA-EY-A4KR-01A	346	1	1.50404	3.92016	5.3164	7.87945	6.44946	Tumor	UCEC
TCGA-D1-A16I-01A	350	1	0.253953	4.5864	4.48101	3.82057	5.73204	Tumor	UCEC
TCGA-B5-A1MY-01A	361	1	0.699823	4.18969	5.38213	6.51001	6.65089	Tumor	UCEC
TCGA-AX-A06D-01A	373	1	0.233017	3.18619	6.89024	5.90859	7.02186	Tumor	UCEC
TCGA-DI-A2QT-01A	377	1	0.262687	4.356	4.14841	6.5461	6.1479	Tumor	UCEC
TCGA-BG-A0YV-01A	382	0	0.0680021	4.06845	5.16685	5.93239	5.45253	Tumor	UCEC
TCGA-EY-A210-01A	383	0	1.15629	5.20214	0.960341	6.65445	5.89675	Tumor	UCEC
TCGA-AP-A05O-01A	384	0	0.181271	3.29296	3.22074	5.54417	6.57127	Tumor	UCEC
TCGA-AJ-A5DW-01A	390	0	1.73426	2.2678	4.21894	6.54597	5.79037	Tumor	UCEC
TCGA-BK-A56F-01A	401	0	0.797196	3.20804	2.64376	6.12355	6.26968	Tumor	UCEC
TCGA-D1-A1NU-01A	402	0	0.781042	3.98976	2.34113	6.23375	6.44519	Tumor	UCEC
TCGA-KP-A3W0-01A	404	0	0.912081	3.2293	1.10507	7.06906	5.59629	Tumor	UCEC
TCGA-AX-A1C4-01A	404	0	0.130091	4.14248	4.28562	6.53148	6.62308	Tumor	UCEC
TCGA-B5-A0K9-01A	409	1	1.77584	4.01516	6.43227	6.53779	6.29579	Tumor	UCEC
TCGA-AX-A05S-01A	413	1	0.220086	3.10062	7.0155	5.38445	6.323	Tumor	UCEC
TCGA-BG-A186-01A	419	0	0.652632	3.09796	1.09621	5.13453	5.78724	Tumor	UCEC
TCGA-FI-A2D5-01A	421	1	0.707407	2.04474	4.2425	5.85452	5.36162	Tumor	UCEC
TCGA-BG-A18A-01A	426	0	0.224105	4.02444	3.7871	4.26463	5.76797	Tumor	UCEC
TCGA-K6-A3WQ-01A	427	1	0.239344	2.23362	3.97815	5.98371	5.85427	Tumor	UCEC
TCGA-EY-A548-01A	430	0	0.852246	2.23972	1.82264	5.83653	6.14336	Tumor	UCEC
TCGA-BG-A220-01A	434	0	0.528481	2.70254	7.45958	6.53152	6.49028	Tumor	UCEC
TCGA-EY-A214-01A	438	0	1.19084	2.99371	3.0195	6.36824	6.90826	Tumor	UCEC
TCGA-AJ-A23N-01A	439	1	1.00445	2.74261	4.18432	7.71263	6.41388	Tumor	UCEC
TCGA-AX-A3GB-01A	440	0	0.669341	3.20533	2.66353	5.50915	6.11138	Tumor	UCEC
TCGA-AJ-A3EK-01A	446	0	2.25875	4.17193	5.40721	6.75864	6.39288	Tumor	UCEC
TCGA-B5-A1MW-01A	447	0	0.174776	3.73906	6.52735	6.68205	6.43315	Tumor	UCEC
TCGA-EY-A54A-01A	447	0	1.10398	5.33675	3.16587	7.2974	6.05263	Tumor	UCEC
TCGA-BG-A187-01A	448	0	0.280668	3.02022	2.52614	4.12629	6.50605	Tumor	UCEC
TCGA-D1-A179-01A	448	1	0.125538	1.25581	3.22967	6.2046	6.80373	Tumor	UCEC
TCGA-AJ-A3OL-01A	449	1	0.0781175	3.08496	7.9757	6.63879	6.45153	Tumor	UCEC
TCGA-QS-A744-01A	451	0	0.0844574	3.21418	5.87147	6.23399	6.57886	Tumor	UCEC
TCGA-BG-A0YU-01A	451	0	0.597924	4.39283	2.50503	5.08786	5.5513	Tumor	UCEC
TCGA-A5-A3LP-01A	455	0	0.505374	3.21092	5.839	6.56317	5.93421	Tumor	UCEC
TCGA-EY-A1G8-01A	456	1	0	4.35051	7.13433	5.39549	6.22288	Tumor	UCEC
TCGA-D1-A1O5-01A	458	0	0.113754	4.15727	3.36	5.39769	6.97607	Tumor	UCEC
TCGA-AJ-A3OJ-01A	467	0	1.56938	3.22699	3.18938	6.44722	6.63878	Tumor	UCEC
TCGA-BG-A0RY-01A	469	0	0.131463	2.56511	6.33465	5.997	6.31061	Tumor	UCEC
TCGA-BG-A18B-01A	470	0	2.18455	4.07635	5.50497	5.28424	6.47014	Tumor	UCEC
TCGA-BG-A18C-01A	470	0	0.936653	3.28171	4.24424	5.9454	6.49577	Tumor	UCEC
TCGA-AJ-A3NG-01A	475	0	0.350804	1.59977	5.50632	6.69584	5.24292	Tumor	UCEC
TCGA-D1-A167-01A	478	0	0.428722	3.98873	3.03403	5.80175	6.28454	Tumor	UCEC
TCGA-EY-A1GV-01A	481	0	0.0726817	4.25949	8.60781	5.60933	6.62611	Tumor	UCEC
TCGA-D1-A3DA-01A	483	0	0.0685874	3.98717	8.83706	6.27427	6.19851	Tumor	UCEC
TCGA-A5-A0VQ-01A	485	0	1.43107	3.55277	6.68302	5.42124	6.4505	Tumor	UCEC
TCGA-AJ-A3OK-01A	485	0	0.95299	2.67336	3.25138	5.80028	4.88905	Tumor	UCEC
TCGA-EC-A1NJ-01A	488	0	1.81083	4.29514	2.78262	6.35402	5.48295	Tumor	UCEC
TCGA-EY-A1GT-01A	490	0	0	3.63242	8.19403	6.10813	6.22734	Tumor	UCEC
TCGA-DI-A0WH-01A	496	0	0.246222	3.65137	4.26346	5.11236	5.98476	Tumor	UCEC
TCGA-EO-A3KW-01A	497	0	1.09139	4.51363	6.34595	6.51934	6.45083	Tumor	UCEC
TCGA-B5-A121-01A	504	0	0.481077	3.42958	3.77675	5.83631	6.23945	Tumor	UCEC
TCGA-BK-A4ZD-01A	506	0	0.194913	2.10643	3.58762	6.65687	6.07487	Tumor	UCEC
TCGA-B5-A11U-01A	509	0	0.916704	2.95138	3.09909	6.38583	5.97487	Tumor	UCEC
TCGA-EC-A24G-01A	511	0	1.11715	4.61413	3.78824	5.81145	6.08834	Tumor	UCEC
TCGA-A5-AB3J-01A	512	0	1.2017	3.19148	3.68047	6.89605	5.93853	Tumor	UCEC
TCGA-D1-A0ZN-01A	512	0	0.760627	2.57771	3.80732	6.28146	6.26093	Tumor	UCEC
TCGA-AJ-A3TW-01A	513	0	1.17936	3.34555	3.61439	6.14837	6.61316	Tumor	UCEC
TCGA-AJ-A3QS-01A	513	0	2.26131	4.16708	3.49224	6.63117	5.35316	Tumor	UCEC
TCGA-D1-A1NY-01A	513	0	0.628038	3.48403	5.06206	5.79601	6.14493	Tumor	UCEC
TCGA-D1-A3JP-01A	515	0	1.35333	3.10311	1.7649	7.21203	6.28506	Tumor	UCEC
TCGA-EY-A5W2-01A	516	0	1.0618	4.36043	2.65768	5.67345	6.4017	Tumor	UCEC
TCGA-AJ-A3I9-01A	519	1	0.413863	2.12886	3.74334	6.50957	6.57959	Tumor	UCEC
TCGA-PG-A916-01A	522	0	1.24551	4.00624	5.51425	5.80655	6.84946	Tumor	UCEC
TCGA-D1-A3JQ-01A	526	0	0.677466	2.2002	2.37093	6.86614	5.88959	Tumor	UCEC
TCGA-B5-A11Z-01A	528	0	0.744018	3.20533	3.07259	5.93099	6.31864	Tumor	UCEC
TCGA-D1-A16Y-01A	532	0	0.1864	2.32096	6.07751	3.80617	6.35373	Tumor	UCEC
TCGA-A5-A0R7-01A	535	0	1.35177	2.62942	3.41404	5.12542	6.0516	Tumor	UCEC
TCGA-EY-A1GR-01A	536	0	0.536708	3.0428	2.44712	5.49932	5.95775	Tumor	UCEC
TCGA-JU-AAVI-01A	540	1	1.66758	4.095	3.05438	6.73871	6.28353	Tumor	UCEC
TCGA-AX-A2HH-01A	540	0	0	2.72357	5.24361	6.49638	6.0808	Tumor	UCEC
TCGA-A5-A0GA-01A	543	1	0.748782	3.41954	5.48463	5.88716	6.31026	Tumor	UCEC
TCGA-EY-A1GQ-01A	544	0	0.0930437	1.31251	2.48917	5.42852	6.12135	Tumor	UCEC
TCGA-EY-A547-01A	545	0	0.123729	2.03993	5.14186	4.64582	5.96371	Tumor	UCEC
TCGA-D1-A1NZ-01A	548	0	1.35099	3.42205	4.43383	5.43637	6.29851	Tumor	UCEC
TCGA-D1-A177-01A	548	0	0.350351	4.02373	5.24221	5.82	7.21198	Tumor	UCEC
TCGA-AJ-A3BG-01A	550	0	0.118939	4.39754	5.9967	6.44806	6.71588	Tumor	UCEC
TCGA-AJ-A3BF-01A	551	0	0.821193	3.83574	3.80167	6.85977	5.59929	Tumor	UCEC
TCGA-KP-A3W4-01A	554	1	1.48522	4.42276	4.03053	6.9599	5.92589	Tumor	UCEC
TCGA-D1-A1NX-01A	555	0	0.10805	3.3998	2.93173	5.74132	6.09545	Tumor	UCEC
TCGA-SJ-A6ZJ-01A	556	0	0.166053	3.55107	3.42332	5.52418	6.30706	Tumor	UCEC
TCGA-AX-A3G9-01A	558	0	0.173053	4.85773	2.88423	6.87189	6.46192	Tumor	UCEC
TCGA-B5-A11Y-01A	560	0	2.11223	4.57125	3.54734	5.51539	5.66226	Tumor	UCEC
TCGA-A5-A7WK-01A	560	0	0.223404	2.62204	6.9591	6.09746	5.89241	Tumor	UCEC
TCGA-BG-A0LW-01A	566	0	0.11409	4.6509	2.75364	5.88719	6.37663	Tumor	UCEC
TCGA-D1-A16S-01A	568	0	0.0670321	3.13035	2.42189	5.71609	6.19203	Tumor	UCEC
TCGA-EY-A1GP-01A	573	0	1.26926	3.88754	3.77778	7.01199	5.94772	Tumor	UCEC
TCGA-D1-A3DH-01A	573	0	0	3.02567	8.60628	5.97772	6.59596	Tumor	UCEC
TCGA-EY-A215-01A	574	0	2.09552	2.99023	6.63985	6.0097	6.55174	Tumor	UCEC
TCGA-AJ-A3BI-01A	575	0	1.21265	4.09474	5.57541	4.63441	5.12707	Tumor	UCEC
TCGA-EY-A1GO-01A	586	0	0.090251	1.96302	2.24772	6.7021	6.05791	Tumor	UCEC
TCGA-BG-A0M0-01A	588	0	0.121569	4.68267	6.82803	5.4021	6.68516	Tumor	UCEC
TCGA-EY-A1H0-01A	588	0	0.601073	4.53746	4.47145	5.2924	7.26865	Tumor	UCEC
TCGA-EO-A2CH-01A	590	1	0.257077	2.22393	5.09312	5.82838	6.37541	Tumor	UCEC
TCGA-B5-A11W-01A	593	0	0.815962	3.31481	5.23311	5.08148	5.97135	Tumor	UCEC
TCGA-D1-A174-01A	594	0	2.06151	4.79598	3.77198	3.85835	5.65122	Tumor	UCEC
TCGA-B5-A11V-01A	595	0	0.764914	3.75095	4.63162	5.60175	6.85145	Tumor	UCEC
TCGA-B5-A11X-01A	596	0	1.79159	4.14383	3.08681	6.26049	3.61784	Tumor	UCEC
TCGA-A5-A0R8-01A	596	0	0.947215	3.66013	3.66257	5.10795	5.72592	Tumor	UCEC
TCGA-AJ-A2QL-01A	602	0	1.31131	2.08335	2.56907	5.5197	5.9298	Tumor	UCEC
TCGA-D1-A0ZO-01A	602	0	1.77105	4.77994	3.79794	6.06844	5.77781	Tumor	UCEC
TCGA-EY-A549-01A	605	0	1.23904	3.52487	6.4174	6.42435	5.82813	Tumor	UCEC
TCGA-BG-A2AD-01A	609	0	0.232043	4.01101	4.67241	6.98009	6.45338	Tumor	UCEC
TCGA-EY-A2ON-01A	610	1	0.30462	4.13977	5.23926	7.05829	6.11362	Tumor	UCEC
TCGA-BG-A2L7-01A	612	0	2.02803	3.21257	4.01074	5.94258	6.17166	Tumor	UCEC
TCGA-BG-A0LX-01A	614	0	1.62713	3.65973	5.94088	5.50558	5.30745	Tumor	UCEC
TCGA-AJ-A23M-01A	616	1	0.558046	3.77268	2.49607	6.19698	6.43811	Tumor	UCEC
TCGA-BG-A0MU-01A	617	0	0.333354	3.77463	4.54344	5.34883	6.13323	Tumor	UCEC
TCGA-AX-A3G1-01A	624	1	1.80467	4.58577	3.75154	6.44072	6.21945	Tumor	UCEC
TCGA-AJ-A3NE-01A	628	0	1.99111	3.67123	4.13804	7.05908	6.64128	Tumor	UCEC
TCGA-SJ-A6ZI-01A	631	0	2.08166	3.76103	6.23235	6.39986	5.70776	Tumor	UCEC
TCGA-AJ-A3IA-01A	633	0	1.21985	3.37481	4.90642	6.61949	6.55417	Tumor	UCEC
TCGA-AP-A05P-01A	636	0	0.862178	2.55635	3.28019	6.09171	6.44391	Tumor	UCEC
TCGA-BG-A0M2-01A	637	0	1.01669	4.11418	5.21074	5.62769	5.8092	Tumor	UCEC
TCGA-AJ-A2QK-01A	643	0	2.82882	3.43893	3.67012	5.86035	6.1624	Tumor	UCEC
TCGA-BG-A0MT-01A	644	0	0.276625	2.43901	2.77741	6.0364	6.90471	Tumor	UCEC
TCGA-AJ-A3NF-01A	645	0	2.33064	2.7893	3.33223	6.91393	5.78411	Tumor	UCEC
TCGA-PG-A6IB-01A	648	0	2.40034	4.78044	5.55831	6.90695	3.64978	Tumor	UCEC
TCGA-AP-A3K1-01A	666	1	0.107642	4.05169	5.54896	6.4625	6.8292	Tumor	UCEC
TCGA-AP-A052-01A	669	1	0.50614	4.19006	2.33073	5.59692	6.4504	Tumor	UCEC
TCGA-D1-A103-01A	669	0	1.6068	4.84001	3.70678	5.83882	5.96398	Tumor	UCEC
TCGA-EY-A1GS-01A	670	1	0.182038	4.37456	3.7919	8.6806	5.8697	Tumor	UCEC
TCGA-BG-A0M6-01A	671	1	0.075056	2.81221	3.78111	5.9177	7.56059	Tumor	UCEC
TCGA-EO-A3KU-01A	677	0	0.861226	4.5426	6.0787	6.2634	6.5069	Tumor	UCEC
TCGA-AJ-A3EM-01A	677	0	0	3.02309	4.03374	6.66319	6.16611	Tumor	UCEC
TCGA-AJ-A5DV-01A	679	0	0.604787	3.39666	5.35416	5.9295	6.02798	Tumor	UCEC
TCGA-BG-A3PP-01A	681	0	0.255336	1.7505	5.87995	6.36596	6.21593	Tumor	UCEC
TCGA-AJ-A3EL-01A	684	0	2.73783	5.07829	2.64212	6.53516	6.31417	Tumor	UCEC
TCGA-D1-A0ZZ-01A	686	0	0.0625524	3.01782	1.59957	7.20528	5.3587	Tumor	UCEC
TCGA-PG-A914-01A	687	0	0.772995	4.6742	3.45275	6.32673	6.87848	Tumor	UCEC
TCGA-QF-A5YS-01A	689	0	0.873517	4.16074	3.74787	6.02653	6.4315	Tumor	UCEC
TCGA-EY-A1GK-01A	693	0	2.16578	3.58987	4.34448	5.56995	5.53476	Tumor	UCEC
TCGA-EY-A2OM-01A	694	0	0.572937	2.43242	7.38248	6.22165	6.14277	Tumor	UCEC
TCGA-D1-A17U-01A	697	0	0.85738	4.91388	5.3099	5.53515	6.39279	Tumor	UCEC
TCGA-AX-A1CR-01A	701	0	0.136895	1.24529	4.10678	4.24311	5.48302	Tumor	UCEC
TCGA-A5-A0GW-01A	706	0	2.93076	4.2221	5.35469	5.86577	5.60339	Tumor	UCEC
TCGA-PG-A5BC-01A	707	0	0.593805	2.44888	7.03691	7.20488	6.29942	Tumor	UCEC
TCGA-AP-A054-01A	709	1	0.827715	2.16891	4.22514	6.32037	4.95915	Tumor	UCEC
TCGA-EY-A1GH-01A	710	0	0.84661	3.56019	3.42733	6.65256	5.99353	Tumor	UCEC
TCGA-EY-A1GI-01A	710	0	1.62719	3.15814	4.54857	6.27739	5.81705	Tumor	UCEC
TCGA-E6-A1LX-01A	711	0	0.473113	3.73373	4.40343	6.37397	6.44329	Tumor	UCEC
TCGA-BG-A0MI-01A	714	1	0.688811	4.3388	2.61081	4.95703	6.89849	Tumor	UCEC
TCGA-QS-A5YR-01A	719	0	1.03865	5.02025	5.50965	5.28477	5.92061	Tumor	UCEC
TCGA-BG-A2AE-01A	721	0	1.81282	3.89761	8.34323	6.76113	6.66561	Tumor	UCEC
TCGA-KP-A3VZ-01A	722	0	0.250942	2.11907	0.895659	6.1752	5.56742	Tumor	UCEC
TCGA-AP-A05N-01A	726	1	0.530431	3.08788	5.77679	6.17046	6.60978	Tumor	UCEC
TCGA-D1-A0ZV-01A	728	0	0.839233	3.56591	4.50167	5.14094	5.98752	Tumor	UCEC
TCGA-BK-A26L-01A	734	0	0.653576	3.48925	5.48637	7.06197	6.29965	Tumor	UCEC
TCGA-D1-A17S-01A	739	0	0.0976855	2.21303	3.40508	3.68652	5.38056	Tumor	UCEC
TCGA-BS-A0TA-01A	740	1	3.63326	4.66993	5.1583	5.63793	5.78238	Tumor	UCEC
TCGA-EY-A1GE-01A	741	0	0.980509	4.18512	6.03296	5.8087	6.11825	Tumor	UCEC
TCGA-A5-A0R9-01A	749	0	0.452432	3.72987	3.3814	5.48787	6.48088	Tumor	UCEC
TCGA-A5-A2K5-01A	752	0	0.761373	3.53908	6.07989	5.24203	5.13581	Tumor	UCEC
TCGA-QS-A5YQ-01A	759	0	1.69331	3.73531	4.61251	5.41822	6.01286	Tumor	UCEC
TCGA-BK-A13C-01A	760	0	0.0793275	3.15033	6.52386	5.99058	6.57873	Tumor	UCEC
TCGA-AP-A0LV-01A	763	0	0.360464	3.90063	2.69934	5.67426	6.38727	Tumor	UCEC
TCGA-FI-A2D6-01A	767	1	1.66878	2.842	2.974	5.93795	2.85377	Tumor	UCEC
TCGA-AX-A2H7-01A	772	1	0.247957	1.71085	4.37046	5.29918	5.90353	Tumor	UCEC
TCGA-A5-A3LO-01A	776	0	0.88278	5.1881	4.55359	6.96325	6.46028	Tumor	UCEC
TCGA-AX-A1C8-01A	776	0	0	2.60216	2.52876	7.57804	6.15997	Tumor	UCEC
TCGA-DF-A2L0-01A	788	1	0.272997	4.36959	4.60838	3.1878	5.5187	Tumor	UCEC
TCGA-AX-A1CC-01A	788	0	2.91321	3.63657	3.15888	6.7762	5.84533	Tumor	UCEC
TCGA-KP-A3W3-01A	794	0	1.19335	3.75288	3.43669	6.62729	5.41829	Tumor	UCEC
TCGA-D1-A17L-01A	802	0	1.08156	2.74663	2.34302	4.30398	5.75607	Tumor	UCEC
TCGA-AX-A1C9-01A	802	0	1.6408	3.47414	3.15808	5.43535	6.31245	Tumor	UCEC
TCGA-EO-A3B1-01A	820	0	1.40449	3.07921	2.57076	6.32375	6.52902	Tumor	UCEC
TCGA-B5-A0KB-01B	824	0	0.835314	3.29274	5.22608	4.82449	6.66659	Tumor	UCEC
TCGA-B5-A11P-01B	825	0	0.0611808	2.25275	5.84793	5.4895	6.2673	Tumor	UCEC
TCGA-AP-A0LM-01A	825	0	1.75549	3.60231	4.6391	6.47745	5.73922	Tumor	UCEC
TCGA-EY-A1GF-01A	826	0	2.45008	3.3268	2.94201	6.39418	5.63374	Tumor	UCEC
TCGA-DF-A2KZ-01A	826	0	0.909752	4.23104	6.61776	6.07291	6.2445	Tumor	UCEC
TCGA-EO-A3AZ-01A	826	0	1.24349	5.07689	6.10873	5.43408	5.78984	Tumor	UCEC
TCGA-B5-A0K3-01A	830	1	0.268287	5.13953	3.72805	5.77919	6.10633	Tumor	UCEC
TCGA-EY-A3L3-01A	832	0	0.481346	2.78252	2.98068	7.03991	6.45857	Tumor	UCEC
TCGA-AX-A06H-01A	833	0	2.0024	4.55988	3.99429	5.75684	6.31548	Tumor	UCEC
TCGA-D1-A16G-01A	834	1	0.657391	4.12606	2.84773	5.98604	6.53234	Tumor	UCEC
[truncated: 342 more rows]

## Sheet: ANGPTL4.cox (2)
cancer	HR	HR.95L	HR.95H	pvalue
BRCA	1.01103	0.912232	1.12052	0.83441
CESC	1.18891	1.02998	1.37237	0.0181081
OV	1.16401	1.05308	1.28662	0.00295624
UCEC	0.947679	0.836409	1.07375	0.399053
UCS	1.24411	1.00095	1.54635	0.0490106

## Sheet: SBDS.cox (2)
cancer	HR	HR.95L	HR.95H	pvalue
BRCA	1.29389	0.916875	1.82592	0.142613
CESC	2.11894	1.37811	3.25802	0.000623675
OV	1.364	1.02221	1.82006	0.0349229
UCEC	1.46232	1.09806	1.94741	0.00932361
UCS	1.04634	0.601459	1.82028	0.872612

## Sheet: code
library(survival)
setwd("")
rt=read.table("expTime.txt",header=T,sep="\t",check.names=F,row.names=1)
rt$futime=rt$futime/365
allGene=colnames(rt)[3:(ncol(rt)-2)]
allType=levels(factor(rt[,"CancerType"]))
pdf(file="forest.pdf", width = 10,height =4)
geneNum=length(allGene)
n=length(allType)
nRow=n+1
ylim=c(1,nRow)
layout(matrix(1:(geneNum+1),nc=geneNum+1))
forestCol=rainbow(geneNum)
xlim = c(0,1)
par(mar=c(4.5,1,2,2))
plot(1,xlim=xlim,ylim=ylim,type="n",axes=F,xlab="",ylab="")
text(0.5,n:1,allType,adj=0,cex=1.8)
i=0
for(gene in colnames(rt)[3:(ncol(rt)-2)]){
	i=i+1
	outTab=data.frame()
	for(CancerType in levels(factor(rt[,"CancerType"]))){
		rt1=rt[(rt[,"CancerType"]==CancerType),]
		cox=coxph(Surv(futime, fustat) ~ rt1[,gene], data = rt1)
		coxSummary = summary(cox)
		coxCoef=coxSummary$coefficients
	coxP=coxCoef[,"Pr(>|z|)"]
		outTab=rbind(outTab,
		cbind(cancer=CancerType,
		HR=coxSummary$conf.int[,"exp(coef)"],
		HR.95L=coxSummary$conf.int[,"lower .95"],
		HR.95H=coxSummary$conf.int[,"upper .95"],
				pvalue=coxP) )
	}
	outFile=paste0(gene,".cox.txt")
	write.table(outTab,file=outFile,sep="\t",row.names=F,quote=F)
	coxRT <- read.table(outFile,header=T,sep="\t",row.names=1,check.names=F)
	hr <- sprintf("%.3f",coxRT$"HR")
	hr[as.numeric(hr)<0.001]=0.001
	hrLow <- sprintf("%.3f",coxRT$"HR.95L")
	hrLow[as.numeric(hrLow)<0.0001]=0.0001
	hrHigh <- sprintf("%.3f",coxRT$"HR.95H")
	hrHigh[as.numeric(hrHigh)>1000]=1000
	par(mar=c(4.5,1,2,2),mgp=c(2,0.5,0))
	LOGindex = 10
	hrLow = log(as.numeric(hrLow),LOGindex)
	hrHigh = log(as.numeric(hrHigh),LOGindex)
	hr = log(as.numeric(hr),LOGindex)
	xlim = c(floor(min(hrLow,hrHigh)),ceiling(max(hrLow,hrHigh)))
	plot(1,xlim=xlim,ylim=ylim,type="n",axes=F,ylab="",xaxs="i",xlab="")
	arrows(as.numeric(hrLow),n:1,as.numeric(hrHigh),n:1,angle=90,code=3,length=0.01,col=forestCol[i],lwd=3)
	segments(log(1,LOGindex), 0, x1 = log(1,LOGindex), y1 = n)
	points(as.numeric(hr), n:1, pch = 15, col = forestCol[i], cex=2)
	a1 = axis(1,labels=F,tick=F)
	axis(1,a1,10^a1)
	text(log(1,LOGindex),n+1,gene,cex=2,xpd=T)
	if(i==round(geneNum/2,0)){
		text(log(1,LOGindex),-1.6,"Hazard Ratio",cex=2.5,xpd=T)
	}
}
dev.off()
